# Supplementary material for: Multi-site esterification: a tunable, reversible strategy to tailor therapeutic peptides for delivery
Source: Royal Society of Chemistry journal article supplement (doi:10.1039/d4me00072b), 2024-01-01
Supplement: d4me00072b1.pdf [file d4me00072b1.pdf]

## Supporting Information

### **Multi-site esterification: A tunable, reversible strategy to tailor therapeutic peptides for delivery**

*Mark S. Bannon<sup>1</sup>, Jeffrey F. Ellena<sup>2</sup>, Aditi S. Gourishankar<sup>1</sup>, Spencer R. Marsh<sup>3</sup>, Dilza T. Silva,<sup>4</sup> Nicholas E. Sherman,<sup>4</sup> L. Jane Jourdan<sup>3</sup>, Robert G. Gourdie<sup>3</sup>, and Rachel A. Letteri<sup>\*1</sup>*

<sup>1</sup>Department of Chemical Engineering, University of Virginia, Charlottesville, VA, 22903, USA

<sup>2</sup>Biomolecular Magnetic Resonance Facility, School of Medicine, University of Virginia, Charlottesville, VA, 22903, USA

<sup>3</sup>Fralin Biomedical Institute at Virginia Tech Carillion School of Medicine, Roanoke, VA, 24016, USA

<sup>4</sup>Biomolecular Analysis Facility, School of Medicine, University of Virginia, Charlottesville, VA, 22903, USA

### **Table of Contents**

#### **Section S1: Fischer Esterification of $\alpha$ CT11**

**Figure S1.** RP-HPLC chromatograms of  $\alpha$ CT11 Fischer esterification replicates

**Table S1.** RP-HPLC mobile phase gradients

**Figure S2.** RP-HPLC chromatogram and MALDI-TOF MS plot of  $\alpha$ CT11

**Table S2.** Installed methyl ester number and position, normalized retention times of the products in each gradient, and percent peak area of  $\alpha$ CT11 and its esterified products

**Table S3.** Calculated molecular mass of  $\alpha$ CT11 with various numbers of esters

**Figure S3.** RP-HPLC chromatogram and MALDI-TOF MS of  $\alpha$ CT11-4OMe

**Figure S4.** RP-HPLC chromatogram and MALDI-TOF MS of  $\alpha$ CT11-3OMe(A)

**Figure S5.** RP-HPLC chromatogram and MALDI-TOF MS of  $\alpha$ CT11-3OMe(B)

**Figure S6.** RP-HPLC chromatogram and MALDI-TOF MS of  $\alpha$ CT11-3OMe(C)

**Figure S7.** RP-HPLC chromatogram and MALDI-TOF MS of  $\alpha$ CT11-3OMe(D)

**Figure S8.** RP-HPLC chromatogram and MALDI-TOF MS of  $\alpha$ CT11-2OMe

#### **Section S2: Establishing $\alpha$ CT11 installed ester position using nuclear magnetic resonance (NMR) spectroscopy**

**Figure S9.** Chemical structure of  $\alpha$ CT11-4OMe

**Figure S10.** <sup>1</sup>H NMR spectrum of  $\alpha$ CT11-4OMe (0.75 – 8.50 ppm)

**Figure S11.** Expanded select regions of the  $\alpha$ CT11-4OMe <sup>1</sup>H NMR spectrum

**Figure S12.** <sup>1</sup>H NMR spectrum of  $\alpha$ CT11 and esterified variants (2.7 – 3.75 ppm)

**Figure S13.** Carbonyl carbon region of the  $\alpha$ CT11-4OMe <sup>13</sup>C NMR spectrum (169.5 – 173.2 ppm)

**Table S4.** Chemical shifts of relevant <sup>1</sup>H and <sup>13</sup>C in  $\alpha$ CT11-4OMe

**Figure S14.** Total correlation spectroscopy (TOCSY) of  $\alpha$ CT11-4OMe: HN & H $\epsilon$  region (7.65 – 8.3 ppm) x H $\alpha$ , H $\beta$ , H $\gamma$ , H $\delta$ , and -OCH $_3$  resonance region (0.75 – 4.7 ppm)

**Figure S15.** TOCSY of  $\alpha$ CT11-4OMe: HN & H $\epsilon$  region (7.65 – 8.30 ppm) x HN & H $\epsilon$  region

**Figure S16.** Nuclear Overhauser spectroscopy (NOESY) of  $\alpha$ CT11-4OMe: HN & H $\epsilon$  region (7.65 – 8.30 ppm) x HN & H $\epsilon$  region

**Figure S17.** Clean in phase correlation spectroscopy (CLIP COSY) of  $\alpha$ CT11-4OMe: HN & H $\epsilon$  region (7.65 – 8.30 ppm) x H $\alpha$  region (4.10 – 4.65 ppm).

**Figure S18.** CLIP COSY of  $\alpha$ CT11-4OMe: D5 & D6 H $\alpha$  resonance region (4.5 – 4.6 ppm) x D5 & D6 H $\beta$  resonance region (2.5 – 2.8 ppm)

**Figure S19.** CLIP COSY of  $\alpha$ CT11-4OMe: E8 H $\alpha$  resonance region (4.31 – 4.34 ppm) x the E8 H $\beta$  region (1.70 – 1.95 ppm)

**Figure S20.** CLIP COSY of  $\alpha$ CT11-4OMe: E8 H $\gamma$  resonance region (2.30 – 2.35 ppm) x E8 H $\beta$  resonance region (1.70 – 1.95 ppm)

**Figure S21.** Heteronuclear multiple bond correlation (HMBC) of  $\alpha$ CT11-4OMe: methyl ester H singlet region (3.55 – 3.62 ppm) x carbonyl C region (169 – 173 ppm)

**Figure S22.** HMBC of  $\alpha$ CT11-4OMe: H $\alpha$  region (4.1 – 4.4 ppm) x carbonyl C region (169 – 173 ppm)

**Figure S23.** selHMBC of  $\alpha$ CT11-4OMe: H $\alpha$  region (4.6 – 4.1 ppm) x carbonyl C region (169 – 172 ppm)

**Figure S24.** selHMBC of  $\alpha$ CT11-4OMe: E8 H $\gamma$  resonance region (2.30 – 2.35 ppm) x E8 C $\delta$  region (172.7 – 173.1 ppm)

**Figure S25.** Expanded select regions of the  $\alpha$ CT11-3OMe(D5,D6,E8)  $^1$ H NMR spectrum

**Figure S26.** Carbonyl carbon region of the  $\alpha$ CT11-3OMe(D5,D6,E8)  $^{13}$ C NMR spectrum (170.4 – 173.5 ppm)

**Figure S27.** selHMBC of  $\alpha$ CT11-3OMe(D5,D6,E8): H $\alpha$  region (4.0 – 4.7 ppm) x carbonyl C region (170.4 – 173.2 ppm)

**Figure S28.** selHMBC of  $\alpha$ CT11-3OMe(D5,D6,E8): D5/D6 H $\beta$  and E8 H $\gamma$  resonance region (2.2 – 2.8 ppm) x carbonyl C region (170.4 – 173.2 ppm)

### **Section S3:** Hydrolysis of installed $\alpha$ CT11 methyl esters

**Figure S29.** Hydrolysis of  $\alpha$ CT11-3OMe(D5,D6,E8) in 1X PBS (pH 7.4)

**Figure S30.** Hydrolysis of  $\alpha$ CT11-4OMe in 1X PBS (pH 7.4)

**Figure S31.** RP-HPLC chromatograms and MALDI-TOF spectra of  $\alpha$ CT11 in 1X PBS (pH 7.4) over 1 week

**Table S5.** Molecular weights of peaks observed in MALDI-TOF MS data measuring the incubation of  $\alpha$ CT11 in 1X PBS, as shown in Figure S31.

**Table S6.** Percent activation of  $\alpha$ CT11-3OMe(D5,D6,E8) and -4OMe in 1X PBS (pH 7.4) and 100 mM carbonate buffer (pH 10.0) over 8 d.

**Figure S32.** PLE-catalyzed hydrolysis of  $\alpha$ CT11

**Figure S33.** MALDI-TOF MS results of PLE-catalyzed hydrolysis of  $\alpha$ CT11

**Table S7.** MALDI-TOF MS results of PLE-catalyzed hydrolysis of  $\alpha$ CT11

**Figure S34.** RP-HPLC chromatogram of PLE-catalyzed hydrolysis of  $\alpha$ CT11-3OMe(D5,D6,E8)

**Figure S35.** MALDI-TOF MS results of PLE-catalyzed hydrolysis of  $\alpha$ CT11-3OMe(D5,D6,E8)

**Table S8.** MALDI-TOF MS results of PLE-catalyzed hydrolysis of  $\alpha$ CT11-3OMe(D5,D6,E8)

**Figure S36.** RP-HPLC chromatogram of PLE-catalyzed hydrolysis of  $\alpha$ CT11-4OMe

**Figure S37.** MALDI-TOF MS results of PLE-catalyzed hydrolysis of  $\alpha$ CT11-4OMe

**Table S9.** MALDI-TOF MS results of PLE-catalyzed hydrolysis of  $\alpha$ CT11-4OMe

**Figure S38.** RP-HPLC chromatograms  $\alpha$ CT11 in 100 mM carbonate buffer (pH 10) over 1 week

**Figure S39.** Hydrolysis of  $\alpha$ CT11-3OMe(D5,D6,E8) in 100 mM carbonate buffer (pH 10.0)

**Figure S40.** Hydrolysis of  $\alpha$ CT11-4OMe in 100 mM carbonate buffer (pH 10.0)

**Figure S41.** LC-MS chromatograms of  $\alpha$ CT11-3OMe(D5,D6,E8) after 3 d of stirring in 100 mM carbonate buffer (pH 10.0) at 37 °C

**Figure S42.** LC-MS chromatograms of  $\alpha$ CT11-3OMe(D5,D6,E8) after 5 d of stirring in 100 mM carbonate buffer (pH 10.0) at 37 °C

**Table S10.** % Abundance and retention times (RT, min) of  $\alpha$ CT11-based formulations produced by the hydrolysis of  $\alpha$ CT11-3OMe(D5,D6,E8) in 100 mM carbonate buffer (pH 10) after 3 d

**Table S11.** % Abundance and retention times (RT, min) of  $\alpha$ CT11-based formulations produced by the hydrolysis of  $\alpha$ CT11-4OMe in 100 mM carbonate buffer (pH 10) after 3 d

**Figure S43.** MALDI-TOF MS of  $\alpha$ CT11-3OMe(D5,D6,E8) after 2 h of incubation into 1X PBS

**Figure S44.** MALDI-TOF MS of  $\alpha$ CT11-4OMe after 2 h of incubation into 1X PBS

**Figure S45.** LC-MS chromatograms of  $\alpha$ CT11-3OMe(D5,D6,E8) after 5 min of incubation in 37 °C 1X PBS (pH 7.4)

**Figure S46.** LC-MS chromatograms of  $\alpha$ CT11-3OMe(D5,D6,E8) after 2 h of incubation in 37 °C 1X PBS (pH 7.4)

**Figure S47.** LC-MS chromatograms of  $\alpha$ CT11-3OMe(D5,D6,E8) after 6 h of incubation in 37 °C 1X PBS (pH 7.4)

**Figure S48.** LC-MS chromatograms of  $\alpha$ CT11-3OMe(D5,D6,E8) after 12 h of incubation in 37 °C 1X PBS (pH 7.4)

**Figure S49.** LC-MS chromatograms of  $\alpha$ CT11-3OMe(D5,D6,E8) after 24 h of incubation in 37 °C 1X PBS (pH 7.4)

**Figure S50.** LC-MS chromatograms of  $\alpha$ CT11-3OMe(D5,D6,E8) after 1 week of incubation in 37 °C 1X PBS (pH 7.4)

**Figure S51.** LC-MS chromatograms of  $\alpha$ CT11-4OMe after 5 min of incubation in 37 °C 1X PBS (pH 7.4)

**Figure S52.** LC-MS chromatograms of  $\alpha$ CT11-4OMe after 2 h of incubation in 37 °C 1X PBS (pH 7.4)

**Figure S53.** LC-MS chromatograms of  $\alpha$ CT11-4OMe after 6 h of incubation in 37 °C 1X PBS (pH 7.4)

**Figure S54.** LC-MS chromatograms of  $\alpha$ CT11-4OMe after 12 h of incubation in 37 °C 1X PBS (pH 7.4)

**Figure S55.** LC-MS chromatograms of  $\alpha$ CT11-4OMe after 24 h of incubation in 37 °C 1X PBS (pH 7.4)

**Figure S56.** LC-MS chromatograms of  $\alpha$ CT11-4OMe after 1 week of incubation in 37 °C 1X PBS (pH 7.4)

**Figure S57.** LC-MS chromatograms of relevant isotopes of  $\alpha$ CT11-3OMe(D5,D6,E8) after 5 min of incubation in 37 °C 1X PBS (pH 7.4)

**Figure S58.** LC-MS chromatograms of relevant isotopes of  $\alpha$ CT11-4OMe after 5 min of incubation in 37 °C 1X PBS (pH 7.4)

**Table S12.** % Abundance and retention times (RT, min) of  $\alpha$ CT11-based formulations produced by the hydrolysis of  $\alpha$ CT11-3OMe(D5,D6,E8) in 37 °C 1X PBS over 7 d

**Table S13.** % Abundance and retention times (RT, min) of  $\alpha$ CT11-based formulations produced by the hydrolysis of  $\alpha$ CT11-3OMe4OMe in 37 °C 1X PBS over 7 d, quantified by LC-MS

**Section S4:** Activity of esterified  $\alpha$ CT11 prodrugs

**Figure S59.** MALDI-TOF MS of  $\alpha$ CT11-3OMe(D5,D6,E8) after the trifluoroacetate counterion exchange

**Figure S60.** MALDI-TOF MS of  $\alpha$ CT11-4OMe after the trifluoroacetate counterion exchange

**Table S14.** Scratch wound assay results

**Table S15.** Statistical analysis of scratch wound assays



## Section S1: Fischer Esterification of $\alpha$ CT11

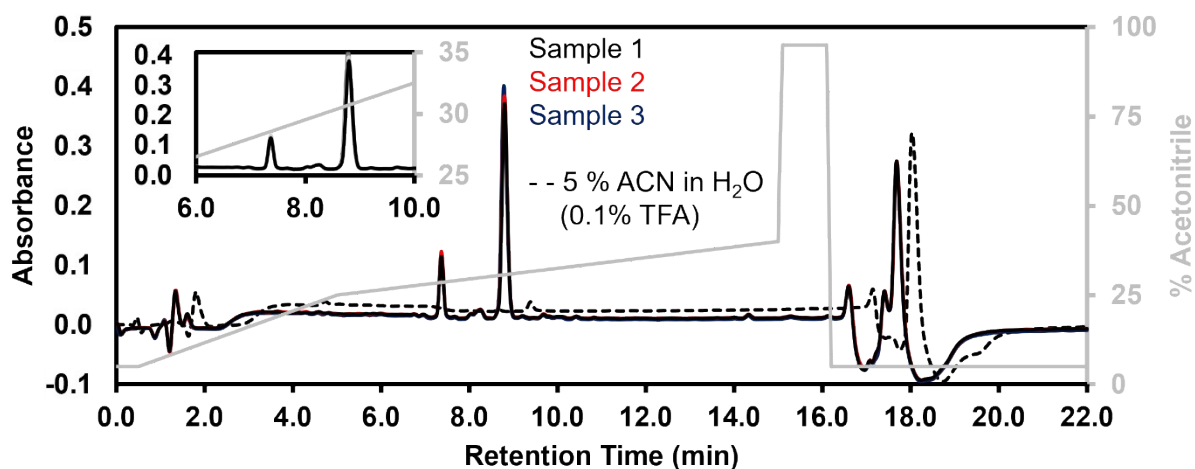

**Figure S1.** RP-HPLC chromatograms of  $\alpha$ CT11 Fischer esterification replicates, showing 3 independently set up reaction mixtures. The peptide eluted between 25% and 40% acetonitrile (ACN) in each different reaction, with the produced peaks overlapping each other. Mobile phase composition (% ACN, gray) is plotted against normalized retention time in each RP-HPLC chromatogram.

**Table S1.** RP-HPLC mobile phase gradient

| Mobile Phase Stages | Time (min) |             | Mobile Phase Composition |                               |
|---------------------|------------|-------------|--------------------------|-------------------------------|
|                     | Analytical | Preparative | % Water + 0.1% TFA (A)   | % Acetonitrile + 0.1% TFA (B) |
| Warm up             | 0          | 0           | 95                       | 5                             |
|                     | 0.5        | 2.6         | 95                       | 5                             |
| Ramp up             | 5          | 25.2        | 77                       | 23                            |
| Elution             | 15         | 50.2        | 74                       | 26                            |
|                     | 15.1       | 50.7        | 5                        | 95                            |
| Purge               | 16.1       | 60.0        | 5                        | 95                            |
|                     | 16.2       | 60.6        | 95                       | 5                             |
| Equilibration       | 22         | 70.0        | 95                       | 5                             |

In this study, our RP-HPLC mobile phase gradients had five stages. First was the warm-up stage, where the system was equilibrated for 30 s with a mobile phase composition of 95% water + 0.1% trifluoroacetic acid (TFA) (mobile phase A) and 5% acetonitrile + 0.1% TFA (mobile phase B). During the ramp-up stage, the % B in the mobile phase was increased linearly to 23% over 4.5 min. In the elution stage, the % B was further increased linearly to 26% over 10 min to elute the sample from the column. To remove any bound solute from the column, we then increased the % B to 95% linearly and held at that composition for 1 min, in the purge phase of the elution. Finally, the equilibration phase

was used to prepare the system for the next injection, where the % B was reset to 5% and held there until the end of the run. The flowrates of mobile phase in the analytical and preparative-scale RP-HPLC systems were 1 mL/min and 25.52 mL/min, respectively.

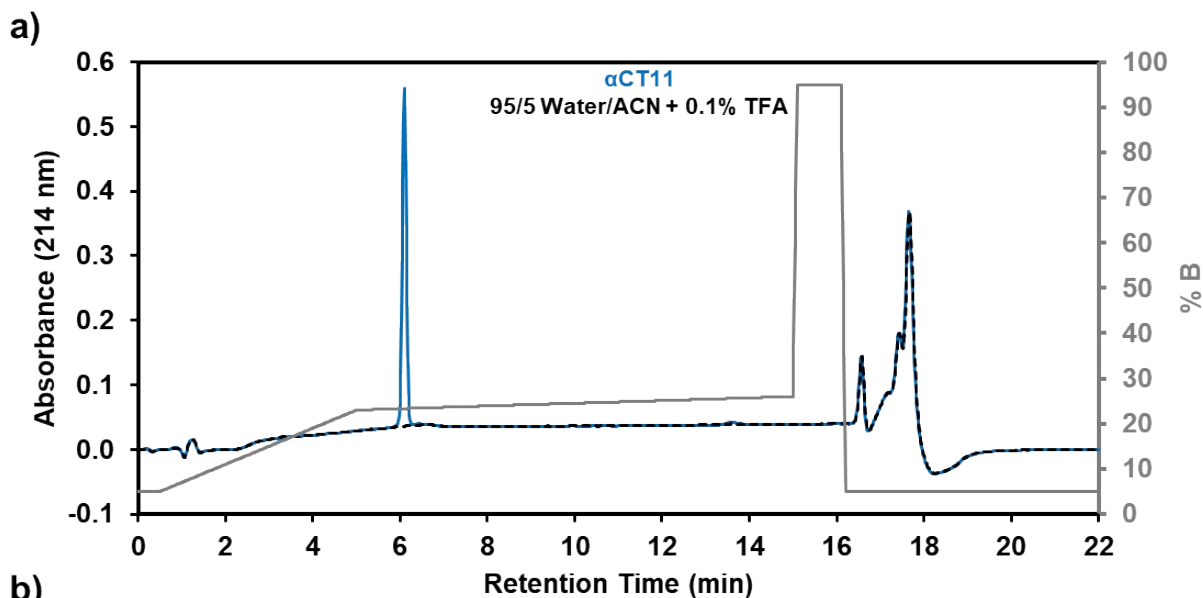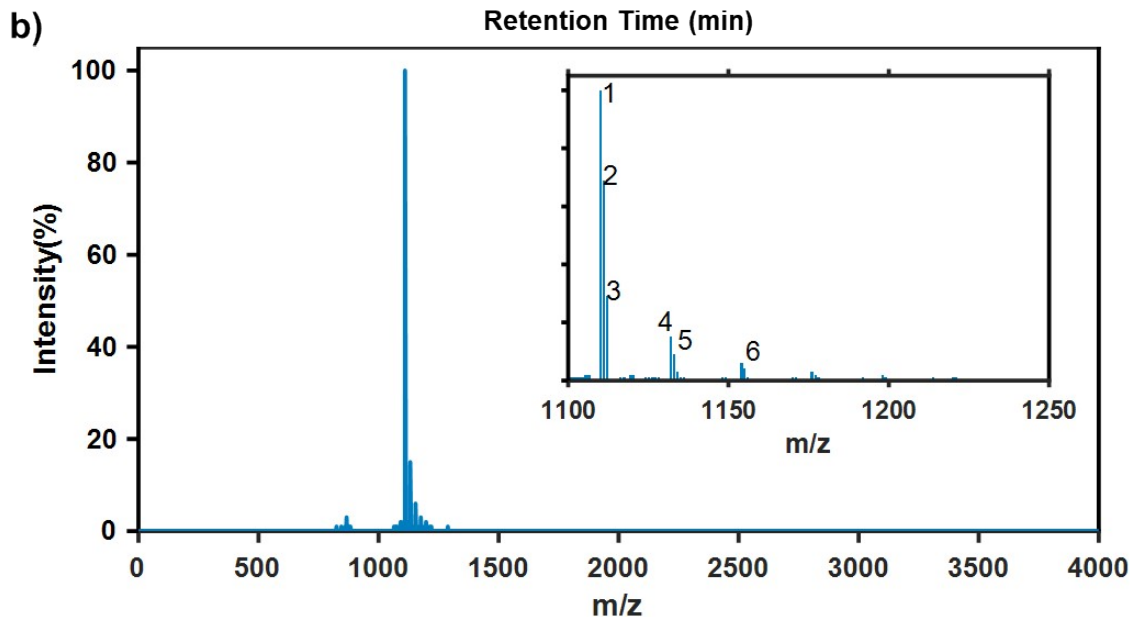

| label | Mass (Da) | Intensity (%) | Species                                 |
|-------|-----------|---------------|-----------------------------------------|
| 1     | 1110      | 100           | [ $\alpha$ CT11 + H] <sup>+</sup>       |
| 2     | 1111.1    | 69            |                                         |
| 3     | 1112.1    | 29            |                                         |
| 4     | 1132.1    | 15            | [ $\alpha$ CT11 + Na] <sup>+</sup>      |
| 5     | 1133.1    | 9             |                                         |
| 6     | 1154.1    | 6             | [ $\alpha$ CT11 + 2Na - H] <sup>+</sup> |

**Figure S2.** a) RP-HPLC chromatogram and b) MALDI-TOF MS of  $\alpha$ CT11. In MALDI-TOF, [ $\alpha$ CT11+2Na-H]<sup>+</sup> indicates that one of the originally protonated carboxylic acids now carries a sodium counterion.

**Table S2.** Installed methyl ester number and position, normalized retention times of the products in each gradient, and percent peak area of  $\alpha$ CT11 and its esterified products

| $\alpha$ CT11 Product | # of methyl esters installed | Esterified Residues | COOH Residues  | Normalized Retention Time ( $\tau$ ) | Percent Peak Area |
|-----------------------|------------------------------|---------------------|----------------|--------------------------------------|-------------------|
| $\alpha$ CT11         | 0                            | N/A                 | D5, D6, E8, I9 | 0                                    | N/A               |
| 2OMe                  | 2                            | *Not Determined     |                | 0.22                                 | 1                 |
| 3OMe(A)               | 3                            | D5, D6, E8          | I9             | 0.35                                 | 19                |
| 3OMe(B)               | 3                            | D5, D6, I9          | E8             | 0.69                                 | 4                 |
| 3OMe(C)               | 3                            | D6, E8, I9          | D5             | 0.70                                 |                   |
| 3OMe(D)               | 3                            | D5, E8, I9          | D6             | 0.74                                 |                   |
| 4OMe                  | 4                            | D5, D6, E8, I9      | N/A            | 1.00                                 | 74                |

\*Ester positions were not able to be determined by  $^1\text{H}$  NMR spectroscopy (insufficient amounts isolated)

**Table S3.** Calculated molecular mass of  $\alpha$ CT11 with various numbers of esters, charge (z) = 1

| Sample:                         | $\alpha$ CT11 | $\alpha$ CT11-1OMe | $\alpha$ CT11-2OMe | $\alpha$ CT11-3OMe | $\alpha$ CT11-4OMe |
|---------------------------------|---------------|--------------------|--------------------|--------------------|--------------------|
| Exact Mass:                     | 1109.6        | 1123.6             | 1137.6             | 1151.6             | 1165.7             |
| [M + H] <sup>+</sup>            | 1110.6        | 1124.6             | 1138.6             | 1152.6             | 1166.7             |
| [M + Na] <sup>+</sup>           | 1132.6        | 1146.6             | 1160.6             | 1174.6             | 1188.7             |
| [M + K] <sup>+</sup>            | 1148.6        | 1162.6             | 1176.6             | 1190.6             | 1204.7             |
| [M + 2Na - H] <sup>+</sup>      | 1154.6        | 1168.6             | 1182.6             | 1196.6             |                    |
| [M + K + Na - H] <sup>+</sup>   | 1170.6        | 1184.6             | 1198.6             | 1212.6             |                    |
| [M + 1 imide + H] <sup>+</sup>  | 1092.6        | 1106.6             | 1120.6             | 1134.6             |                    |
| [M + 1 imide + Na] <sup>+</sup> | 1114.6        | 1128.6             | 1142.6             | 1156.6             |                    |
| [M + 1 imide + K] <sup>+</sup>  | 1130.6        | 1144.6             | 1158.6             | 1172.6             |                    |
| [M + 2 imide + H] <sup>+</sup>  | 1074.6        | 1088.6             | 1102.6             |                    |                    |
| [M + 2 imide + Na] <sup>+</sup> | 1096.6        | 1110.6             | 1124.6             |                    |                    |
| [M + 2 imide + K] <sup>+</sup>  | 1112.6        | 1126.6             | 1140.6             |                    |                    |
| [M + 3 imide + H] <sup>+</sup>  | 1056.6        | 1070.6             |                    |                    |                    |
| [M + 3 imide + Na] <sup>+</sup> | 1078.6        | 1092.6             |                    |                    |                    |
| [M + 3 imide + K] <sup>+</sup>  | 1094.6        | 1108.6             |                    |                    |                    |

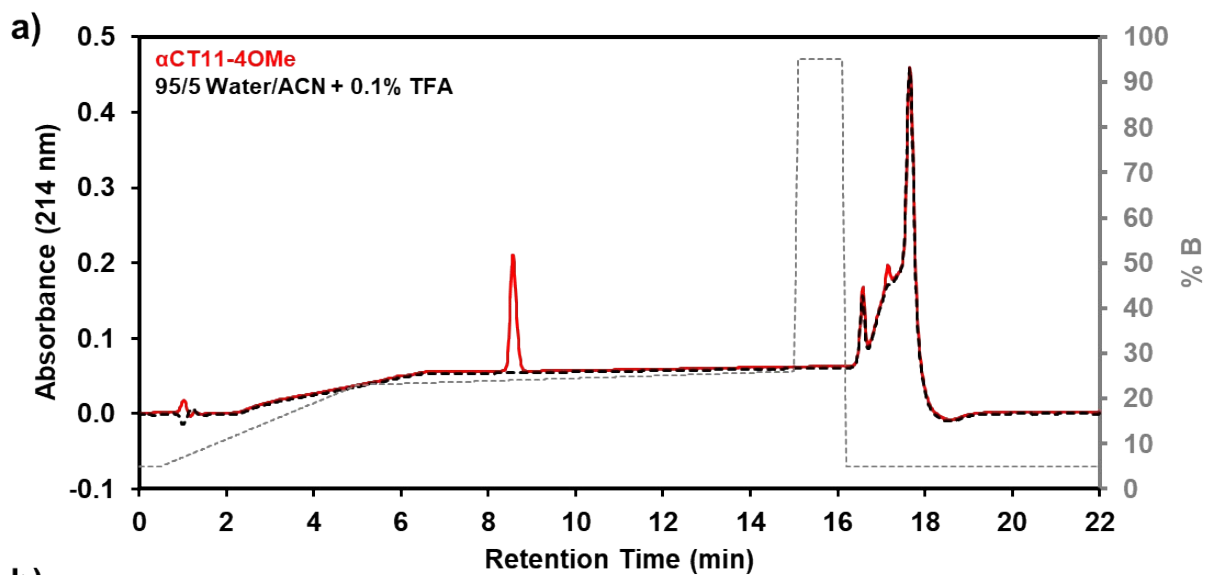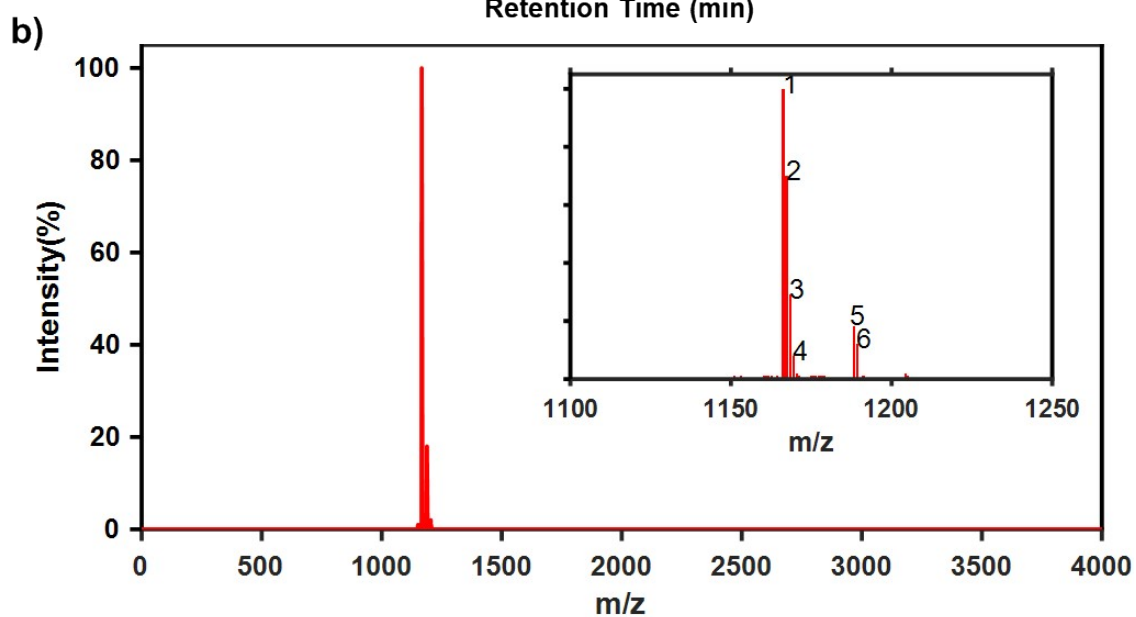

| label | Mass (Da) | Intensity (%) | Species                                 |
|-------|-----------|---------------|-----------------------------------------|
| 1     | 1166.3    | 100           | [ $\alpha$ CT11-4OMe + H] <sup>+</sup>  |
| 2     | 1167.3    | 70            |                                         |
| 3     | 1168.4    | 29            |                                         |
| 4     | 1169.4    | 8             |                                         |
| 5     | 1188.3    | 18            | [ $\alpha$ CT11-4OMe + Na] <sup>+</sup> |
| 6     | 1189.3    | 12            |                                         |

Figure S3. a) RP-HPLC chromatogram and b-c) MALDI-TOF MS of  $\alpha$ CT11-4OMe.

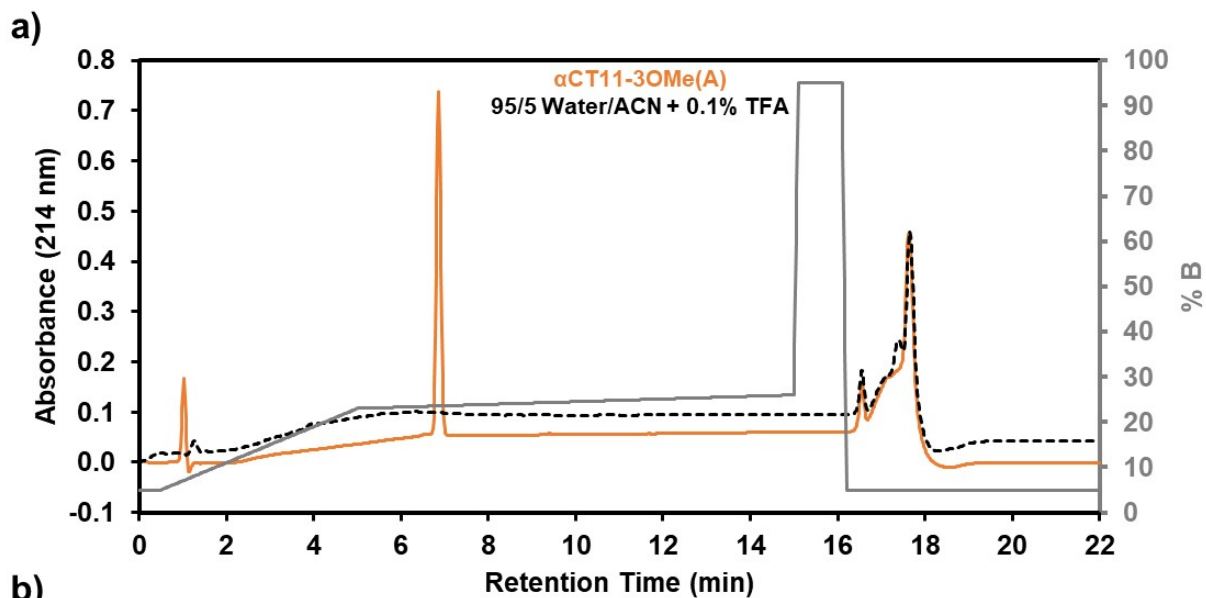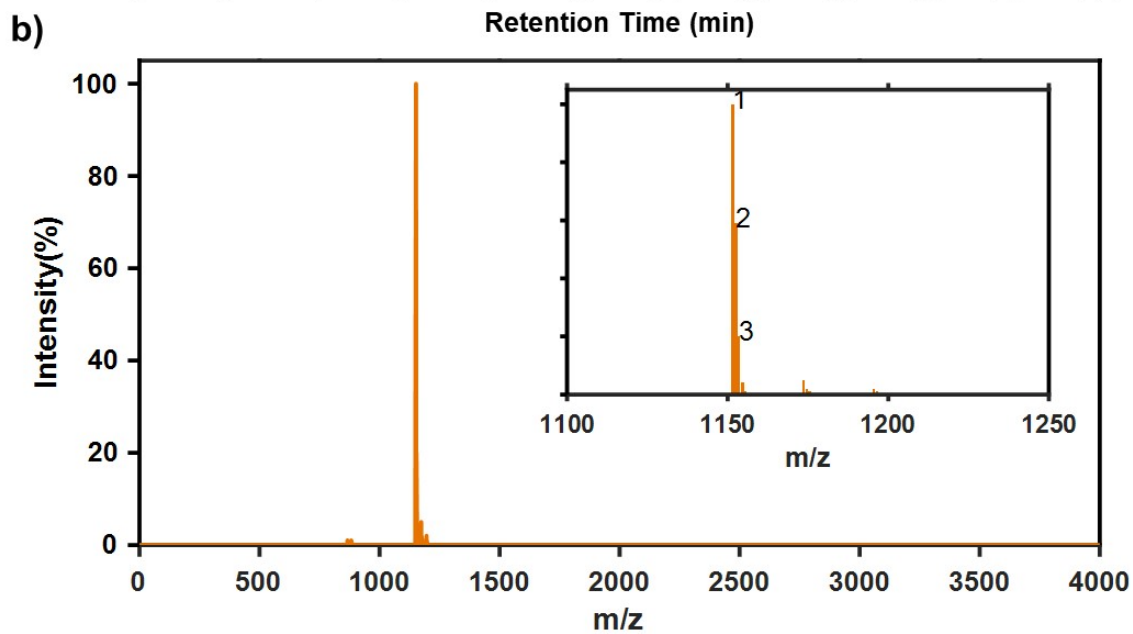

| label | Mass (Da) | Intensity (%) | Species                                 |
|-------|-----------|---------------|-----------------------------------------|
| 1     | 1151.6    | 100           | $[\alpha\text{CT11-3OMe} + \text{H}]^+$ |
| 2     | 1152.6    | 59            | $[\alpha\text{CT11-3OMe} + \text{H}]^+$ |
| 3     | 1153.6    | 20            | $[\alpha\text{CT11-3OMe} + \text{H}]^+$ |

**Figure S4.** a) RP-HPLC chromatogram and b) MALDI-TOF MS of  $\alpha$ CT11-3OMe(A), with  $[3\text{OMe}+2\text{Na-H}]^+$  indicating that one of the originally protonated carboxylic acids now carries a sodium counterion.

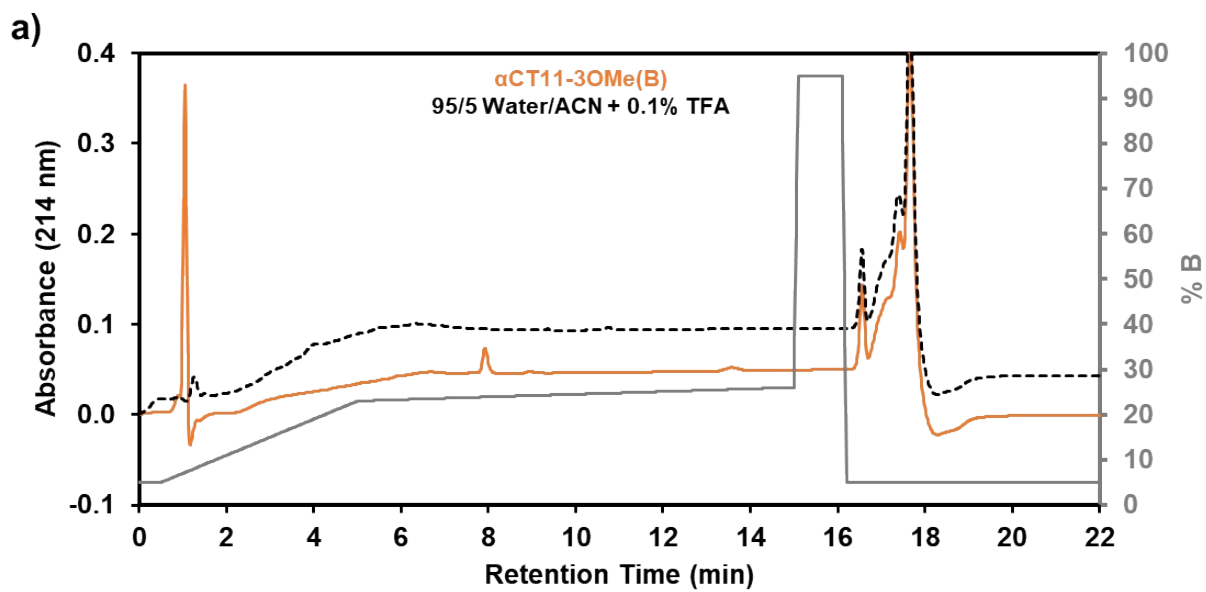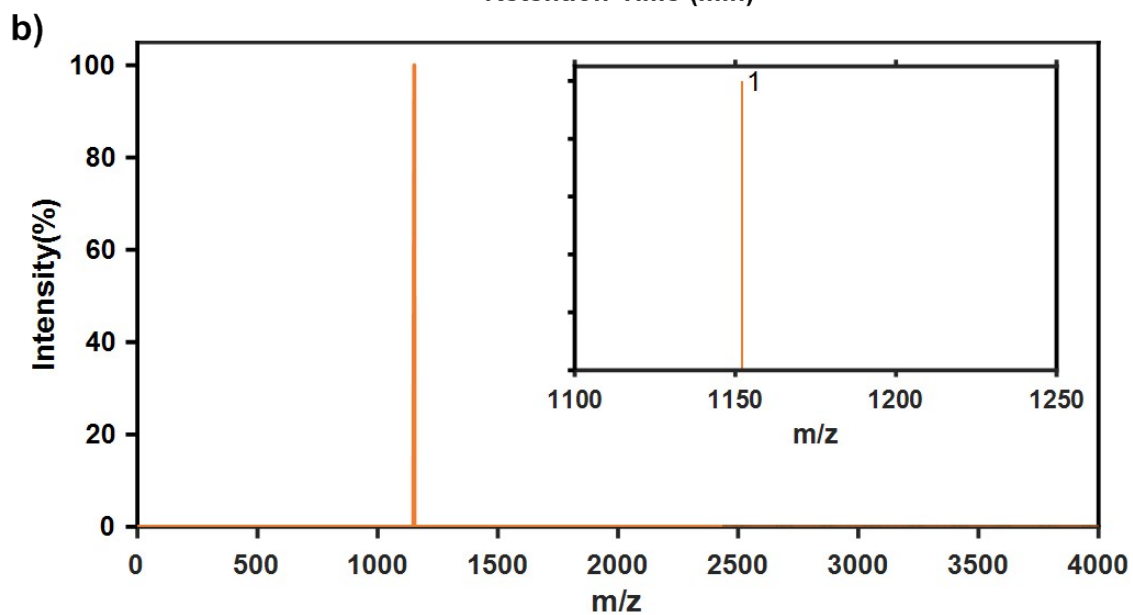

| label | Mass (Da) | Intensity (%) | Species                               |
|-------|-----------|---------------|---------------------------------------|
| 1     | 1152.2    | 100           | $[\alpha$ CT11-3OMe + H] <sup>+</sup> |

Figure S5: a) RP-HPLC chromatogram and b) MALDI-TOF MS of  $\alpha$ CT11-3OMe(B)

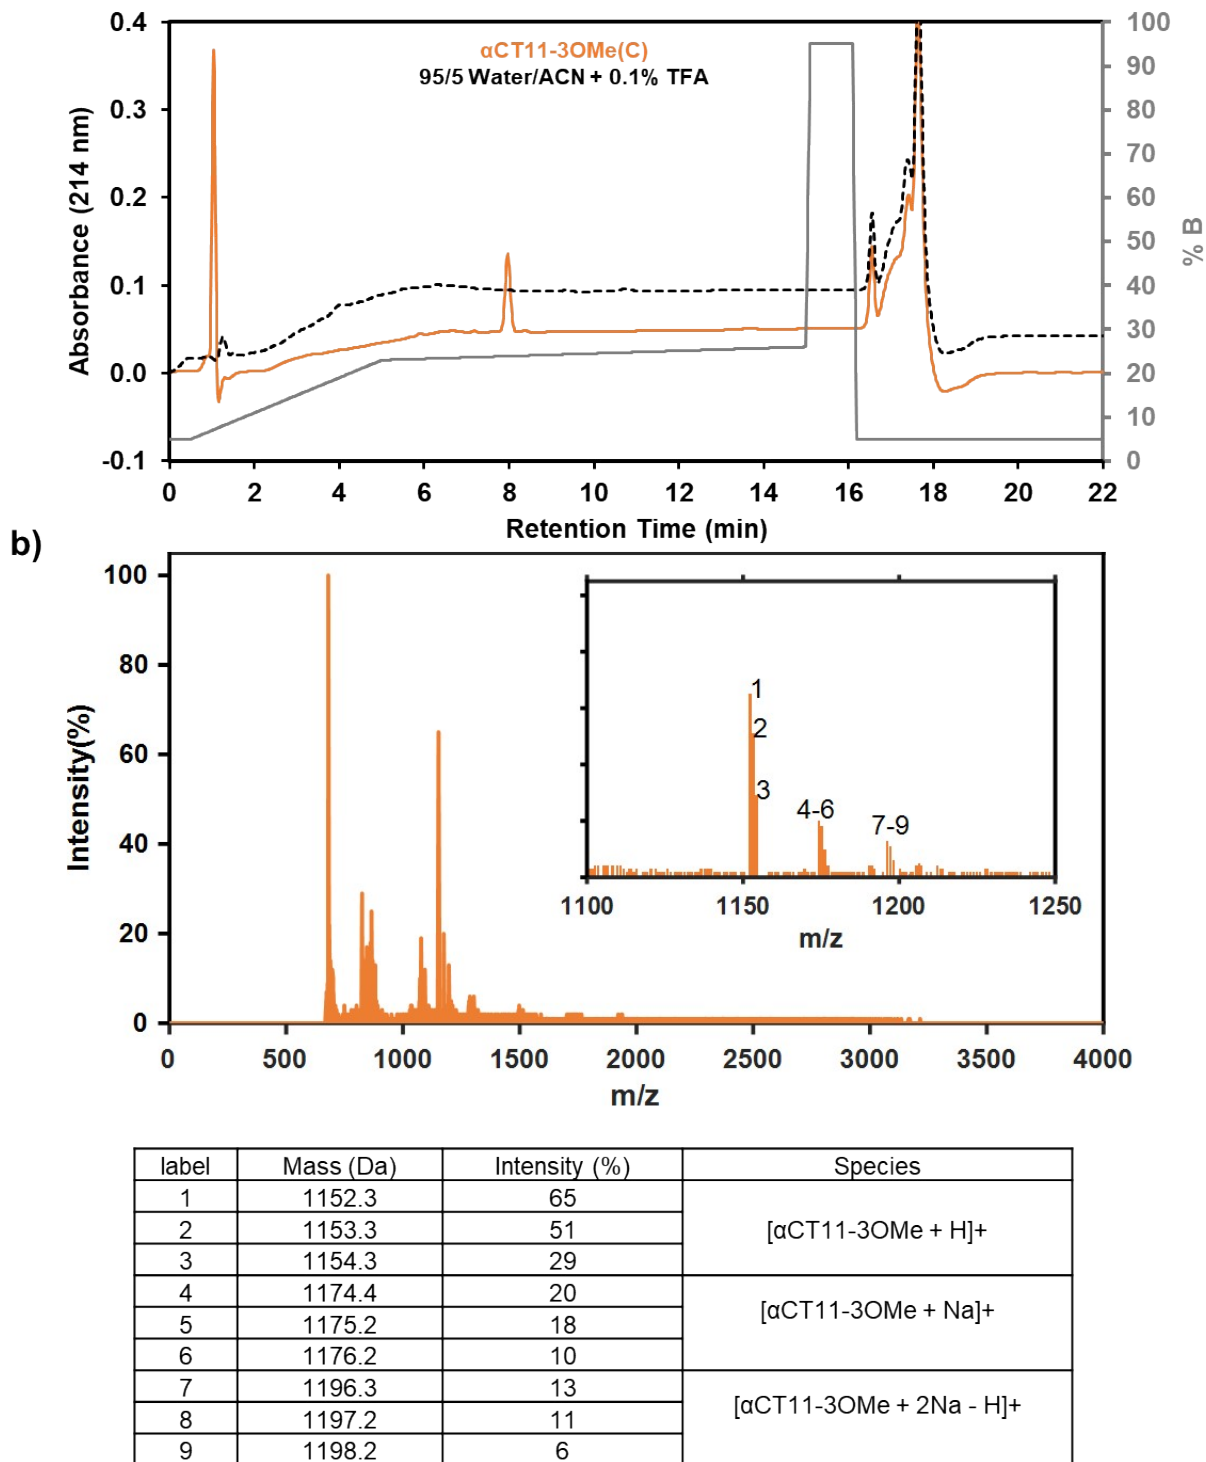

**Figure S6:** a) RP-HPLC chromatogram (gradient 2) and b) MALDI-TOF MS plot of  $\alpha$ CT11-3OMe(C).



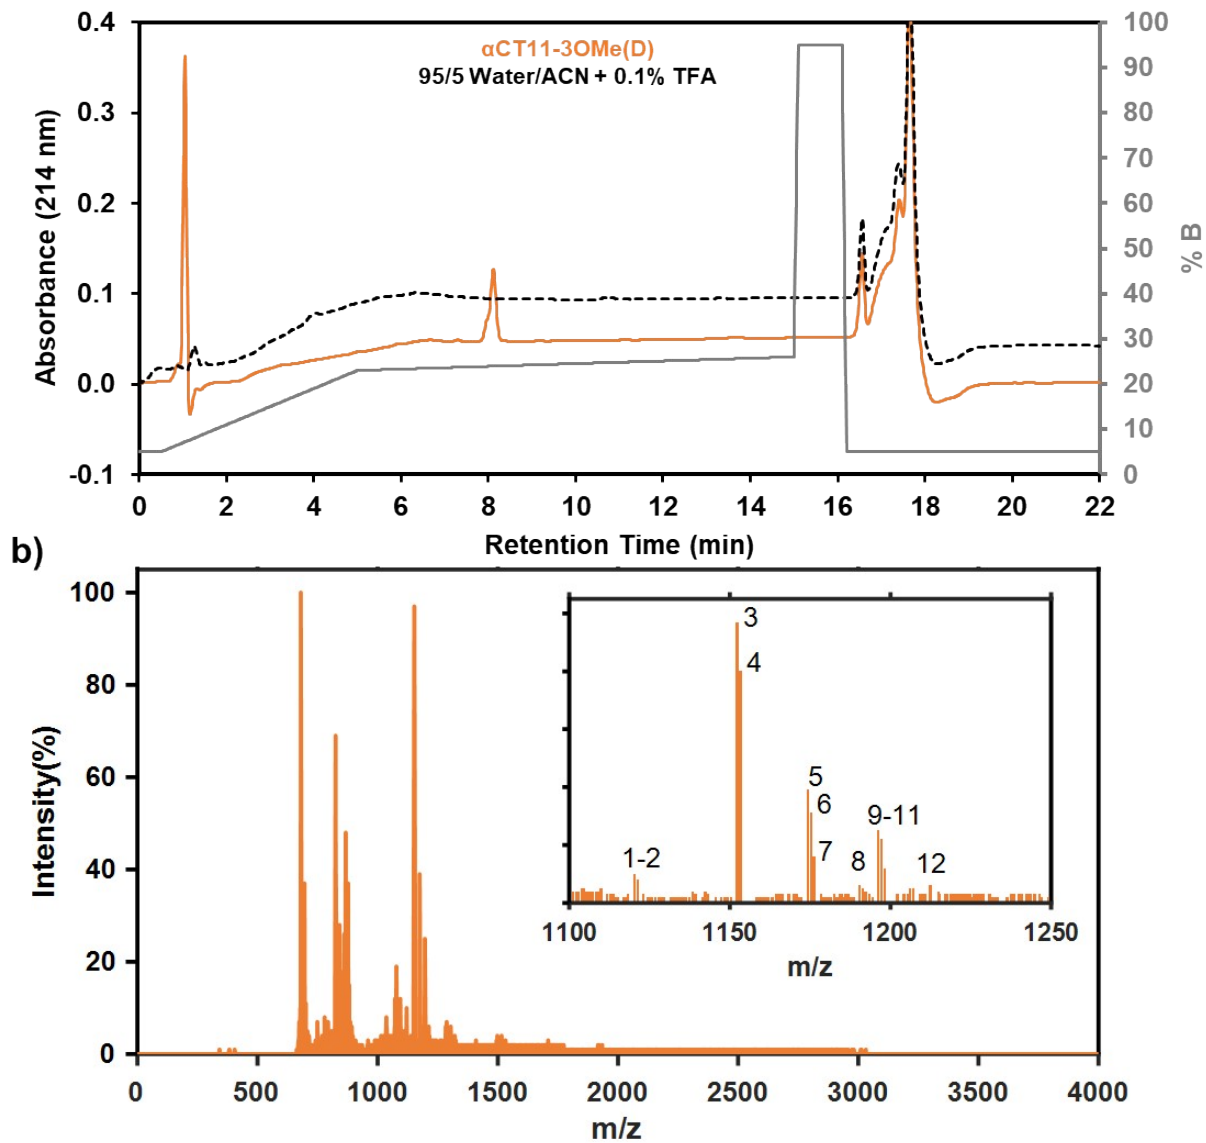

| label | Mass (Da) | Intensity (%) | Species                                          |
|-------|-----------|---------------|--------------------------------------------------|
| 1     | 1120.3    | 10            | [ $\alpha$ CT11-2OMe + 1 imide + H] <sup>+</sup> |
| 2     | 1121.3    | 8             |                                                  |
| 3     | 1152.3    | 97            | [ $\alpha$ CT11-3OMe + H] <sup>+</sup>           |
| 4     | 1153.3    | 80            |                                                  |
| 5     | 1174.4    | 39            | [ $\alpha$ CT11-3OMe + Na] <sup>+</sup>          |
| 6     | 1175.3    | 31            |                                                  |
| 7     | 1176.2    | 16            | [ $\alpha$ CT11-3OMe + K] <sup>+</sup>           |
| 8     | 1190.3    | 6             |                                                  |
| 9     | 1196.3    | 25            | [ $\alpha$ CT11-3OMe + 2Na - H] <sup>+</sup>     |
| 10    | 1197.3    | 22            |                                                  |
| 11    | 1198.2    | 12            |                                                  |
| 12    | 1212.4    | 6             | [ $\alpha$ CT11-3OMe + K + Na - H] <sup>+</sup>  |

**Figure S7. a)** RP-HPLC chromatogram (gradient 2) and **b)** MALDI-TOF MS of  $\alpha$ CT11-3OMe(D).

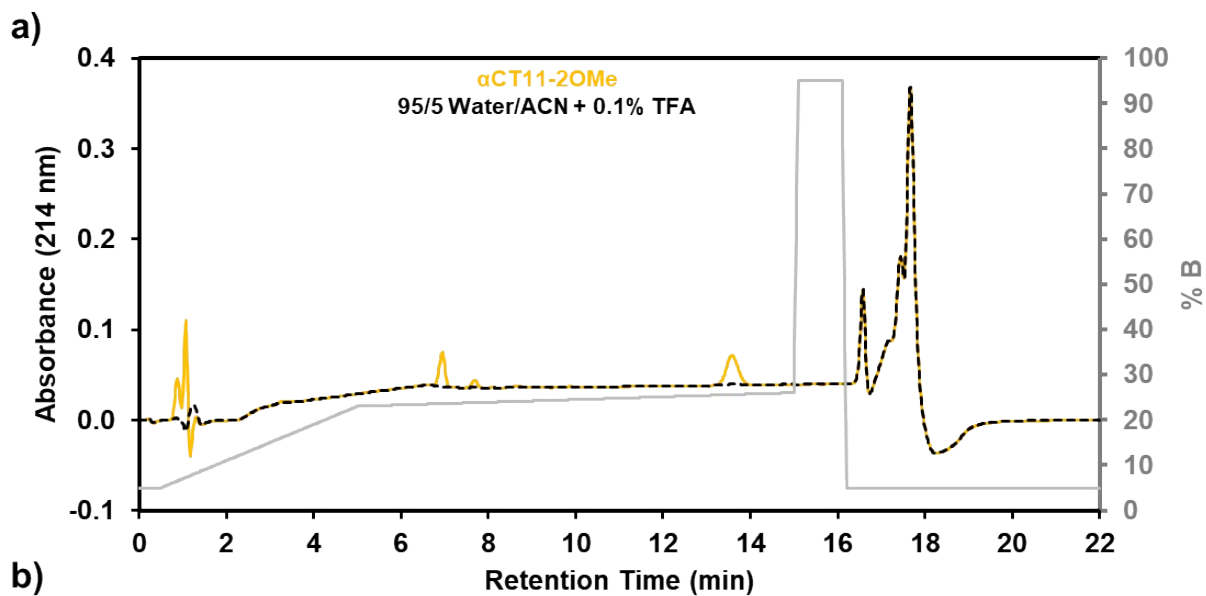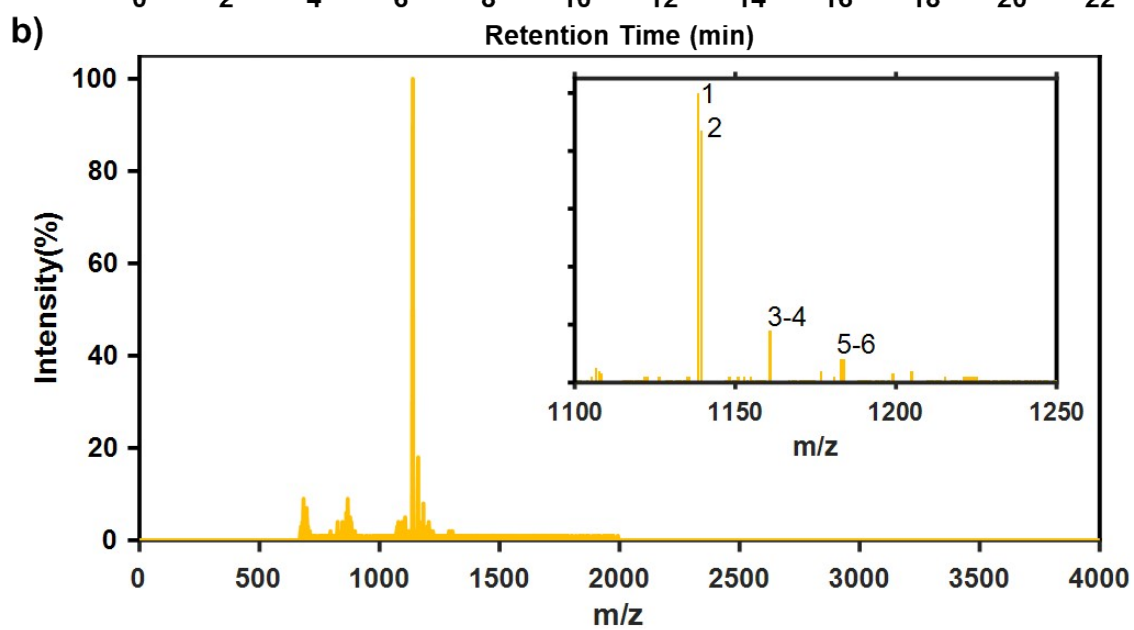

| label | Mass (Da) | Intensity (%) | Species                                      |
|-------|-----------|---------------|----------------------------------------------|
| 1     | 1138.5    | 100           | [ $\alpha$ CT11-2OMe + H] <sup>+</sup>       |
| 2     | 1139.5    | 87            |                                              |
| 3     | 1160.8    | 18            | [ $\alpha$ CT11-2OMe + Na] <sup>+</sup>      |
| 4     | 1161.6    | 18            |                                              |
| 5     | 1182.8    | 8             | [ $\alpha$ CT11-2OMe + 2Na - H] <sup>+</sup> |
| 6     | 1183.7    | 8             |                                              |

Figure S8: a) RP-HPLC chromatogram and b) MALDI-TOF MS of  $\alpha$ CT11-2OMe.

## **Section S2: Establishing ester position with 2D nuclear magnetic resonance (NMR) spectroscopy**

To assign the methyl ester  $\alpha$ CT11-4OMe protons and carbons (**Figure S9**), we used 1D  $^1\text{H}$  (**Figure S10-12**) and  $^{13}\text{C}$  (**Figure S13**) spectra together with 2D H-H total correlation spectroscopy (TOCSY, **Figures S14-15**), H-H nuclear Overhauser effect spectroscopy (NOESY, **Figure S16**), H-H clean in-phase correlation spectroscopy (CLIP COSY, **Figures S17-20**), and H-C heteronuclear multiple bond correlation (HMBC, **Figures S21-24**). For reference, the H and C chemical shifts and the H integrations and numbers are listed in **Table S4**. Towards assigning the D5 and D6  $\text{C}_\gamma$ , E8  $\text{C}_\delta$ , and I9 C carbonyls in the  $^{13}\text{C}$  spectrum for correlation with the methyl ester proton resonances, we first used TOCSY to separate each H resonance into their individual spin system, which contains all the H resonances connected in a continuous chain of protonated nuclei. For example, the D5 C backbone carbonyl is not bound to a proton and therefore serves as a spin system boundary, separating the D5 and D6 spin systems. Conveniently, the H resonances within a given amino acid are in the same spin system. **Therefore, we assigned some of the amide/amine proton resonances (HN,  $\text{H}_\epsilon$ , 7.7 – 8.3 ppm) as belonging to either a R, D, E, or L/I residue spin system by considering the number of backbone-sidechain correlations with H resonances between 0 – 4.7 ppm (Figure S14).** For example, we found the E8 HN (7.91 ppm) to have 4 unique correlations: 1 in the  $\text{H}_\alpha$  region (4.0 – 4.7 ppm), 1 around the expected shift of the E8  $\text{H}_\gamma$  resonance (2.32 ppm), and 2 around the expected shifts of the E8  $\text{H}_\delta$  resonances ( $\sim$ 1.8 ppm). **However, we were unable to distinguish between R1 and R3, D5 and D6, or L7 and I9 resonances due to the similar number and chemical shifts of these correlations in the TOCSY spectrum. We assigned the R1 HN (8.17 ppm) because the amine-water H exchange caused it to appear as a broad singlet instead of a doublet split by the adjacent  $\text{H}_\alpha$ . The TOCSY spectrum also showed HN -  $\text{H}_\epsilon$  correlations for both R1 and R3 in the amide/amine region of the spectrum, allowing us to assign the R1 and R3 HN (8.17 and 8.24 ppm) and  $\text{H}_\epsilon$  (7.83 and 7.71 ppm) resonances (Figure S15).**

To assign the D5, D6, L7, and I9 Hs, we next used NOESY, which shows correlations between protons that are close to each other in space, suspecting it would reveal interactions between amide/amine protons on adjacent amino acids. We observed a correlation in the amide/amine (HN and R  $\text{H}_\epsilon$ ) region (7.7 – 8.3 ppm) of the NOESY spectrum (**Figure S16**) between what TOCSY showed to be either the D5 or D6 HN and either the L7 or I9 HN. Because D6 is next to L7 in the peptide sequence, this correlation allowed us to assign the D6 and L7 HN, and by the process of elimination D5 and I9 Hs. **In all, NOESY revealed D5-D6, D6-L7, L7-E8, and E8-I9 HN-HN correlations, which allowed us to assign the remaining HN resonances.**

With the HNs and  $\text{H}_\epsilon$  resonances assigned, we next moved to COSY, which displays correlations between protons on adjacent nuclei, with the goal of assigning the I9  $\text{H}_\alpha$  (4.17 ppm) and the D5/D6  $\text{H}_\beta$ s (2.57 – 2.75 ppm), which were each 3 bonds away from their respective methyl ester carbonyl Cs, and could therefore be used to assign said carbonyl Cs with selHMBC. To enhance the signal intensities, we used CLIP COSY.

To assign the H $\alpha$  resonances, we plotted the now assigned H $\delta$  and H $\epsilon$  region (7.7 – 8.3 ppm) against the H $\alpha$  region (4.0 – 4.7 ppm) (Figure S17), where correlations allowed us to assign the D5 H $\alpha$  (4.54 ppm), D6 H $\alpha$  (4.58 ppm), E8 H $\alpha$  (4.32 ppm), and I9 H $\alpha$  (4.17 ppm) resonances. We also used CLIP-COSY correlations to assign the D5/D6 H $\beta$ s (2.57 – 2.75 ppm) through their respective correlations with the now-assigned H $\alpha$  region (4.0 - 4.7 ppm) (Figure S18). The D5 and D6 H $\alpha$  protons split the adjacent H $\beta$  resonances, and CLIP-COSY showed each of part of the split D5 and D6 H $\beta$  resonances to correlate with the respective H $\alpha$  resonances. **After assigning the E8 H $\alpha$  resonance, we were able to assign the E8 H $\beta$  resonances (1.8 and 1.90 ppm) (Figure S19) and, subsequently, the E8 H $\gamma$  resonance (2.32 ppm) (Figure S20) through their respective correlations.**

Finally, to assign the carbonyl Cs in the  $^{13}\text{C}$  spectrum of  $\alpha\text{CT11-4OMe}$ , we used selHMBC, which measures correlations between protons and carbons separated by 2-4 bonds within a specified region of the spectrum, as HMBC did not offer enough resolution in the  $^{13}\text{C}$  dimension to confidently assign each peak, specifically the D5 and D6 C $\gamma$  resonances (Figure S21). As a reference for the  $\alpha\text{CT11-4OMe}$  selHMBC spectrum, which was collected only in the carbonyl region (165 – 175 ppm), we used the L7 H $\alpha$ -carbonyl C correlation (4.25-171.61 ppm) (Figure S22). As we had already assigned the relevant I9 H $\alpha$  resonance, the D5/D6 H $\beta$  resonances, and the E $_8$  H $\gamma$  resonances, we used observed correlations in selHMBC to assign the respective carbonyl Cs, specifically the D5/D6 C $\gamma$ , E8 C $\delta$ , and I9 Cs. **Plotting the H $\alpha$  region of the  $^1\text{H}$  spectrum (4.0 – 4.7 ppm) against carbonyl C region of the  $^{13}\text{C}$  spectrum, in which we observed H $\alpha$  - C correlations, allowed us to assign the D5 C (170.23 ppm), D5 C $\gamma$  (170.68 ppm), D6 C (169.75), D6 C $\gamma$  (170.68 ppm), and I9 C (171.76) resonances (Figure S23).** The observed methyl ester -OCH $_3$  - C $\gamma$  correlations (Figure 1i) allowed us to distinguish the D6 backbone and side chain carbonyls, the former of which was 6 bonds away from the methyl ester -OCH $_3$ , and would not have produced a selHMBC correlation. **We then used the E8 H $\gamma$  - C $\delta$  correlation to assign the E8 C $\delta$  resonance (Figure S24).** After assigning all the relevant carbonyl C resonances, we were then able to use their selHMBC correlations with their respective D5, D6, E8, and I9 methyl ester -OCH $_3$  resonances to assign each singlet in the  $\alpha\text{CT11-4OMe}$   $^1\text{H}$  spectrum (Figure 1i).

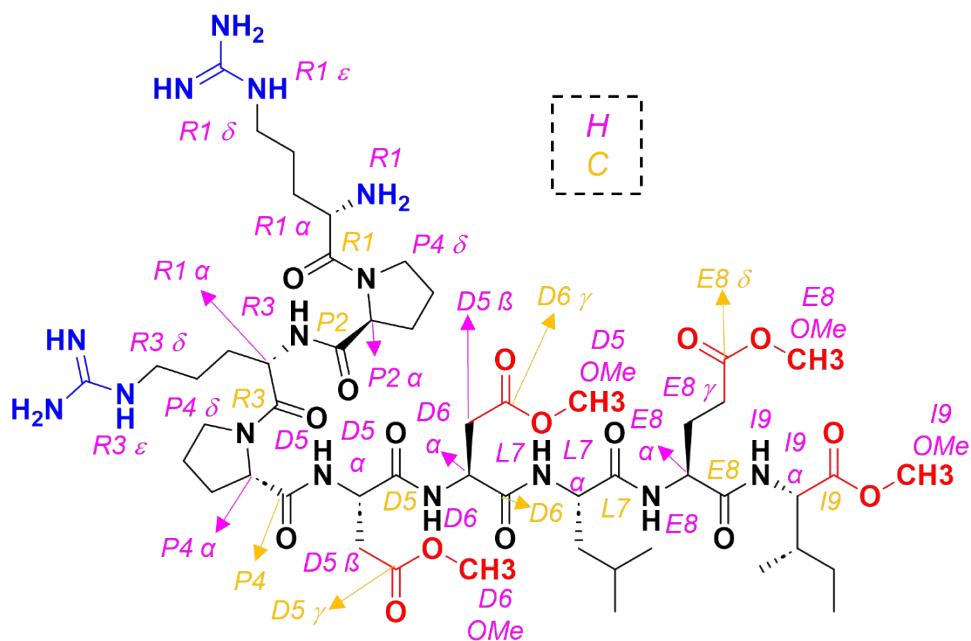

**Figure S9.** Chemical structure of  $\alpha$ CT11-4OMe. Relevant  $^1\text{H}$  (pink) and  $^{13}\text{C}$  (yellow) atoms are labeled within the structure, and ester groups (red) and positively charged groups (blue) are also highlighted.

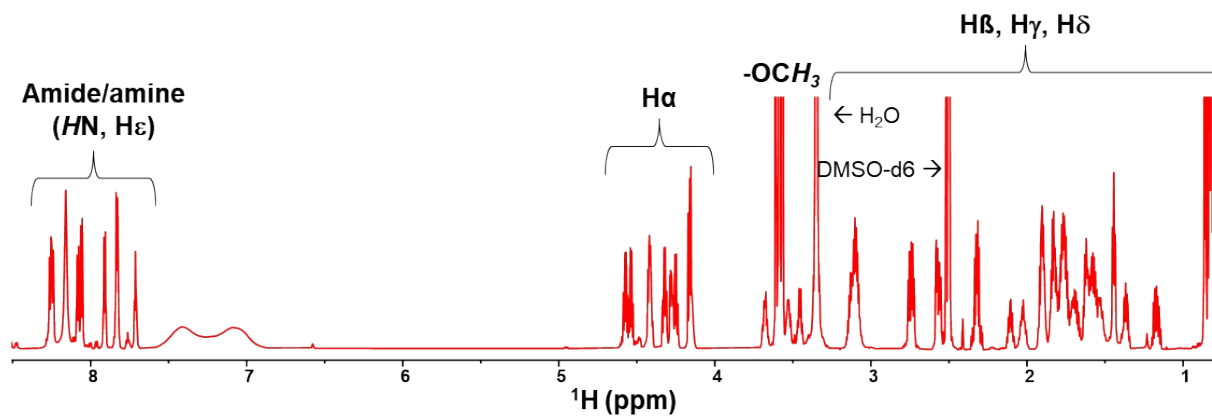

**Figure S10.**  $^1\text{H}$  NMR spectrum of  $\alpha$ CT11-4OMe (0.75 – 8.50 ppm).

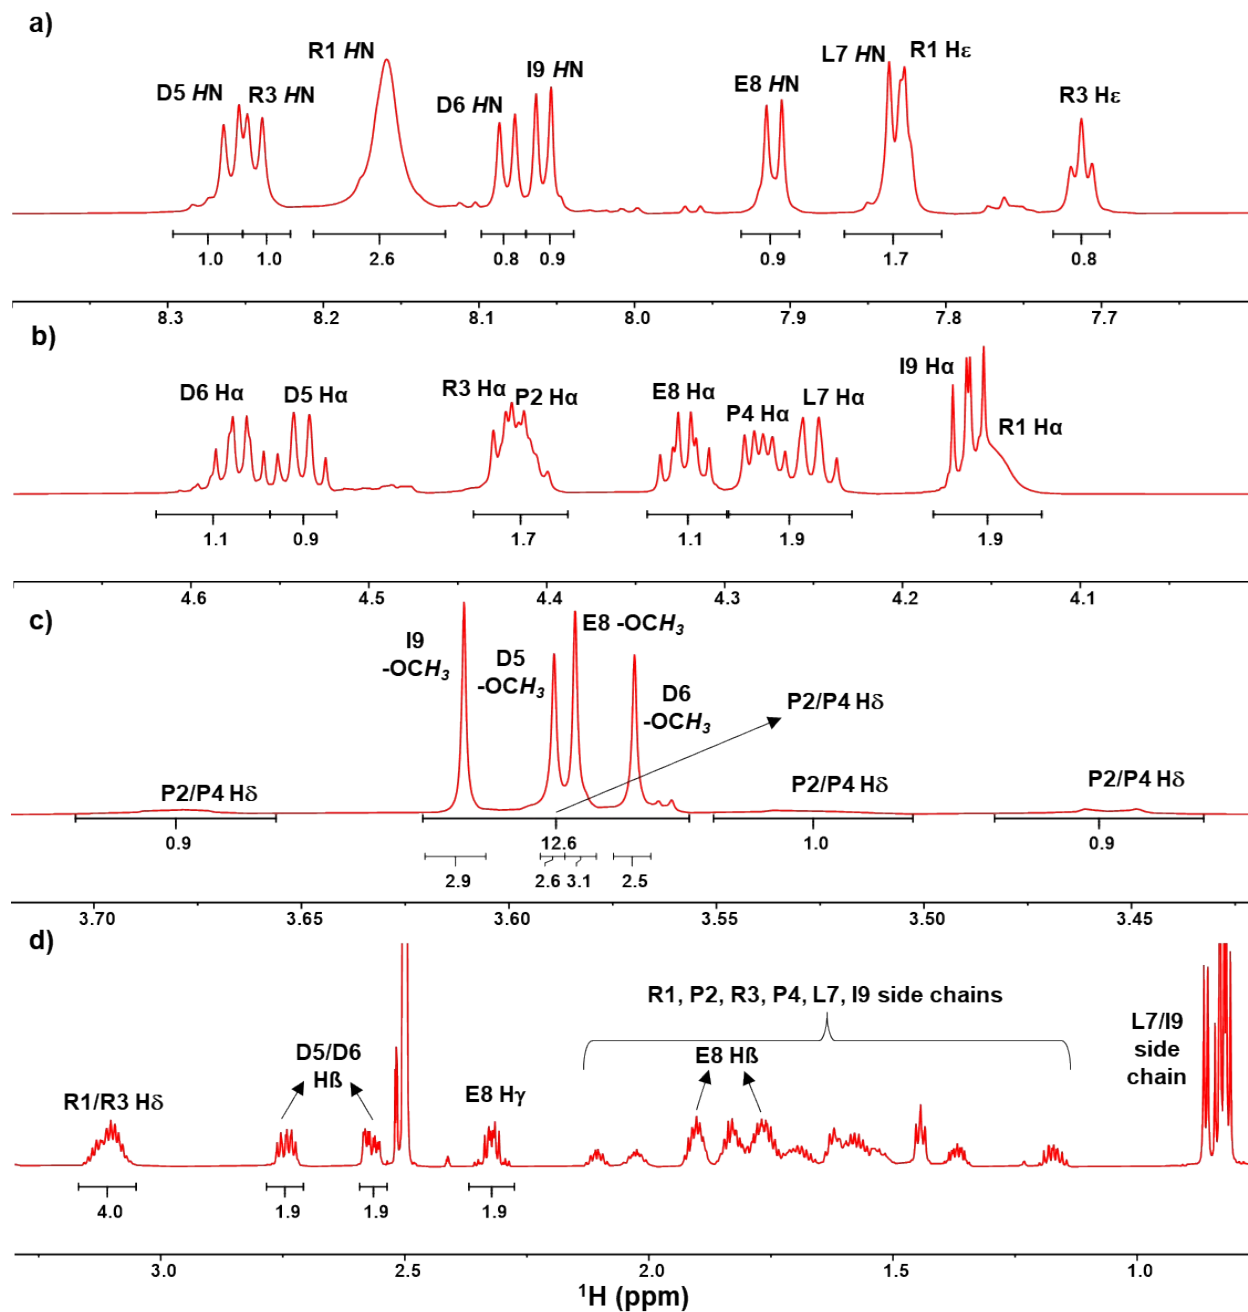

**Figure S11.** Expanded select regions of the  $\alpha$ CT11-4OMe  $^1\text{H}$  NMR spectrum. The **a)** amide/amine (HN, H $\epsilon$ ) (7.6 – 8.4 ppm), **b)** H $\alpha$  (4.0 – 4.7 ppm), **c)** methyl ester H(-OCH<sub>3</sub>) and proline H $\delta$  (3.4 – 3.7 ppm), and **d)** the H $\beta$ , H $\gamma$ , and H $\delta$  (0.75 – 3.50 ppm) regions are shown.

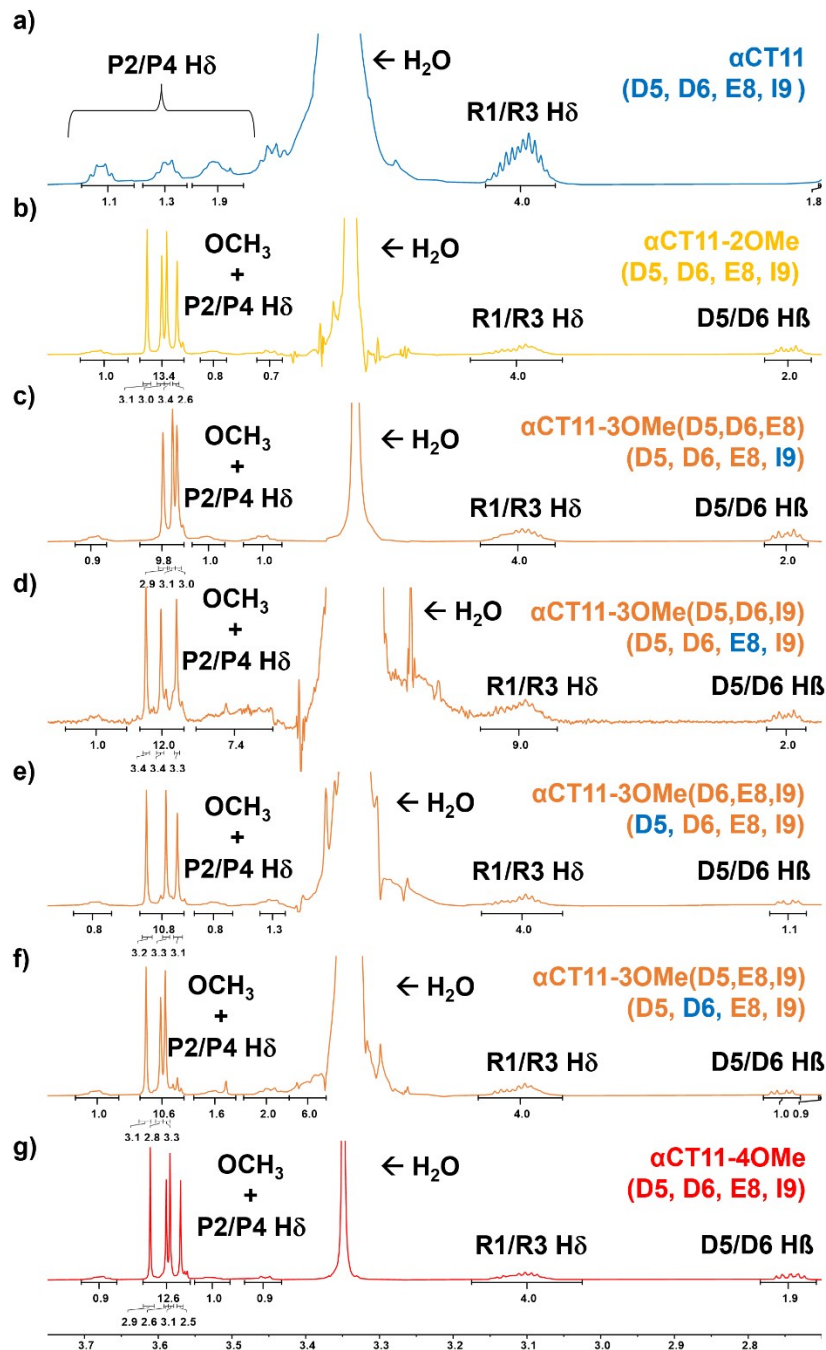

**Figure S12.**  $^1\text{H}$  NMR spectrum of  $\alpha\text{CT11}$  and esterified variants (2.7 – 3.75 ppm). Only proline  $\text{H}\delta$  resonances were observed in the region that methyl ester  $\text{H}$  singlets were observed in the esterified  $^1\text{H}$  spectra (3.55 – 3.64 ppm). For each esterified spectrum, both the total methyl ester  $\text{H}$  region and the individual peaks were integrated to show the presence of the proline  $\text{H}\delta$  proline, which is overlapped by the methyl ester  $\text{H}$  singlets. All methyl ester peaks integrate to 3 protons; however, in (d-f) the  $\alpha\text{CT11-3OMe}$  samples with an esterified I9 residue, lower concentrations of sample led to higher baseline noise and slightly higher integrals than expected (9 methyl ester  $\text{H}$ s + 1 proline  $\text{H}\delta$  = 10  $\text{H}$ s). The  $\alpha\text{CT11-2OMe}$  spectrum contained peaks from all the possible esterified methyl esters, suggesting this product is a mixture of  $\alpha\text{CT11}$  with different combinations of 2 methyl esters esterified.

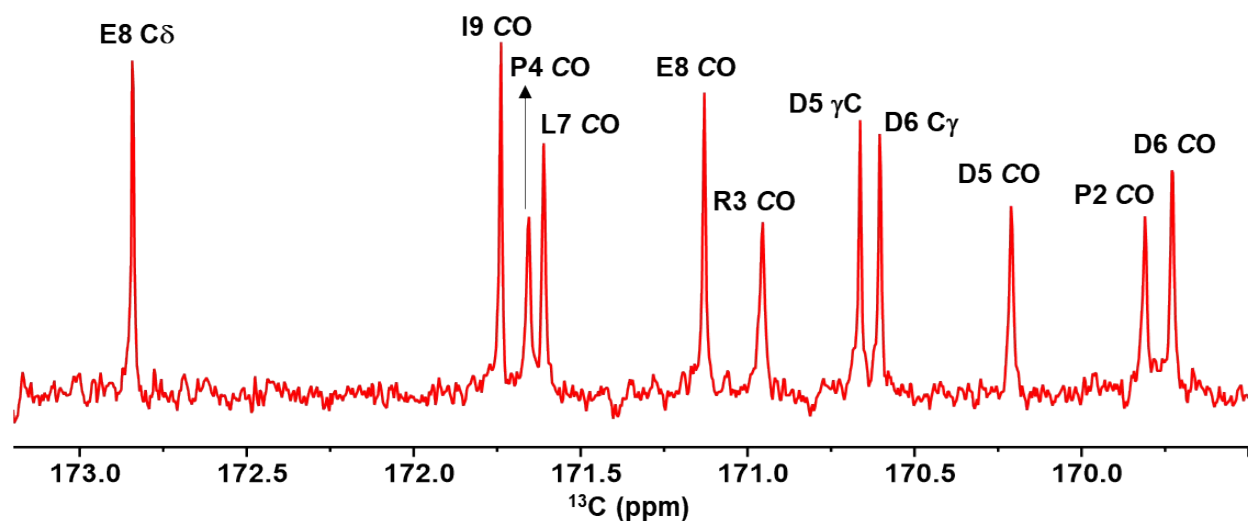

**Figure S13.** Carbonyl carbon region of the  $\alpha$ CT11-4OMe  $^{13}\text{C}$  NMR spectrum (169.5 – 173.2 ppm).

**Table S4.** Chemical shifts of relevant  $^1\text{H}$  and  $^{13}\text{C}$  in  $\alpha$ CT11-4OMe

| Amino Acid | Atom         | Chemical Shift (ppm) | Integral         | # of protons |
|------------|--------------|----------------------|------------------|--------------|
| R1         | HN           | 8.17                 | 2.6              | 3            |
|            | H $\alpha$   | 4.17                 | 1.0              | 1            |
|            | H $\delta$   | 3.11                 | 2*               |              |
|            | H $\epsilon$ | 7.83                 | 0.9              | 1            |
| P2         | H $\alpha$   | 4.41                 | 0.9              | 1            |
|            | H $\delta$   | 3.68 - 3.45          | Not isolatable** |              |
|            | CO           | 169.83               | N/A              | N/A          |
| R3         | HN           | 8.24                 | 1.0              | 1            |
|            | H $\alpha$   | 4.41                 | 0.9              | 1            |
|            | H $\delta$   | 3.11                 | 2*               |              |
|            | H $\epsilon$ | 7.71                 | 0.8              | 1            |
|            | CO           | 170.98               | N/A              |              |
| P4         | H $\alpha$   | 4.29                 | 1.0              | 1            |
|            | H $\delta$   | 3.68 - 3.45          | Not isolatable** |              |
|            | CO           | 171.68               | N/A              | N/A          |
| D5         | HN           | 4.54                 | 1.0              | 1            |
|            | H $\alpha$   | 4.54                 | 0.9              | 1            |
|            | H $\beta$    | 2.75                 | 1.0              | 1            |
|            |              | 2.57                 | 1.0              | 1            |
|            | CO           | 170.23               | N/A              |              |
|            | C $\gamma$   | <b>170.68</b>        | <b>N/A</b>       |              |
|            | OCH $_3$     | <b>3.59</b>          | <b>2.6</b>       | <b>3</b>     |
| D6         | HN           | 8.08                 | 0.8              | 1            |
|            | H $\alpha$   | 4.58                 | 1.1              | 1            |
|            | H $\beta$    | 2.75                 | 1.0              | 1            |
|            |              | 2.57                 | 1.0              | 1            |
|            | CO           | 169.75               | N/A              |              |
|            | C $\gamma$   | <b>170.62</b>        | <b>N/A</b>       |              |
|            | OCH $_3$     | <b>3.57</b>          | <b>2.5</b>       | <b>3</b>     |



|                  |                  |        |                   |   |
|------------------|------------------|--------|-------------------|---|
| L7               | HN               | 7.83   | 0.9               | 1 |
|                  | H $\alpha$       | 4.24   | 1.0               | 1 |
|                  | CO               | 171.63 | N/A               |   |
| E8               | HN               | 7.91   | 0.9               | 1 |
|                  | H $\alpha$       | 4.32   | 1.1               | 1 |
|                  | H $\gamma$       | 2.32   | 1.9               | 2 |
|                  | H $\beta$        | 1.90   | Not isolatable*** | - |
|                  |                  | 1.77   | Not isolatable*** | - |
|                  | CO               | 171.15 | N/A               |   |
|                  | C $\delta$       | 172.86 | N/A               |   |
| OCH <sub>3</sub> | 3.58             | 3.1    | 3                 |   |
| I9               | HN               | 8.06   | 0.9               | 1 |
|                  | H $\alpha$       | 4.17   | 1.0               | 1 |
|                  | CO               | 171.76 | N/A               |   |
|                  | OCH <sub>3</sub> | 3.61   | 2.9               | 3 |

\*Set as the reference integration

\*\*Peak was either not able to be individually assigned (P2/P4 H $\delta$ )

\*\*\*Peaks were not able to be integrated separately from neighboring peaks (E8 H $\beta$ )

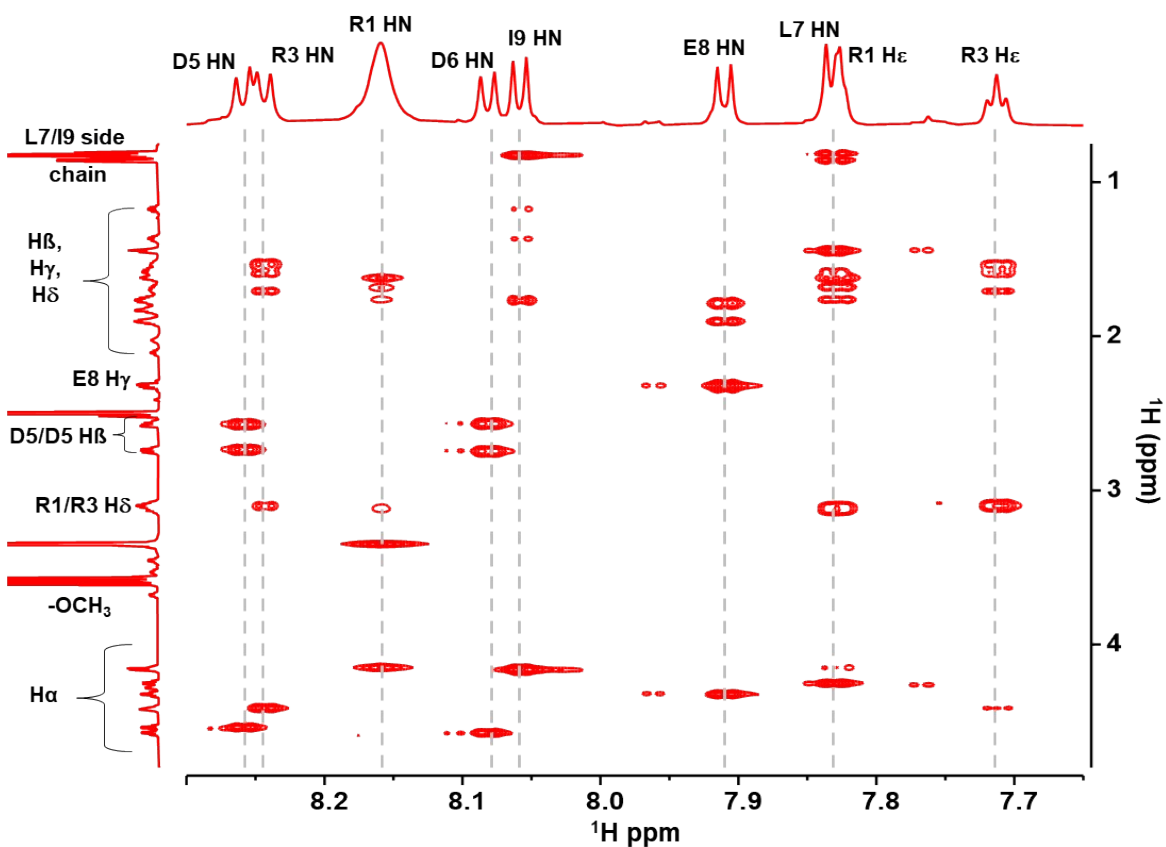

**Figure S14.** Total correlation spectroscopy (TOCSY) of  $\alpha$ CT11-4OMe: HN & H $\epsilon$  region (7.65 – 8.3 ppm) x H $\alpha$ , H $\beta$ , H $\gamma$ , H $\delta$ , and methyl ester H region (0.75 – 4.7 ppm). Dashed vertical lines are shown to guide the eye along the spin systems of the peptide, which were used to assign the HN and H $\epsilon$  resonances (x-axis).

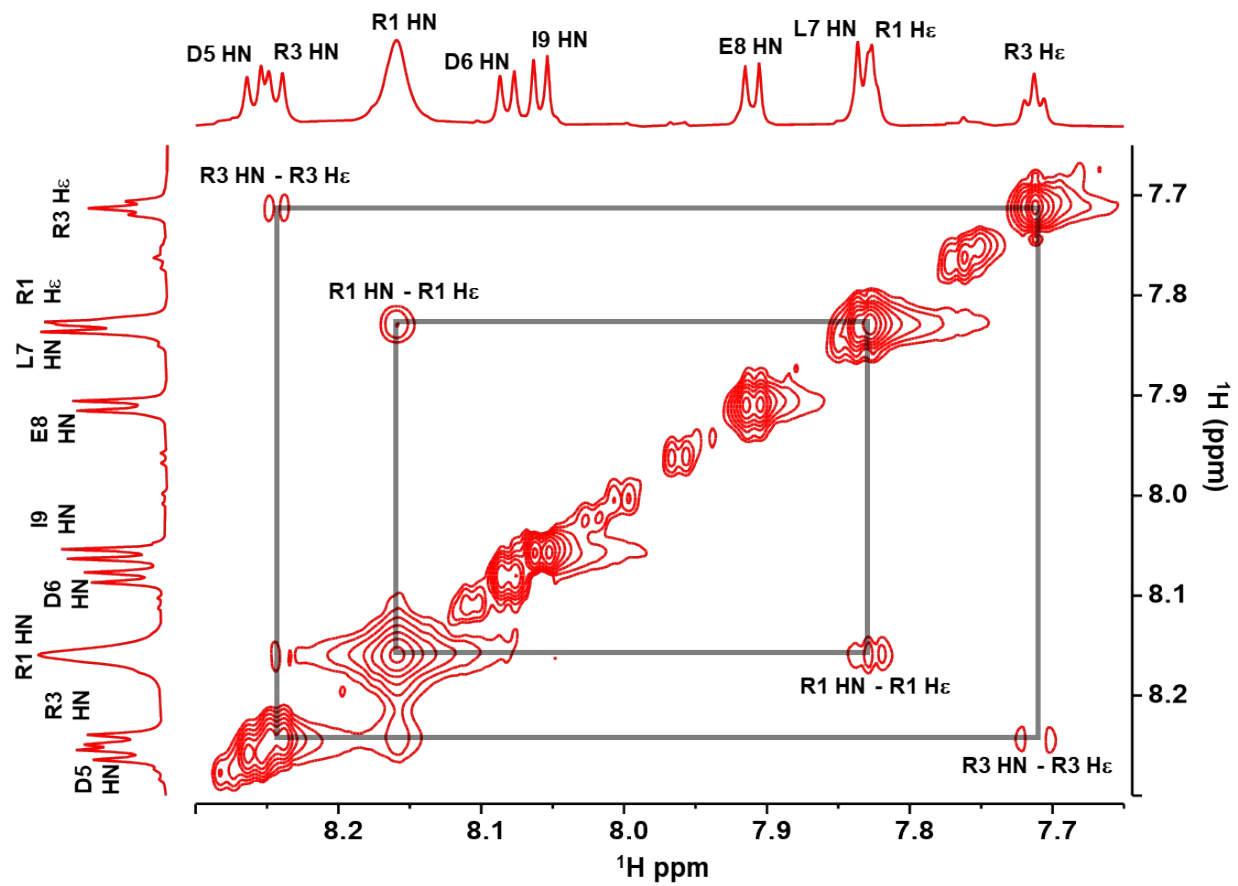

**Figure S15.** TOCSY of  $\alpha$ CT11-4OMe: HN & H $\epsilon$  region (7.65 – 8.30 ppm) x HN & H $\epsilon$  region. Correlations between the R1/R3 HN – H $\epsilon$  correlations were used to assign R1 and R3 HN and H $\epsilon$  resonances.

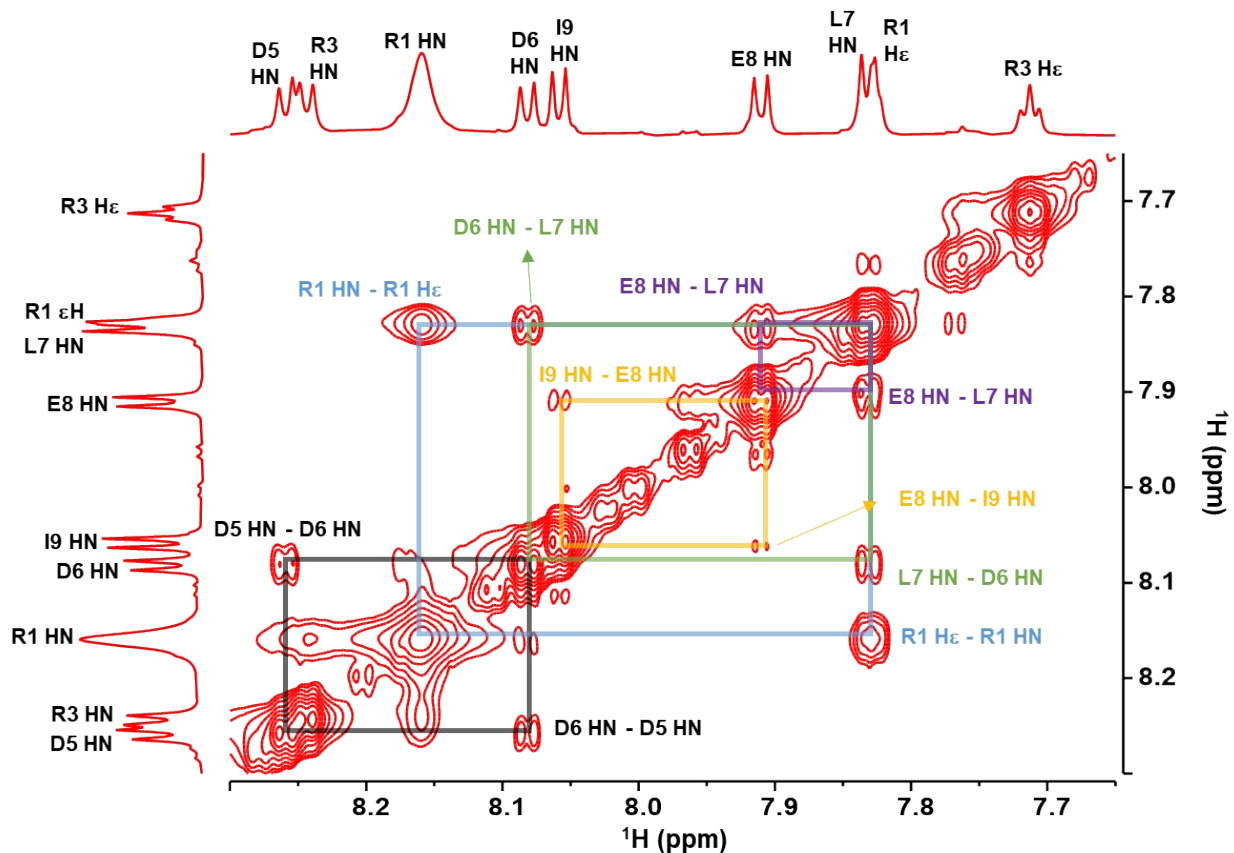

**Figure S16.** Nuclear Overhauser spectroscopy (NOESY) of  $\alpha$ CT11-4OMe: HN & H $\epsilon$  region (7.65 – 8.30 ppm) x HN & H $\epsilon$  region. R1 HN - R1 H $\epsilon$  (blue), D6 HN - L7 HN (green), and D5 HN - D6 HN (black) correlations were observed, with the latter 2 correlations being used assign the D5, D6, L7, and I9 HNs.

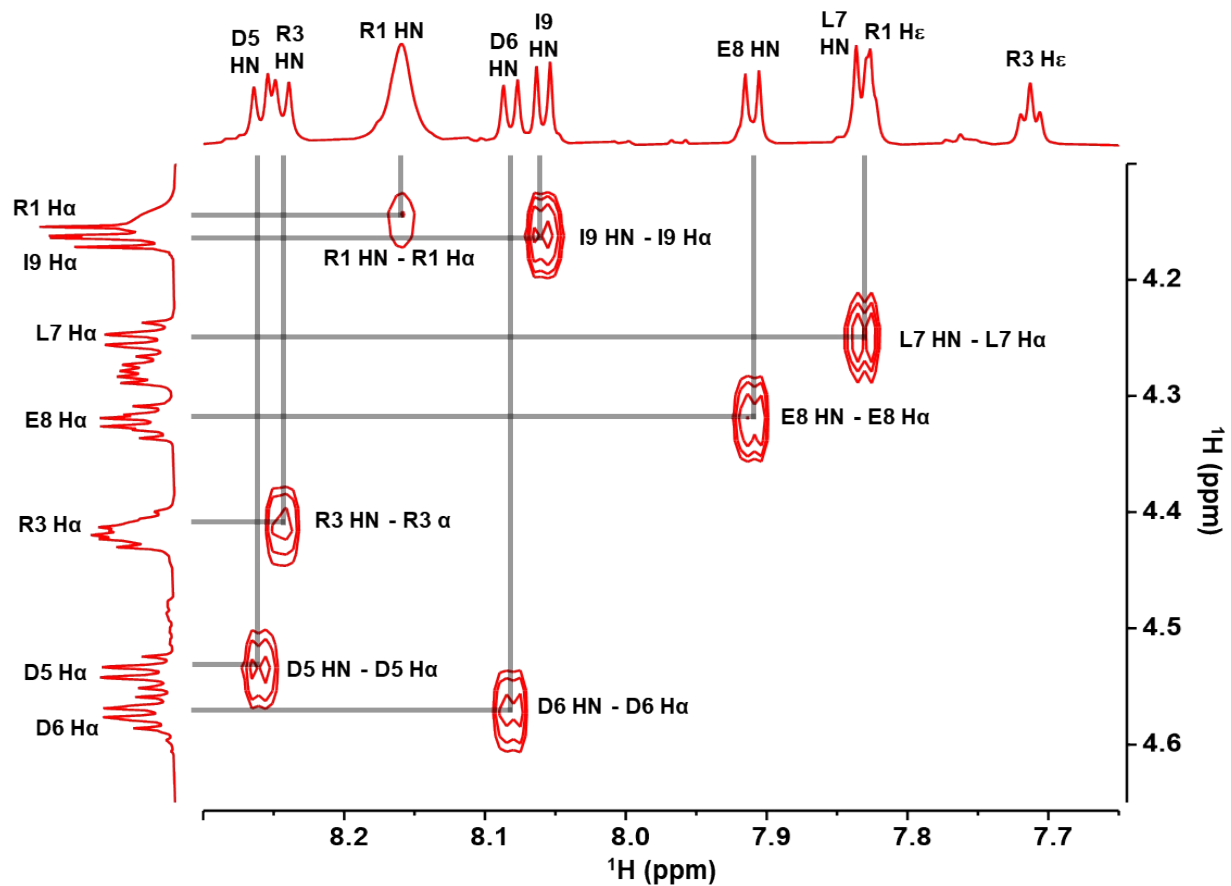

**Figure S17.** Clean in-phase correlation spectroscopy (CLIP COSY) of  $\alpha$ CT11-4OMe:  $HN$  &  $H_{\epsilon}$  region (7.65 – 8.30 ppm) x  $H_{\alpha}$  region (4.10 – 4.65 ppm).  $HN$  –  $H_{\alpha}$  correlations were used to assign the  $H_{\alpha}$  resonances.

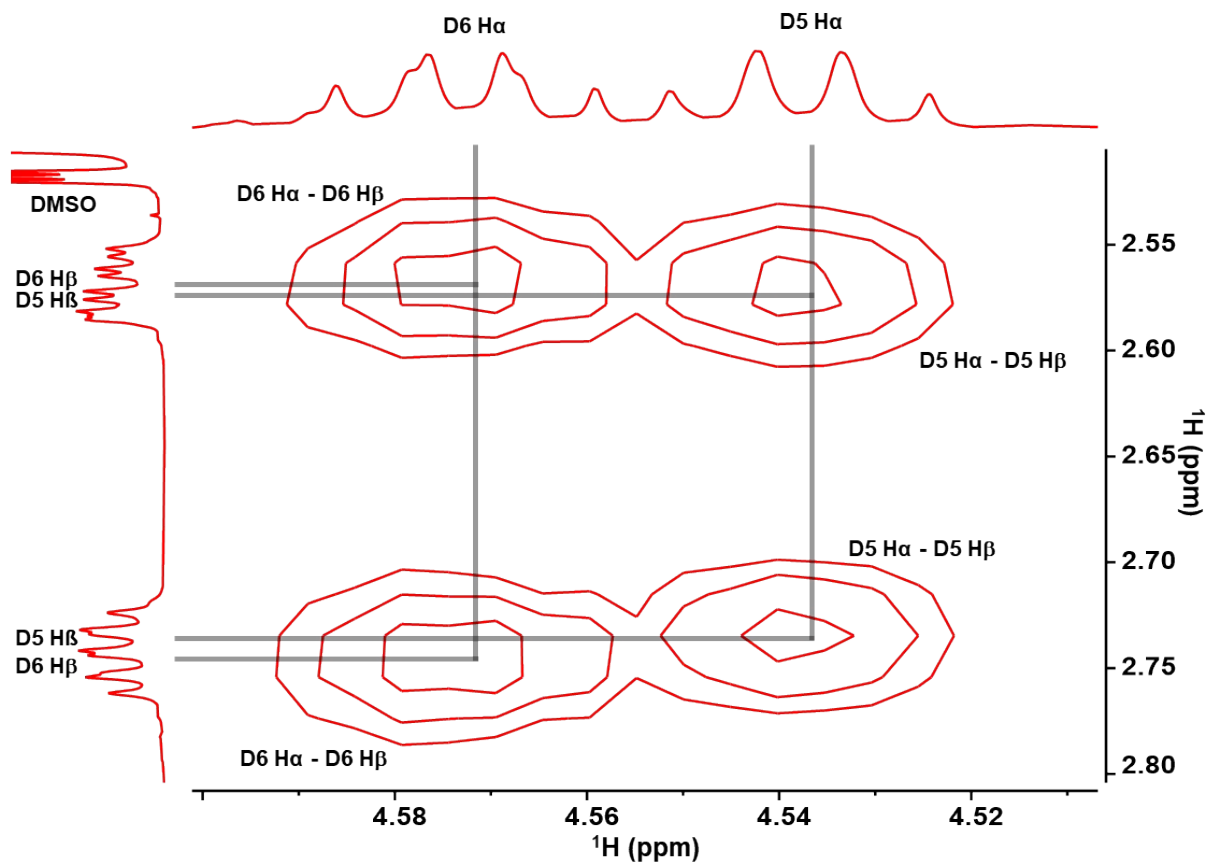

**Figure S18.** CLIP COSY of  $\alpha\text{CT11-4OMe}$ : D5 & D6 H $\alpha$  resonance region (4.5 – 4.6 ppm) x D5 & D6 H $\beta$  resonance region (2.5 – 2.8 ppm). The D5 and D6 H $\alpha$  protons split the adjacent H $\beta$  resonances, and this CLIP-COSY spectrum showed each of part of the split D5 and D6 H $\beta$  resonances to correlate with the respective H $\alpha$  resonances.

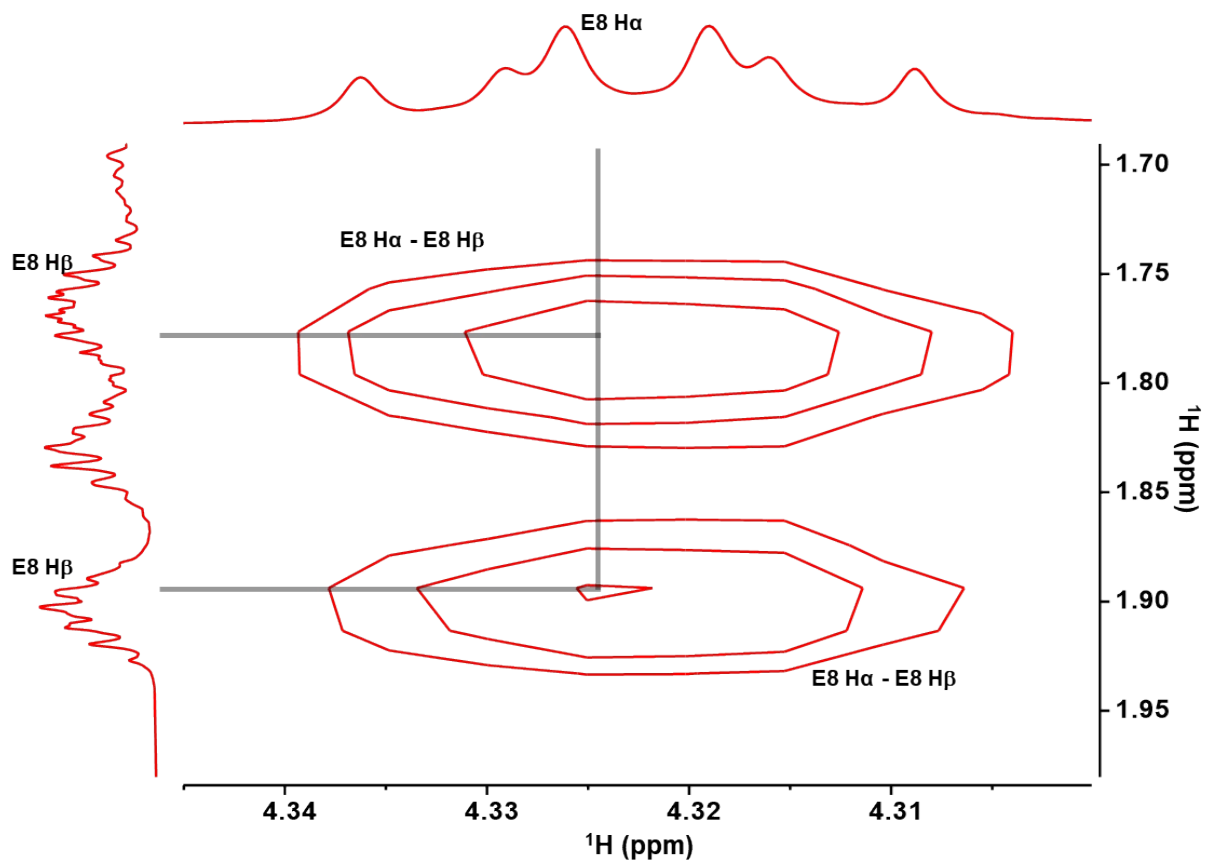

**Figure S19.** CLIP COSY of  $\alpha$ CT11-4OMe: E8 H $\alpha$  resonance region (4.31 – 4.34 ppm) x the E8 H $\beta$  region (1.70 – 1.95 ppm), with E8 H $\alpha$  – H $\beta$  correlations allowing for the assignment of the 2 E8 H $\beta$  resonances.

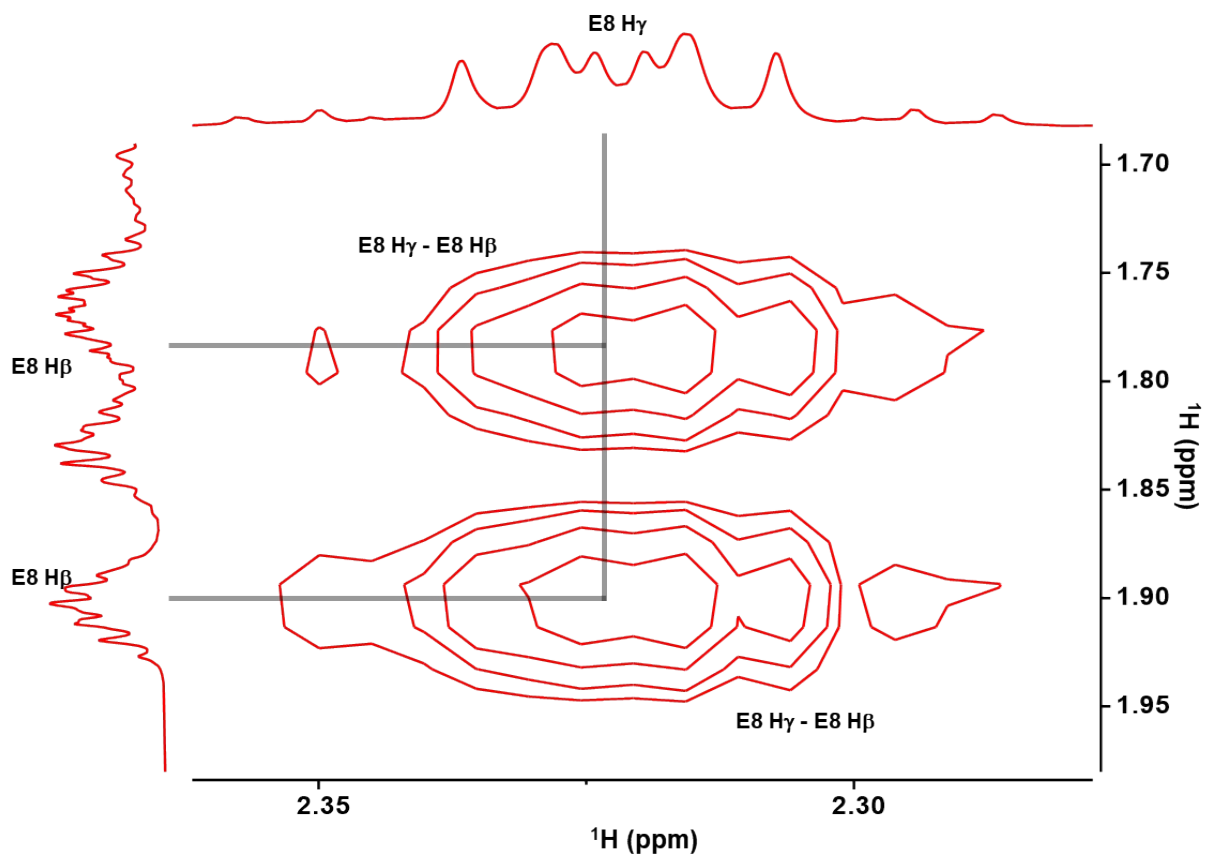

**Figure S20.** CLIP COSY of  $\alpha\text{CT11-4OMe}$ : E8 H $\gamma$  resonance region (2.30 – 2.35 ppm) x E8 H $\beta$  resonance region (1.70 – 1.95 ppm), with the E8 H $\gamma$  - H $\beta$  correlations allowed for the assignment of the E8 H $\gamma$  resonance.

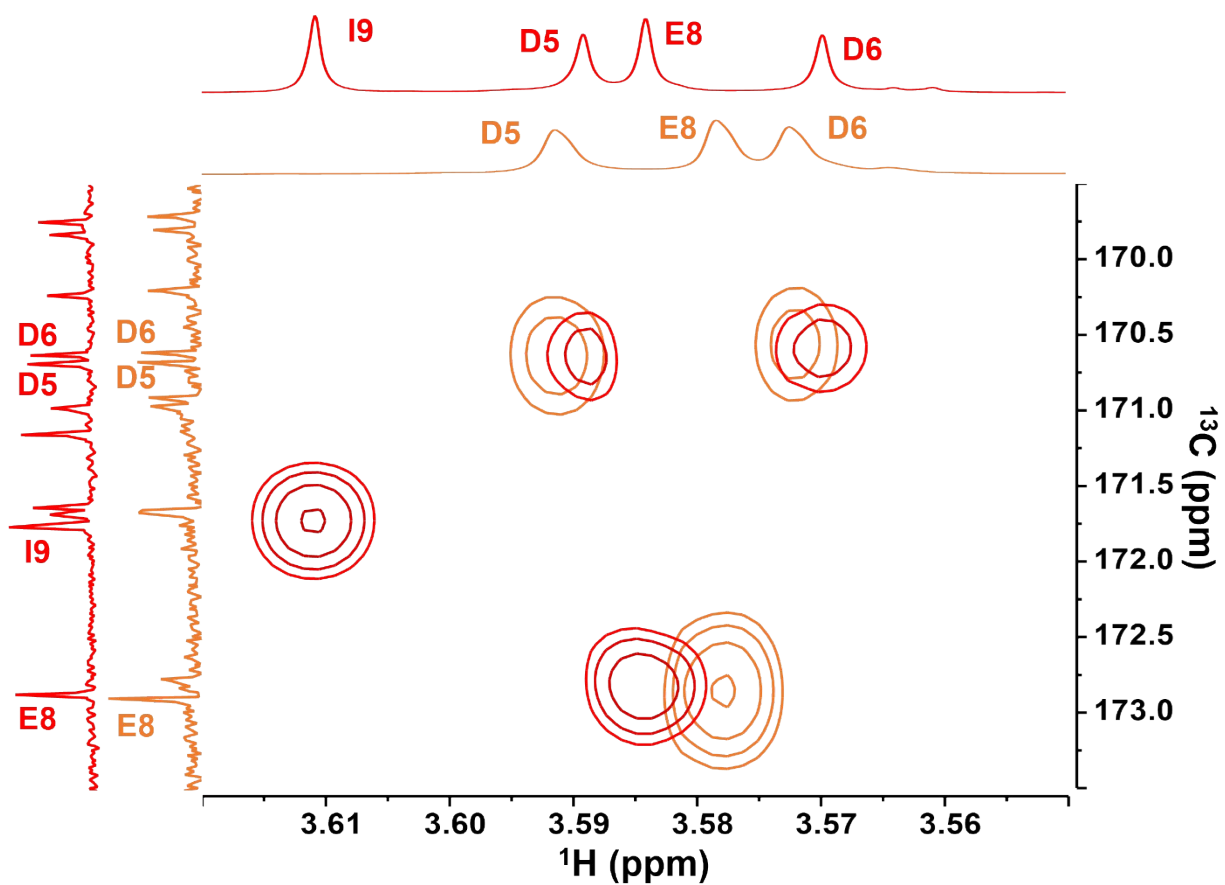

**Figure S21.** Heteronuclear multiple bond correlation (HMBC) of  $\alpha\text{CT11-4OMe}$ : methyl ester H singlet region (3.55 – 3.62 ppm) x carbonyl C region (169 – 173 ppm). Correlations did not have high enough resolution in the  $^{13}\text{C}$  region to discern between methyl ester H correlations with the D5 and D6  $\text{C}_\gamma$  resonances.



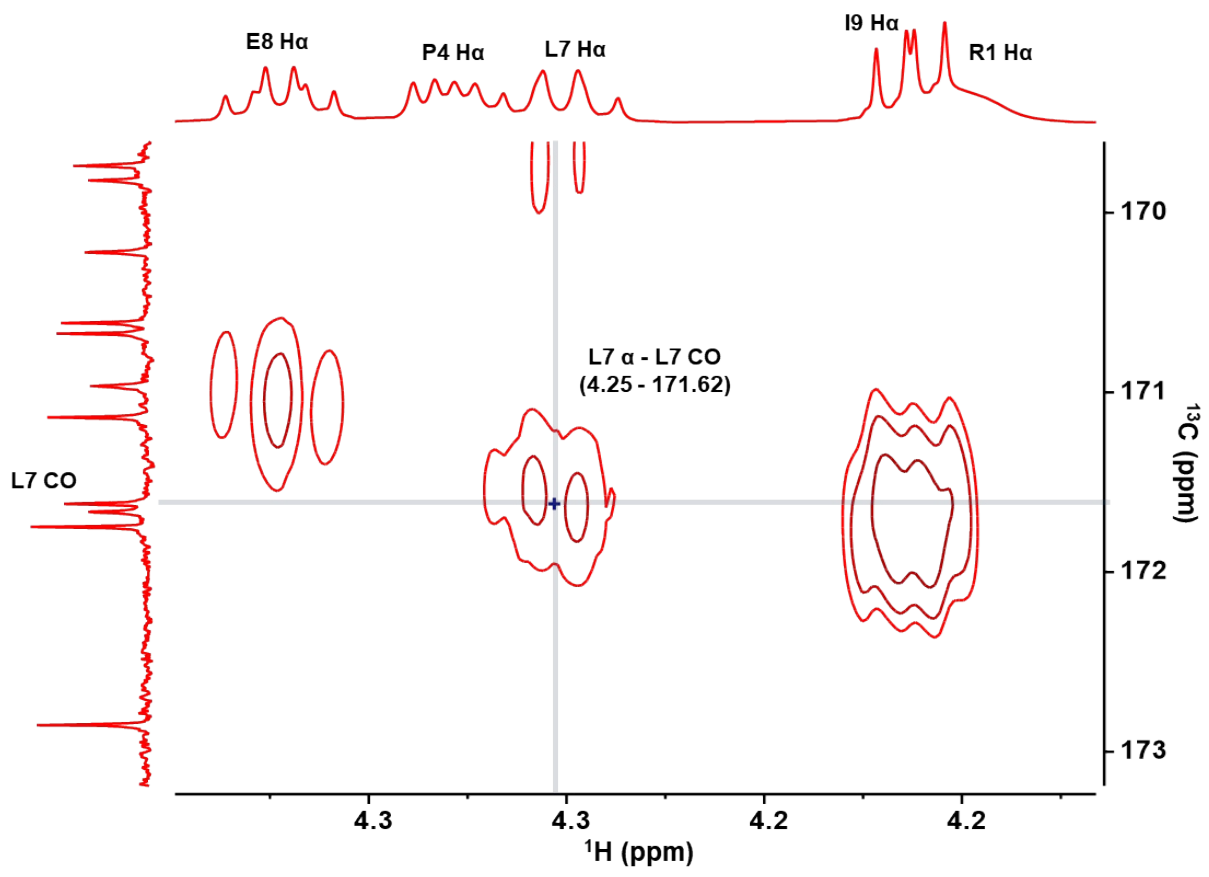

**Figure S22.** HMBC of  $\alpha\text{CT11-4OMe}$ : H $\alpha$  region (4.1 – 4.4 ppm) x carbonyl C region (169 – 173 ppm). The L7 H $\alpha$  – L7 CO correlation (at 4.25 – 171.62 ppm) is highlighted, and was used to reference all of the selective HMBC (selHMBC) spectra.

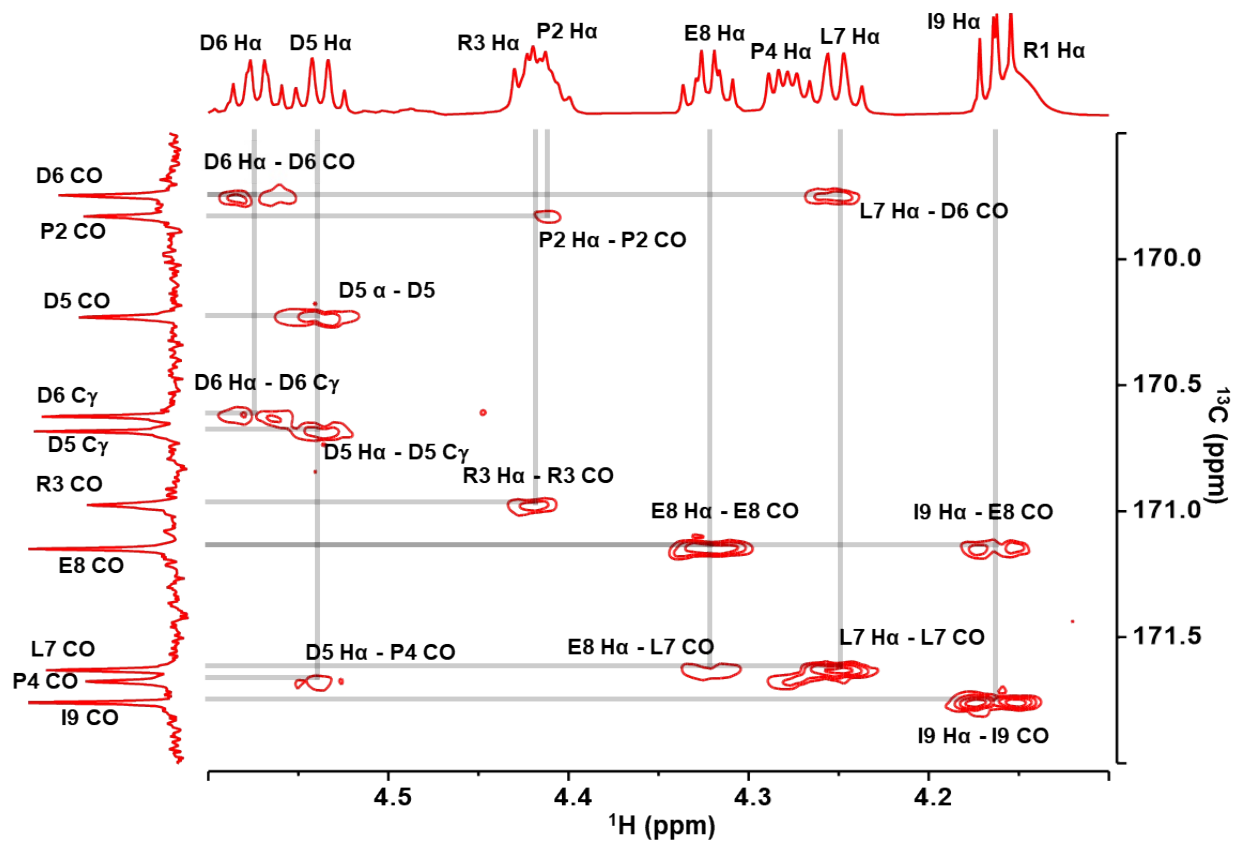

**Figure S23.** selHMBC of  $\alpha$ CT11-4OMe: H $\alpha$  region (4.1 – 4.6 ppm) x carbonyl C region (169 – 172 ppm). H $\alpha$  – CO and D5/D6 H $\alpha$  – C $\gamma$  correlations were used to assign relevant CO and C $\gamma$  resonances.

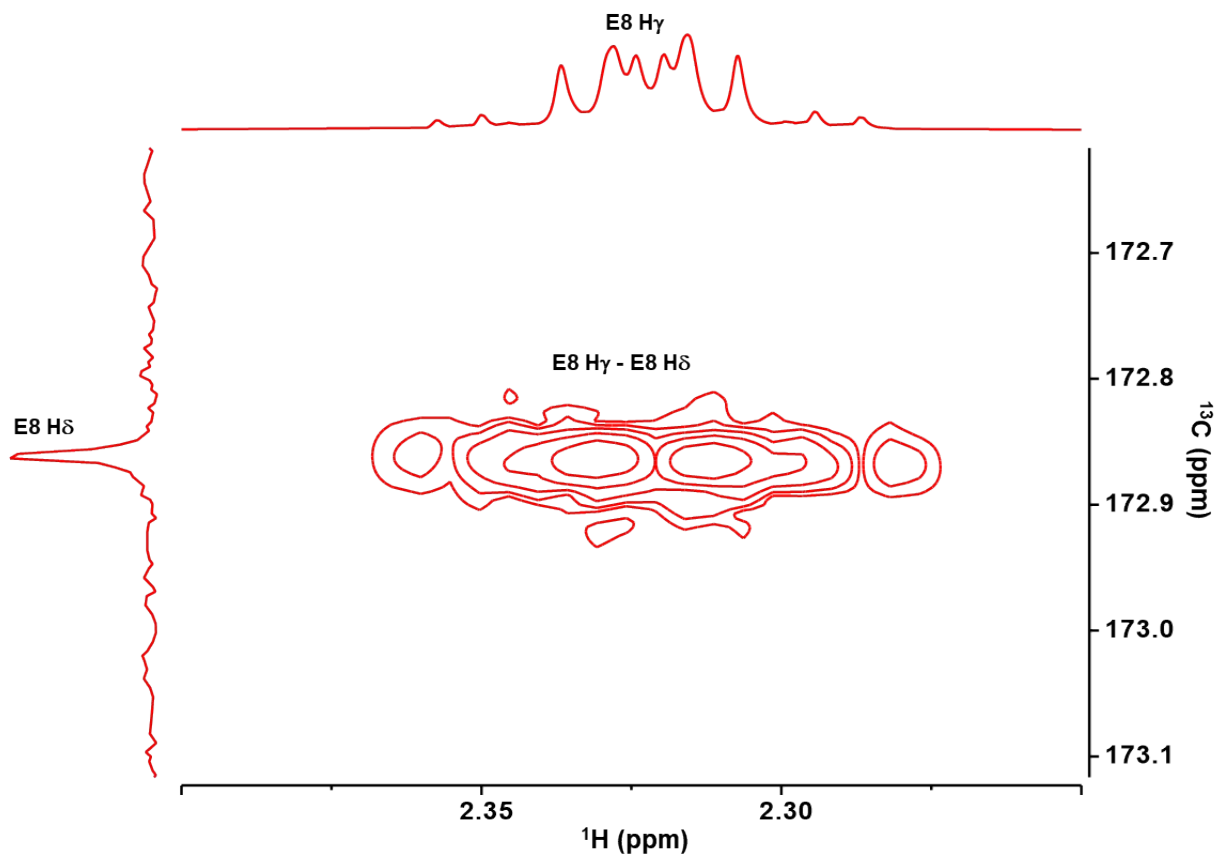

**Figure S24.** selHMBC of  $\alpha$ CT11-4OMe: E8 H $\gamma$  resonance region (2.30 – 2.35 ppm) x E8 C $\delta$  region (172.7 – 173.1 ppm), with the E8 H $\gamma$  (pink)- C $\delta$  (yellow) correlation used to identify the E8 C $\delta$  resonance.

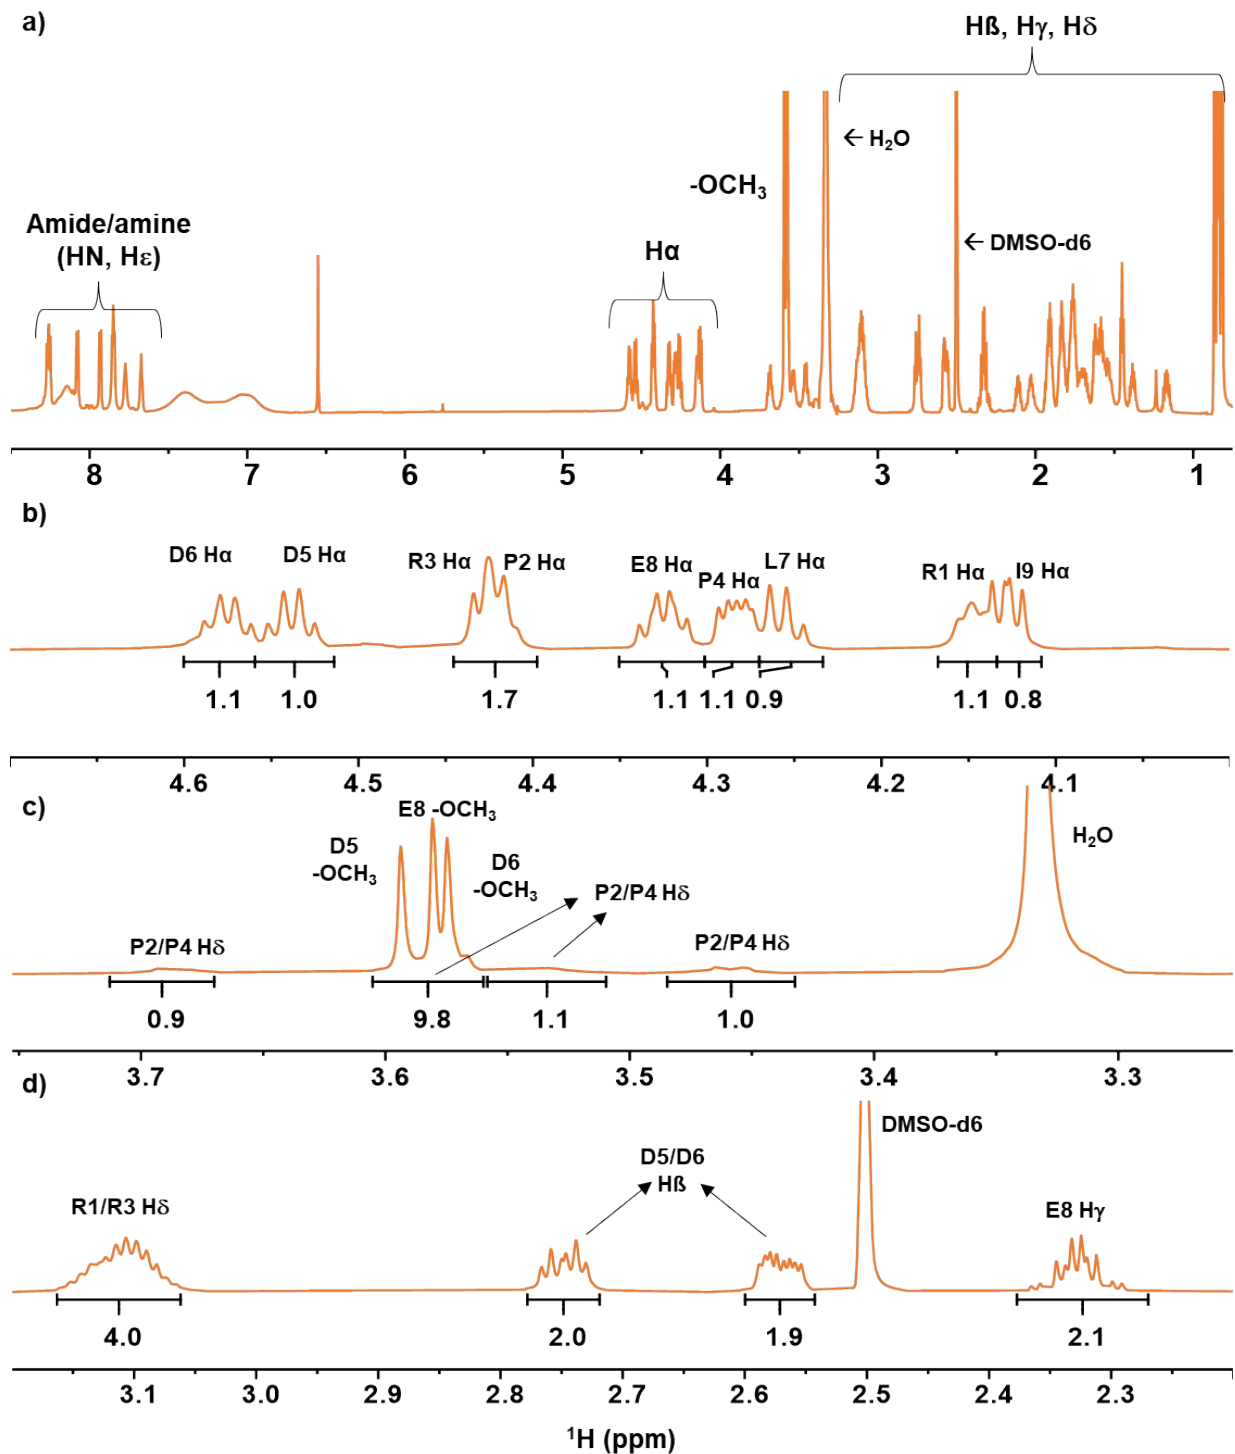

**Figure S25.** Expanded select regions of the  $\alpha$ CT11-3OMe(D5,D6,E8)  $^1\text{H}$  NMR spectrum. Besides **a)** the full spectrum (0.75 – 8.5 ppm), the **b)** H $\alpha$  region (4.0 – 4.7 ppm), **c)** methyl ester H and proline H $\delta$  region (3.3 – 3.8 ppm), and **d)** the R1/R3 H $\delta$ , D5/D6 H $\beta$ , and E8 H $\gamma$  region H (2.2 – 3.2 ppm) regions are expanded with the corresponding resonances labeled.

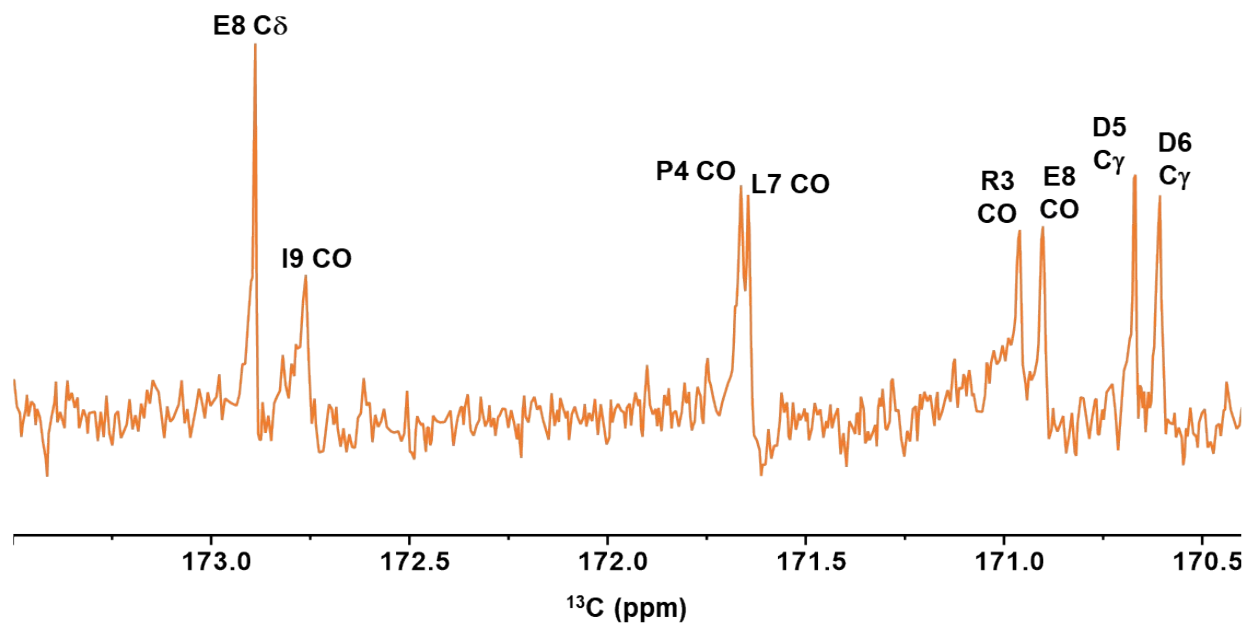

**Figure S26.** Carbonyl carbon region of the  $\alpha\text{CT11-3OMe(D5,D6,E8)}$   $^{13}\text{C}$  NMR spectrum (170.4 – 173.5 ppm).

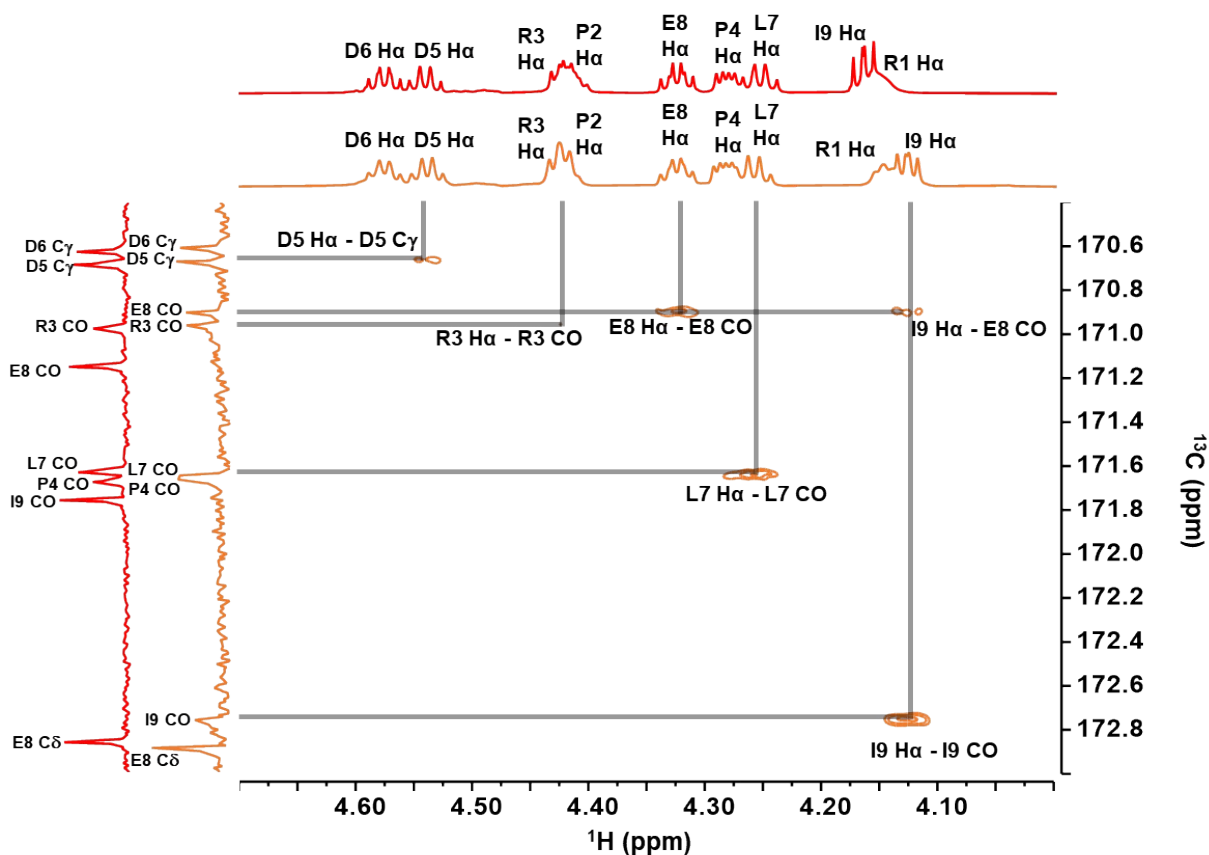

**Figure S27.** selHMBC of  $\alpha\text{CT11-3OMe(D5,D6,E8)}$ : Ha region (4.0 – 4.7 ppm) x carbonyl C region (170.4 – 173.2 ppm). Ha – C correlations and the D5 Ha - C $\gamma$  correlation were used to assign  $\alpha\text{CT11-3OMe(D5,D6,E8)}$  carbonyl C resonances. Corresponding  $\alpha\text{CT11-4OMe(D5,D6,E8)}$   $^1\text{H}$  and  $^{13}\text{C}$  spectra (red) are stacked above the corresponding -3OMe(D5,D6,E8) spectra (orange) as a comparison, specifically highlighting the upfield shift in the I9 Ha resonance and the upfield/downfield shifts in the E8/I9 carbonyl C resonances observed in the -3OMe(D5,D6,E8) spectra relative to the 4OMe spectra.

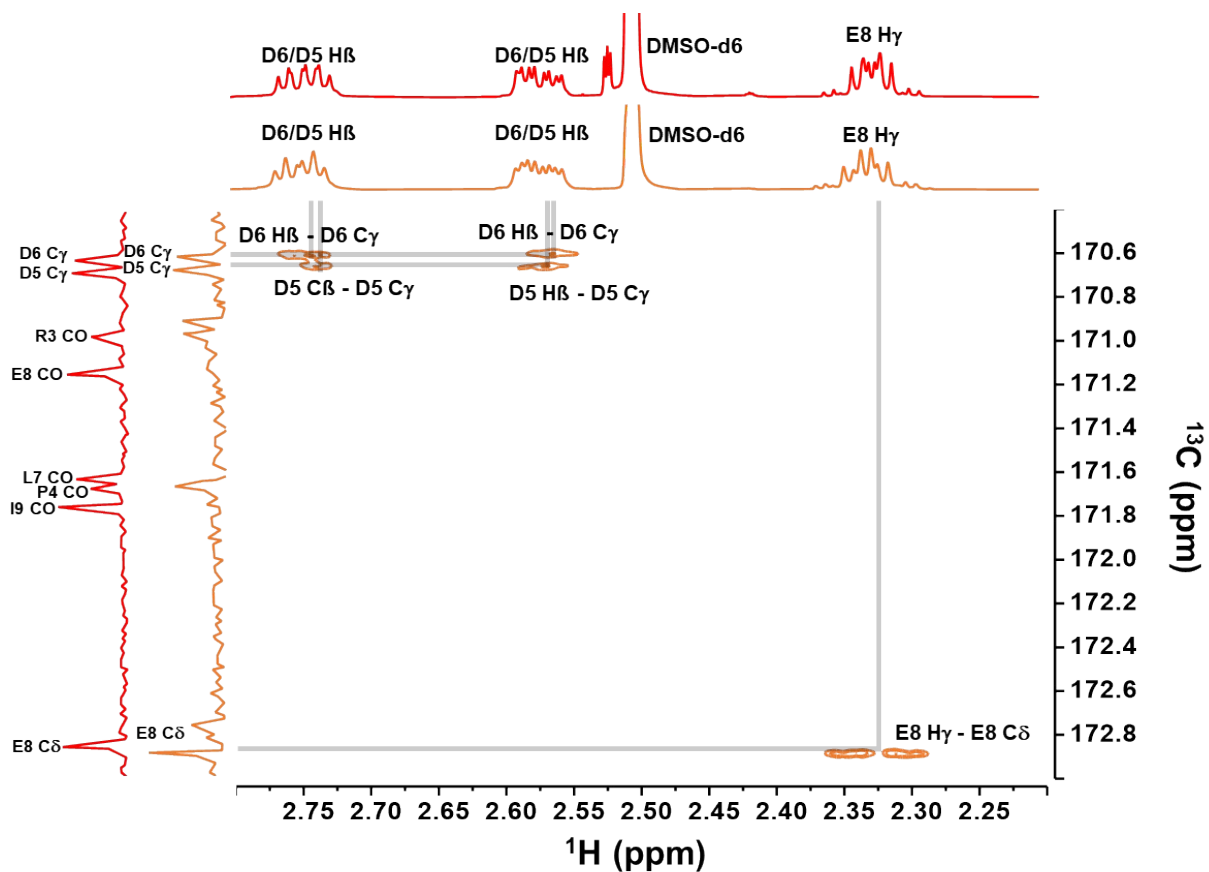

**Figure S28.** selHMBC of  $\alpha\text{CT11-3OMe(D5,D6,E8)}$ : D5/D6 H $\beta$  and E8 H $\gamma$  resonance region (2.2 – 2.8 ppm) x carbonyl C region (170.4 – 173.2 ppm). The D5/D6 H $\beta$  - C $\gamma$  and E8 H $\gamma$  - C $\delta$  correlations were used to assign the D5/D6 C $\gamma$  and E8 C $\delta$  resonances, respectively. Corresponding  $\alpha\text{CT11-4OMe}$   $^1\text{H}$  and  $^{13}\text{C}$  spectra (red) are stacked above the corresponding  $\alpha\text{CT11-3OMe(D5,D6,E8)}$  spectra (orange), where shifts in the E8 C and its correlation with the E8 H $\gamma$  were observed.

### Section S3: Hydrolysis of installed $\alpha$ CT11 methyl esters.

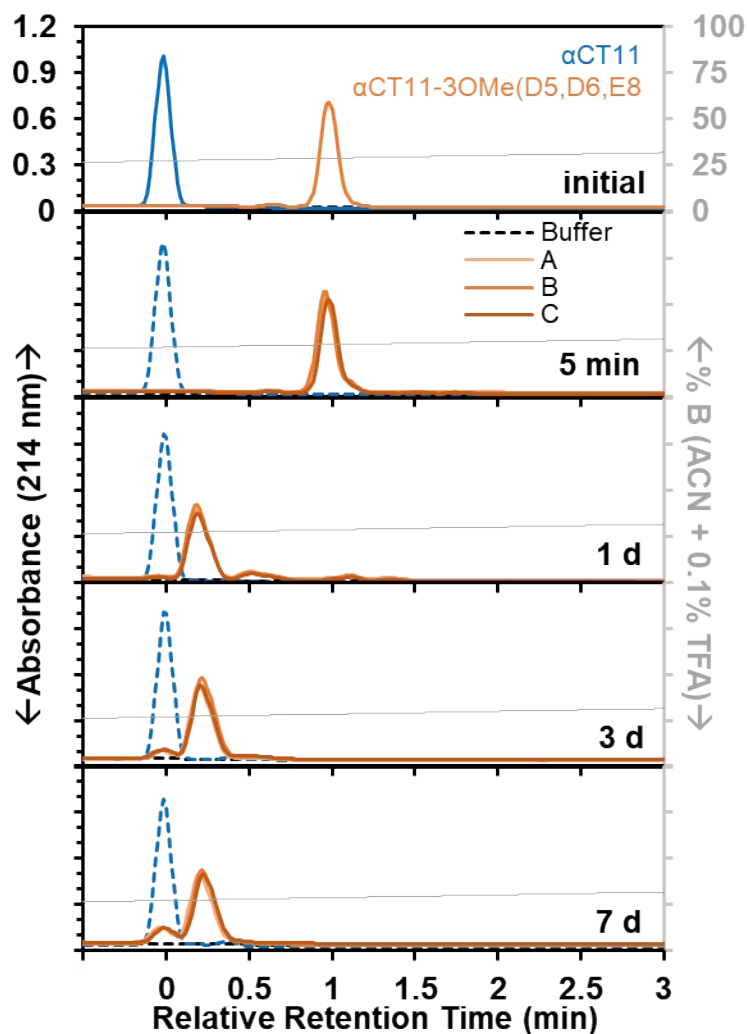

**Figure S29.** Hydrolysis of  $\alpha$ CT11-3OMe(D5,D6,E8) in 1X PBS (pH 7.4). RP-HPLC chromatograms of  $\alpha$ CT11-3OMe(D5,D6,E8) (orange solid lines) are shown compared to unmodified  $\alpha$ CT11 (blue dashed lines) standards run at each timepoint. Standards were stored in 5 % ACN in which no hydrolysis was expected to occur. Significant hydrolysis in PBS was observed only in the first 24 h, but with little subsequent hydrolysis or activation occurring over the remainder of the 14-d experiment. This experiment was repeated in triplicate, with each replicate plotted as a solid line with varying shades of orange (A, B, C). Retention time for each esterified sample was reported relative to that of  $\alpha$ CT11, which was set to a retention time of 0. Mobile phase composition (% ACN + 0.1% TFA, gray) was plotted against the retention time in each RP-HPLC chromatogram.



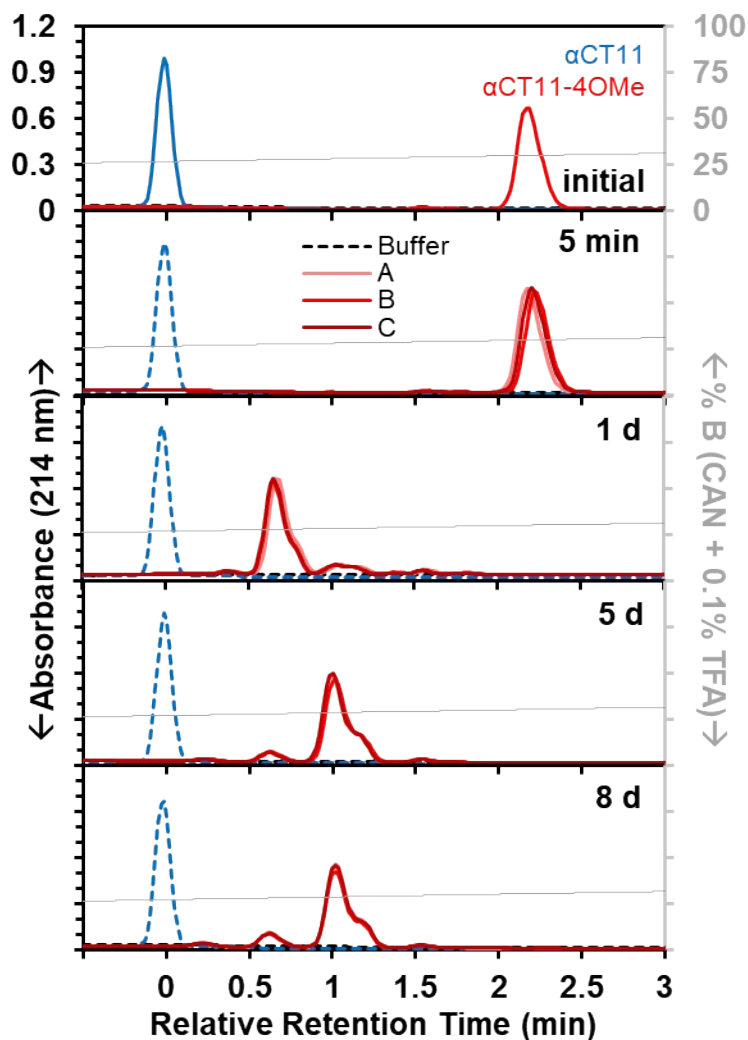

**Figure S30.** Hydrolysis of  $\alpha$ CT11-4OMe in 1X PBS (pH 7.4). RP-HPLC chromatograms of  $\alpha$ CT11-4OMe (red solid lines) are shown compared to unmodified  $\alpha$ CT11 (blue dashed lines) standards run at each timepoint. Standards were stored in 5 % ACN in which no hydrolysis was expected to occur. Significant hydrolysis in PBS was observed only in the first 24 h, but with little subsequent hydrolysis or activation occurring over the remainder of the 8-d experiment. This experiment was repeated in triplicate, with each replicate plotted as a solid line with varying shades of red (A, B, C). Retention time for each esterified sample was reported relative to that of  $\alpha$ CT11, which was set to a retention time of 0. Mobile phase composition (% ACN + 0.1% TFA, gray) was plotted against the retention time in each RP-HPLC chromatogram.

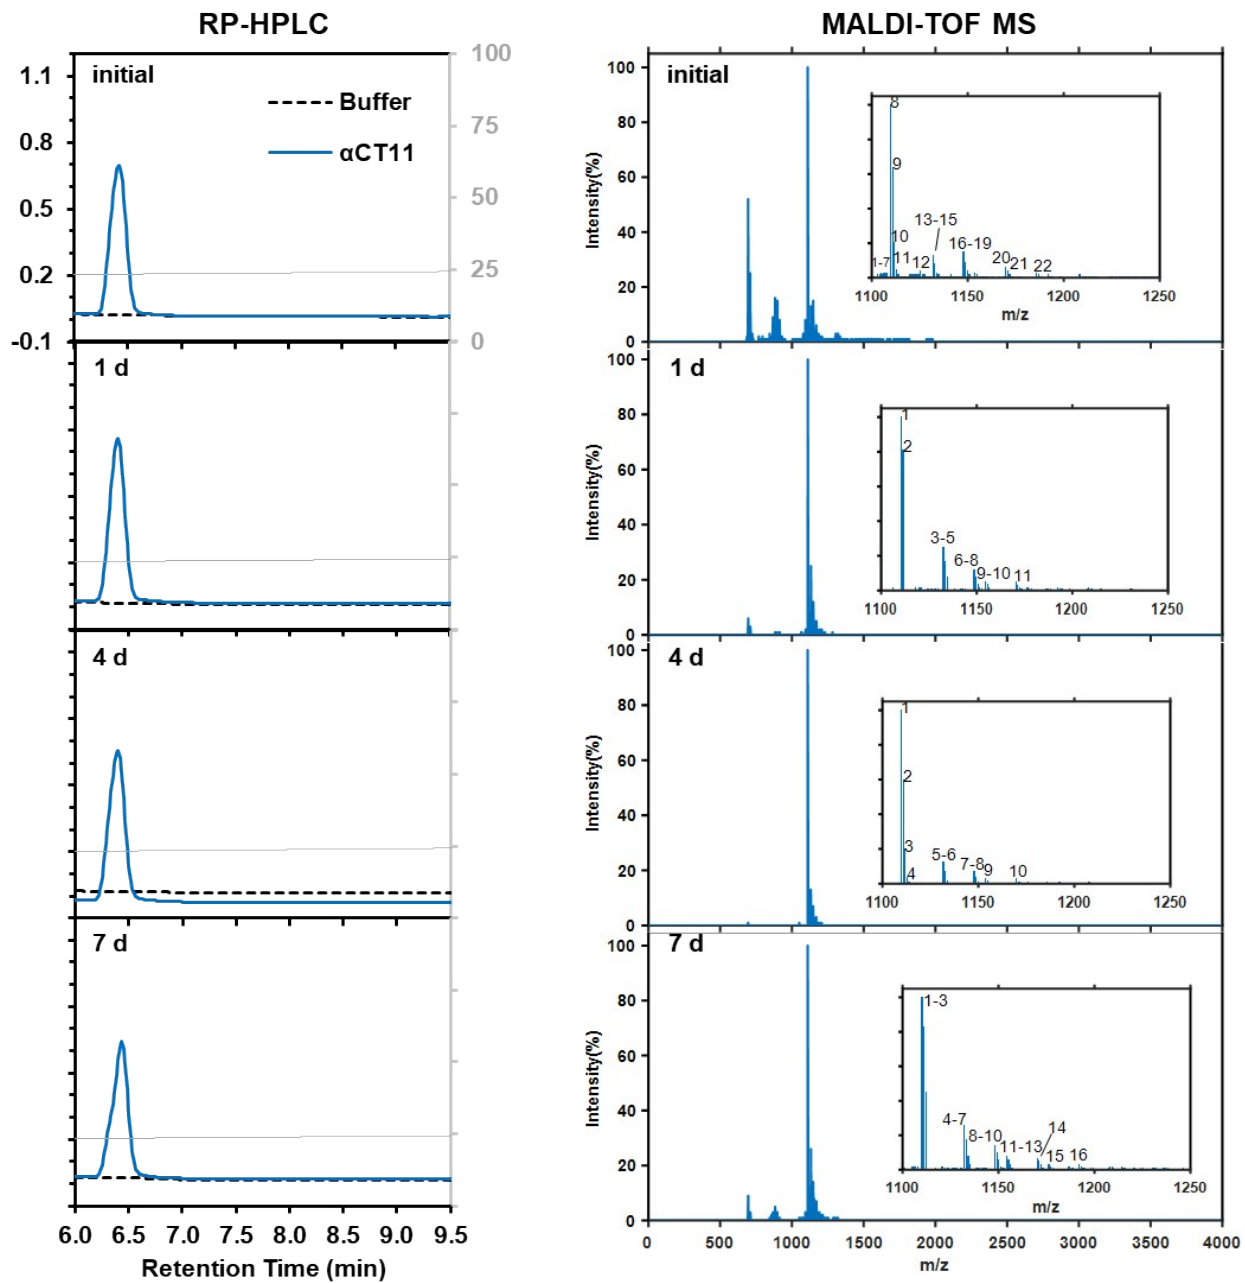

**Figure S31.** RP-HPLC chromatograms and MALDI-TOF spectra of  $\alpha$ CT11 in 1X PBS (pH 7.4) over 1 week. No changes were seen in either the chromatograms or MALDI-TOF mass spec over 7 d. Mobile phase composition (% ACN + 0.1% TFA, gray) was plotted against the retention time in each RP-HPLC chromatogram. MALDI-TOF measurements were obtained through co-crystallization in a CHCA matrix. Data between 1100 and 1250 m/z are shown inset of each plot, with each peak is numerically labeled. Labels are defined in **Table S5**.

**Table S5.** Molecular weights of peaks observed in MALDI-TOF MS data measuring the incubation of  $\alpha$ CT11 in 1X PBS, as shown in Figure S31.

| Time    | label | Mass (Da) | Intensity (%) | Species                                    |
|---------|-------|-----------|---------------|--------------------------------------------|
| initial | 1     | 1104.742  | 3             | ?                                          |
|         | 2     | 1104.897  | 3             | ?                                          |
|         | 3     | 1106.055  | 3             | ?                                          |
|         | 4     | 1106.595  | 3             | ?                                          |
|         | 5     | 1107.136  | 3             | ?                                          |
|         | 6     | 1107.6    | 3             | ?                                          |
|         | 7     | 1107.909  | 3             | ?                                          |
|         | 8     | 1109.919  | 100           | [ $\alpha$ CT11 + H] <sup>+</sup>          |
|         | 9     | 1110.925  | 64            |                                            |
|         | 10    | 1111.931  | 21            |                                            |
|         | 11    | 1113.016  | 5             | ?                                          |
|         | 12    | 1125.367  | 4             | ?                                          |
|         | 13    | 1131.919  | 13            | [ $\alpha$ CT11 + Na] <sup>+</sup>         |
|         | 14    | 1132.935  | 8             |                                            |
|         | 15    | 1133.951  | 3             |                                            |
|         | 16    | 1147.833  | 15            | [ $\alpha$ CT11 + K] <sup>+</sup>          |
|         | 17    | 1148.856  | 9             |                                            |
|         | 18    | 1149.879  | 4             |                                            |
|         | 19    | 1153.898  | 3             | [ $\alpha$ CT11 + 2Na - H] <sup>+</sup>    |
|         | 20    | 1169.806  | 6             | [ $\alpha$ CT11 + K + Na - H] <sup>+</sup> |
|         | 21    | 1170.839  | 4             | [ $\alpha$ CT11 + K + Na - H] <sup>+</sup> |
|         | 22    | 1185.743  | 3             | ?                                          |

|     |    |          |     |                                              |
|-----|----|----------|-----|----------------------------------------------|
|     | 23 | 1321.423 | 3   | ?                                            |
| 1 d | 1  | 1110.4   | 100 | [ $\alpha$ CT11 + H] <sup>+</sup>            |
|     | 2  | 1111.5   | 81  |                                              |
|     | 3  | 1132.6   | 25  | [ $\alpha$ CT11 + Na] <sup>+</sup>           |
|     | 4  | 1133.6   | 17  |                                              |
|     | 5  | 1134.6   | 8   |                                              |
|     | 6  | 1148.6   | 12  | [ $\alpha$ CT11 + K] <sup>+</sup>            |
|     | 7  | 1149.6   | 8   |                                              |
|     | 8  | 1150.6   | 4   |                                              |
|     | 9  | 1154.7   | 5   | [ $\alpha$ CT11 + 2Na - H] <sup>+</sup>      |
|     | 10 | 1155.6   | 4   |                                              |
|     | 11 | 1171.5   | 3   | [ $\alpha$ CT11 + K + Na - 2H] <sup>+</sup>  |
| 4 d | 1  | 1109.8   | 100 | [ $\alpha$ CT11 + H] <sup>+</sup>            |
|     | 2  | 1110.9   | 60  |                                              |
|     | 3  | 1111.9   | 20  |                                              |
|     | 4  | 1112.9   | 4   |                                              |
|     | 5  | 1131.8   | 13  | [ $\alpha$ CT11 + Na] <sup>+</sup>           |
|     | 6  | 1132.9   | 7   | [ $\alpha$ CT11 + K] <sup>+</sup>            |
|     | 7  | 1147.8   | 7   |                                              |
|     | 8  | 1148.9   | 4   |                                              |
|     | 9  | 1153.8   | 3   | [ $\alpha$ CT11 + 2Na - H] <sup>+</sup>      |
|     | 10 | 1169.8   | 3   | [ $\alpha$ CT11 + K + 2Na - 2H] <sup>+</sup> |
| 7 d | 1  | 1110.1   | 100 | [ $\alpha$ CT11 + H] <sup>+</sup>            |
|     | 2  | 1111.2   | 83  |                                              |
|     | 3  | 1112.2   | 45  |                                              |

|  |    |          |    |                                              |
|--|----|----------|----|----------------------------------------------|
|  | 4  | 1132.3   | 26 | [ $\alpha$ CT11 + Na] <sup>+</sup>           |
|  | 5  | 1133.3   | 18 |                                              |
|  | 6  | 1134.2   | 8  |                                              |
|  | 7  | 1135.2   | 3  |                                              |
|  | 8  | 1148.2   | 14 | [ $\alpha$ CT11 + K] <sup>+</sup>            |
|  | 9  | 1149.2   | 10 |                                              |
|  | 10 | 1150.2   | 6  |                                              |
|  | 11 | 1154.2   | 8  | [ $\alpha$ CT11 + 2Na - H] <sup>+</sup>      |
|  | 12 | 1155.3   | 6  |                                              |
|  | 13 | 1156.218 | 3  |                                              |
|  | 14 | 1170.238 | 7  | [ $\alpha$ CT11 + K + Na - H] <sup>+</sup>   |
|  | 15 | 1176.204 | 3  | [ $\alpha$ CT11 + 3Na - 2H] <sup>+</sup>     |
|  | 16 | 1192.188 | 3  | [ $\alpha$ CT11 + K + 2Na - 2H] <sup>+</sup> |

**Table S6.** Percent activation of  $\alpha$ CT11-3OMe(D5,D6,E8) and -4OMe in 1X PBS (pH 7.4) and 100 mM carbonate buffer (pH 10.0) over 8 d.

| Time (d) | 3OMe(D5,D6,E8)  |       |                                 |       | 4OMe            |       |                                 |       |
|----------|-----------------|-------|---------------------------------|-------|-----------------|-------|---------------------------------|-------|
|          | 1X PBS (pH 7.4) |       | 100 mM carbonate buffer (pH 10) |       | 1X PBS (pH 7.4) |       | 100 mM carbonate buffer (pH 10) |       |
|          | Average         | StDev | Average                         | StDev | Average         | StDev | Average                         | StDev |
| 0.00     | 0.0             | 0.0   | 0.22                            | 0.11  | 0.00            | 0.00  | 0.62                            | 0.08  |
| 0.25     |                 |       | 54.65                           | 2.42  |                 |       | 15.20                           | 0.36  |
| 0.50     |                 |       | 66.94                           | 0.87  |                 |       | 35.81                           | 0.32  |
| 1.00     | 3.4             | 1.0   | 88.14                           | 0.46  | 0.00            | 0.00  | 62.33                           | 1.09  |
| 1.50     |                 |       | 96.15                           | 0.74  |                 |       | 76.36                           | 0.55  |
| 2.00     |                 |       | 98.33                           | 0.27  |                 |       | 84.41                           | 0.13  |
| 3.00     | 5.8             | 1.9   | 100.32                          | 0.08  |                 |       | 93.82                           | 0.18  |
| 5.00     |                 |       | 99.99                           | 0.15  | 0.00            | 0.00  | 98.50                           | 0.28  |
| 7.00     | 10.5            | 2.3   |                                 |       |                 |       |                                 |       |
| 8.00     |                 |       |                                 |       | 1.13            | 0.30  |                                 |       |

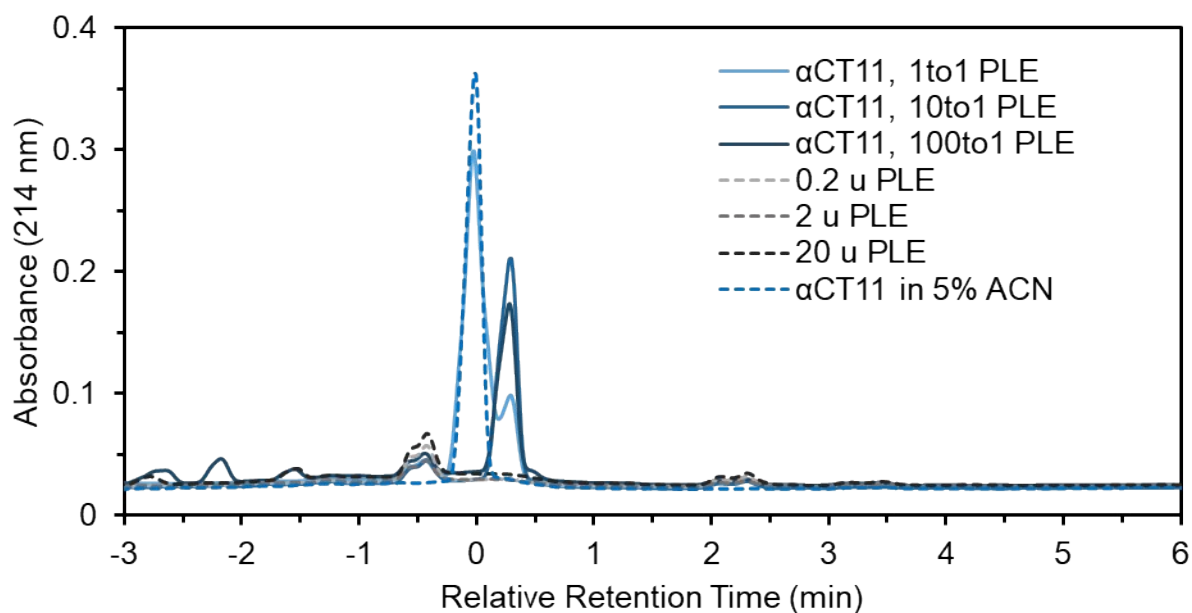

**Figure S32.** PLE-catalyzed hydrolysis of  $\alpha$ CT11. Hydrolysis was performed at a 1:1 (light blue), 10:1 (blue), and 100:1 (navy blue) ratios of PLE enzyme units: $\mu$ mol  $\alpha$ CT11. PLE controls for each condition (gray, dashed lines) and an  $\alpha$ CT11 only control (blue dashed line) is also pictured. The appearance of a second peak in  $\alpha$ CT11 + PLE samples and the disappearance of  $\alpha$ CT11 were observed with increasing PLE concentration. Retention time of each sample is reported relative to an  $\alpha$ CT11 control, which was set to 0.

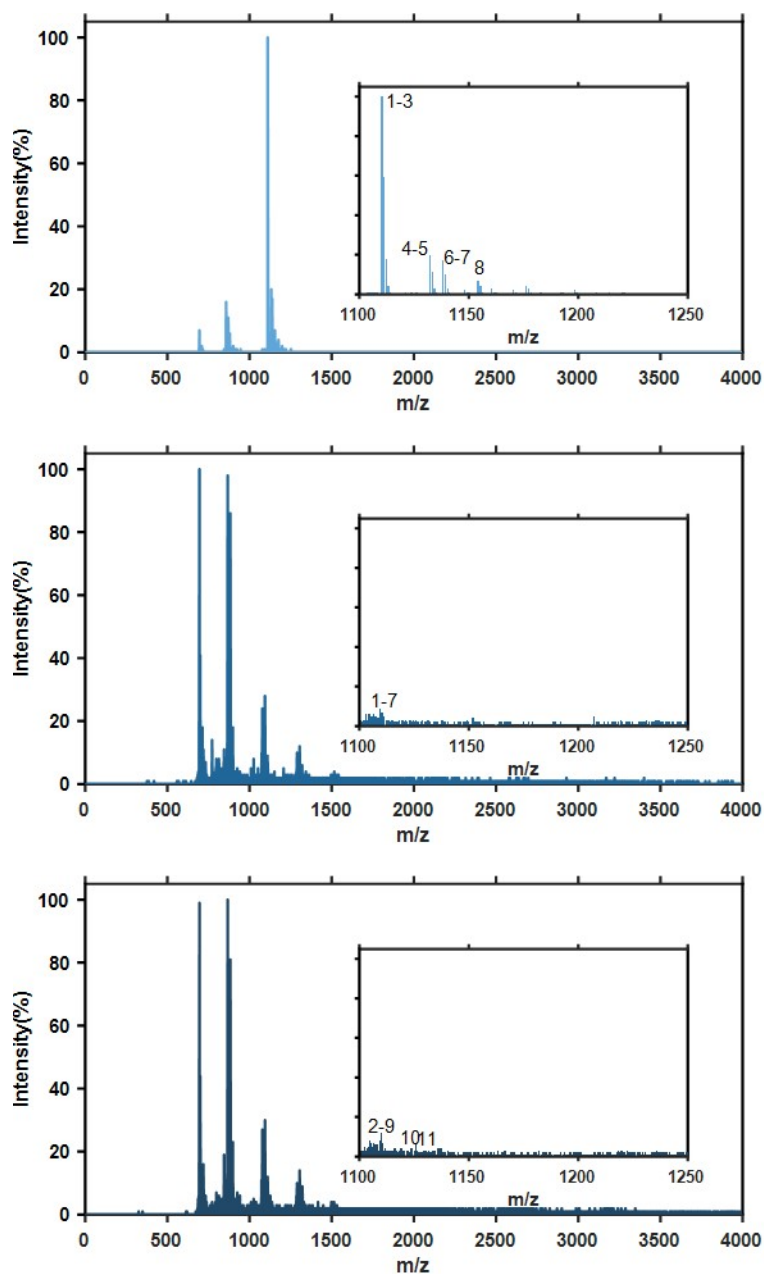

**Figure S33.** MALDI-TOF MS results of PLE-catalyzed hydrolysis of  $\alpha$ CT11, depicted in Figure S32. Hydrolysis was performed at a 1:1 (light blue), 10:1 (blue), and 100:1 (navy blue) ratios of PLE enzyme units: $\mu$ mol  $\alpha$ CT11. Results between 1100-1250 m/z, where  $\alpha$ CT11 is expected to appear in MALDI-TOF MS, is inset.  $\alpha$ CT11-related peaks disappeared with increasing PLE concentration. Peak labels are defined in Table S7.

**Table S7.** MALDI-TOF MS results of PLE-catalyzed hydrolysis of  $\alpha$ CT11.

| PLE: $\alpha$ CT11<br>ratio (enzyme<br>units: $\mu$ mol<br>peptide) | label | Mass (Da) | Intensity (%) | Species                                         |
|---------------------------------------------------------------------|-------|-----------|---------------|-------------------------------------------------|
| 1:1                                                                 | 1     | 1110.28   | 100           | $[\alpha\text{CT11} + \text{H}]^+$              |
|                                                                     | 2     | 1111.28   | 59            | $[\alpha\text{CT11} + \text{H}]^+$              |
|                                                                     | 3     | 1112.37   | 18            | $[\alpha\text{CT11} + \text{H}]^+$              |
|                                                                     | 4     | 1132.36   | 20            | $[\alpha\text{CT11} + \text{Na}]^+$             |
|                                                                     | 5     | 1133.38   | 11            | $[\alpha\text{CT11} + \text{Na}]^+$             |
|                                                                     | 6     | 1138.31   | 17            | $[\text{2OMe} + \text{H}]^+$                    |
|                                                                     | 7     | 1139.32   | 10            | $[\text{2OMe} + \text{H}]^+$                    |
|                                                                     | 8     | 1154.34   | 7             | $[\alpha\text{CT11} + 2\text{Na} - \text{H}]^+$ |
| 10:1                                                                | 1     | 1103.25   | 6             | N/A                                             |
|                                                                     | 2     | 1104.48   | 6             | N/A                                             |
|                                                                     | 3     | 1106.64   | 6             | N/A                                             |
|                                                                     | 4     | 1107.42   | 5             | N/A                                             |
|                                                                     | 5     | 1109.5    | 9             | N/A                                             |
|                                                                     | 6     | 1110.43   | 7             | N/A                                             |
|                                                                     | 7     | 1112.6    | 3             | N/A                                             |
| 100:1                                                               | 1     | 1100.86   | 3             | N/A                                             |
|                                                                     | 2     | 1104.64   | 8             | N/A                                             |
|                                                                     | 3     | 1105.25   | 7             | N/A                                             |
|                                                                     | 4     | 1106.64   | 7             | N/A                                             |
|                                                                     | 5     | 1106.95   | 6             | N/A                                             |
|                                                                     | 6     | 1107.96   | 6             | N/A                                             |
|                                                                     | 7     | 1109.5    | 8             | N/A                                             |
|                                                                     | 8     | 1109.97   | 12            | N/A                                             |
|                                                                     | 9     | 1110.82   | 7             | N/A                                             |
|                                                                     | 10    | 1118.65   | 3             | N/A                                             |
|                                                                     | 11    | 1125.81   | 6             | N/A                                             |

\*N/A refers to a sample that cannot be reliably attributed to either matrix or  $\alpha$ CT11.



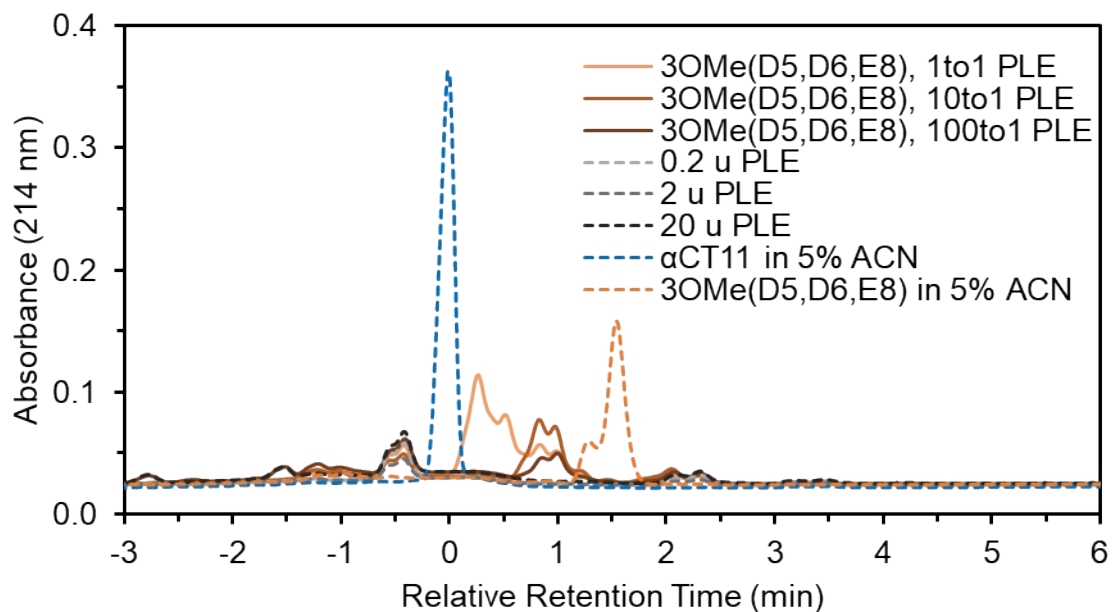

**Figure S34.** RP-HPLC chromatogram of PLE-catalyzed hydrolysis of  $\alpha$ CT11-3OMe(D5,D6,E8). Hydrolysis was performed at a 1:1 (light orange), 10:1 (dark orange), and 100:1 (brown) ratios of PLE enzyme units: $\mu$ mol  $\alpha$ CT11. PLE controls for each condition (gray, dashed lines) and an  $\alpha$ CT11-3OMe(D5,D6,E8) control (orange dashed line) and  $\alpha$ CT11 control (blue dashed line) are also pictured. The appearance of an unaccounted-for peak in  $\alpha$ CT11-3OMe(D5,D6,E8) + PLE samples and the disappearance of  $\alpha$ CT11 were observed with increasing PLE concentration. Retention time of each sample is reported relative to an  $\alpha$ CT11 control, which was set to 0.

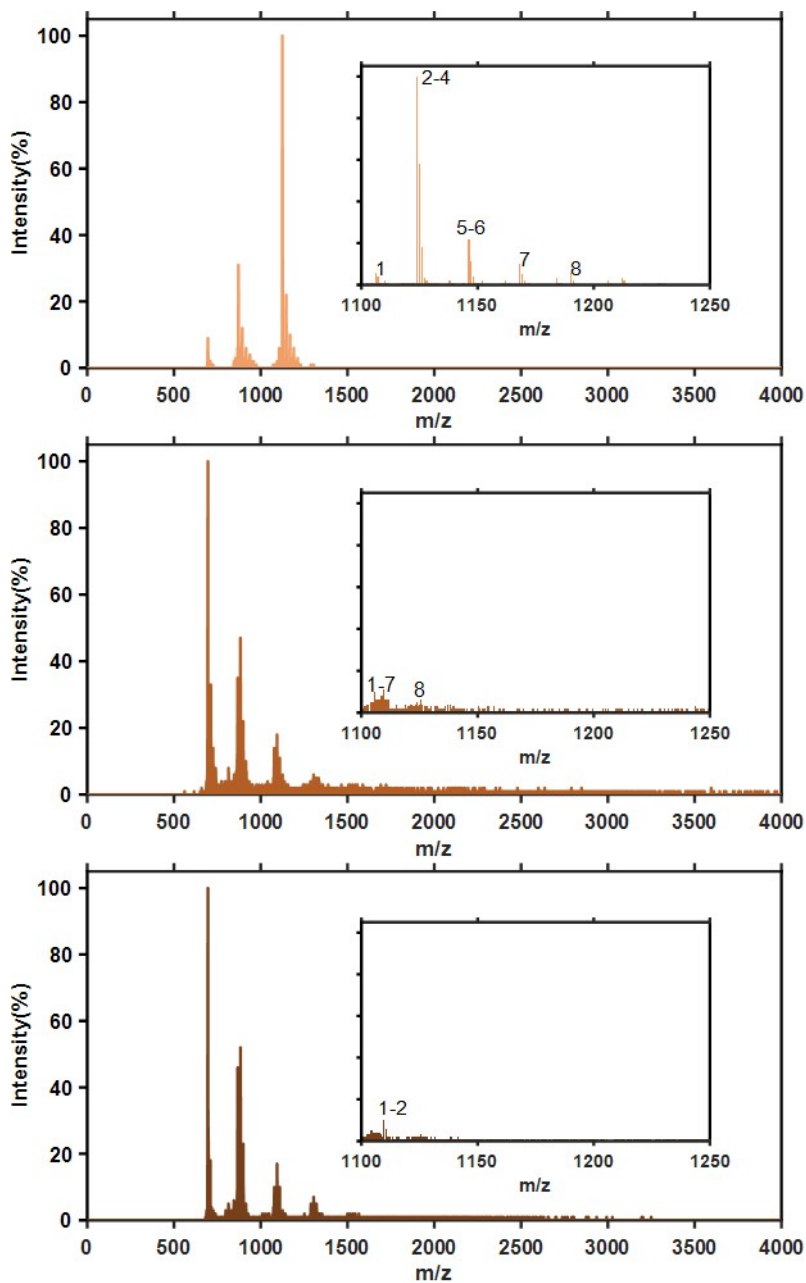

**Figure S35.** MALDI-TOF MS results of PLE-catalyzed hydrolysis of  $\alpha$ CT11-3OMe(D5,D6,E8), depicted in Figure S34. Hydrolysis was performed at a 1:1 (light orange), 10:1 (dark orange), and 100:1 (brown) ratios of PLE enzyme units: $\mu$ mol  $\alpha$ CT11. Results between 1100-1250 m/z, where  $\alpha$ CT11 is expected to appear in MALDI-TOF MS, is inset.  $\alpha$ CT11-related peaks disappeared with increasing PLE concentration. Peak labels are defined in **Table S8**.

**Table S8.** MALDI-TOF MS results of PLE-catalyzed hydrolysis of  $\alpha$ CT11-3OMe(D5,D6,E8).

| PLE:αCT11 ratio<br>(enzyme units:<br>μmol peptide) | label | Mass (Da) | Intensity (%) | Species                           |
|----------------------------------------------------|-------|-----------|---------------|-----------------------------------|
| 1:1                                                | 1     | 1106.103  | 6             | [1OMe + 1 imide + H] <sup>+</sup> |
|                                                    | 2     | 1124.092  | 100           | [1OMe + H] <sup>+</sup>           |
|                                                    | 3     | 1125.104  | 58            | [1OMe + H] <sup>+</sup>           |
|                                                    | 4     | 1126.117  | 18            | [1OMe + H] <sup>+</sup>           |
|                                                    | 5     | 1146.152  | 22            | [1OMe + Na] <sup>+</sup>          |
|                                                    | 6     | 1147.175  | 11            | [1OMe + Na] <sup>+</sup>          |
|                                                    | 7     | 1168.19   | 10            | [1OMe + 2Na - H] <sup>+</sup>     |
|                                                    | 8     | 1190.196  | 6             | [3OMe + K] <sup>+</sup>           |
| 10:1                                               | 1     | 1105.794  | 10            | N/A                               |
|                                                    | 2     | 1106.489  | 6             | [1OMe + 1 imide + H] <sup>+</sup> |
|                                                    | 3     | 1107.648  | 6             | [1OMe + 1 imide + H] <sup>+</sup> |
|                                                    | 4     | 1108.653  | 8             | [1OMe + 1 imide + H] <sup>+</sup> |
|                                                    | 5     | 1109.581  | 11            | PLE                               |
|                                                    | 6     | 1110.509  | 6             | [αCT11 + H] <sup>+</sup>          |
|                                                    | 7     | 1111.593  | 6             | [αCT11 + H] <sup>+</sup>          |
|                                                    | 8     | 1125.493  | 6             | N/A                               |
| 100:1                                              | 1     | 1109.735  | 10            | PLE                               |
|                                                    | 2     | 1110.741  | 6             | PLE                               |

\*N/A refers to a sample that cannot be reliably attributed to either matrix or αCT11.

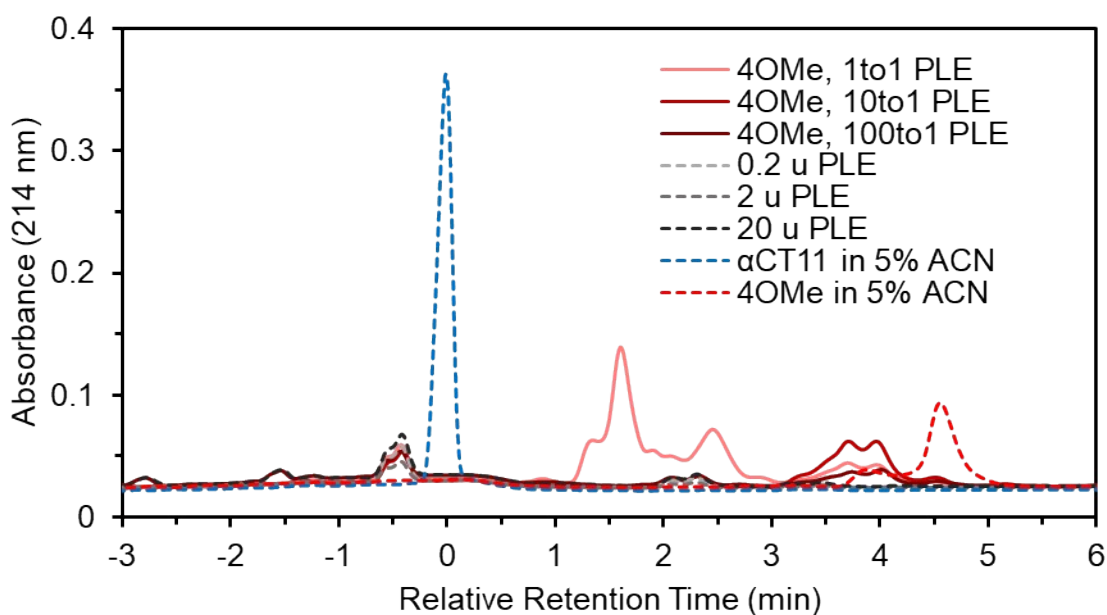

**Figure S36.** RP-HPLC chromatogram of PLE-catalyzed hydrolysis of αCT11-4OMe. Hydrolysis was performed at a 1:1 (pink), 10:1 (red), and 100:1 (dark red) ratios of PLE enzyme units:μmol αCT11. PLE controls for each condition (gray, dashed lines) and an αCT11-4OMe control (red dashed line) and αCT11 control (blue dashed line) are also pictured. The appearance of an unaccounted-for peak in αCT11-4OMe

+ PLE samples were observed with increasing PLE concentration. Retention time of each sample is reported relative to an  $\alpha$ CT11 control, which was set to 0.

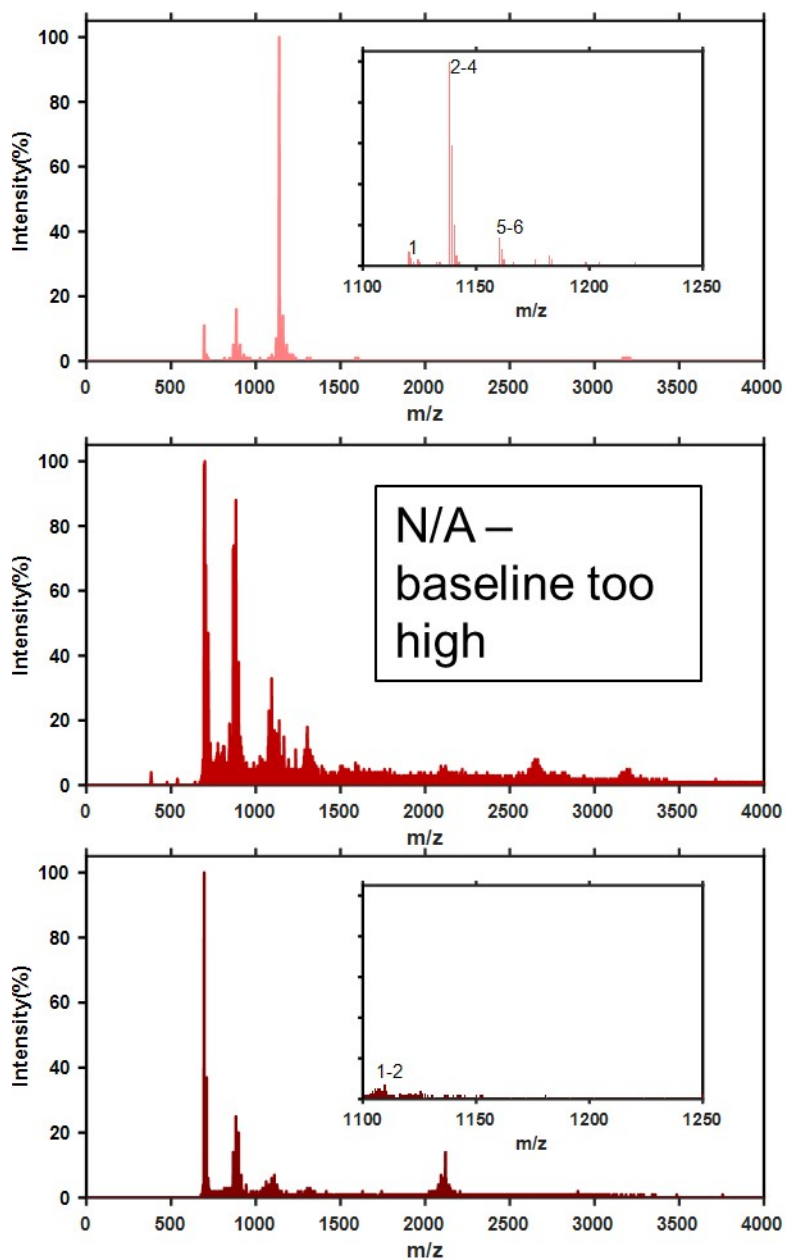

**Figure S37.** MALDI-TOF MS results of PLE-catalyzed hydrolysis of  $\alpha$ CT11-4OMe, depicted in Figure S36. Hydrolysis was performed at a 1:1 (pink), 10:1 (red), and 100:1 (dark red) ratios of PLE enzyme units: $\mu$ mol  $\alpha$ CT11. Results between 1100-1250 m/z, where  $\alpha$ CT11 is expected to appear in MALDI-TOF MS, is inset.  $\alpha$ CT11-related peaks disappeared with increasing PLE concentration. Peak labels are defined in **Table S9**.

**Table S9.** MALDI-TOF MS results of PLE-catalyzed hydrolysis of  $\alpha$ CT11-3OMe(D5,D6,E8).

| PLE:αCT11 ratio<br>(enzyme units:<br>μmol peptide) | label | Mass (Da) | Intensity (%) | Species                           |
|----------------------------------------------------|-------|-----------|---------------|-----------------------------------|
| 1:1                                                | 1     | 1120.358  | 7             | [2OMe + 1 imide + H] <sup>+</sup> |
|                                                    | 2     | 1138.383  | 100           | [2OMe + H] <sup>+</sup>           |
|                                                    | 3     | 1139.402  | 59            | [2OMe + H] <sup>+</sup>           |
|                                                    | 4     | 1140.421  | 20            | [2OMe + H] <sup>+</sup>           |
|                                                    | 5     | 1160.425  | 14            | [2OMe + Na] <sup>+</sup>          |
|                                                    | 6     | 1161.454  | 8             | [2OMe + Na] <sup>+</sup>          |
| 100:1                                              | 1     | 1107.493  | 5             | ?                                 |
|                                                    | 2     | 1109.658  | 7             | PLE                               |

\*N/A refers to a sample that cannot be reliably attributed to either matrix or αCT11.

We varied the PLE concentration between 1:1, 10:1, and 100:1 enzyme units:μmol peptide and stirred the solution at 37 °C over 24 h. At all ratios, we observed the appearance of a new peak in the αCT11 RP-HPLC chromatogram, which eluted later (xxx) than the αCT11 peak, grew with increasing PLE concentration, and were not associated with any esterase peaks (**Figure S32**). Further, while MALDI-TOF MS confirmed the presence of αCT11 in the 1:1 PLE:αCT11 sample, we could identify no αCT11 peaks in the 10:1 and 100:1 MALDI-TOF spectra (**Figure S33, Table S7**). Similar trends were observed for the -3OMe(D5,D6,E8) and -4OMe samples, where the 1:1 PLE:peptide MALDI-TOF spectra revealed species similar to those present in samples incubated in only 1X PBS after 1 d (**Figures S34-S37, Table S8-S9**), but a loss of αCT11-related signal in both RP-HPLC chromatograms and MALDI-TOF MS spectra in both 10:1 and 100:1 PLE:peptide samples.

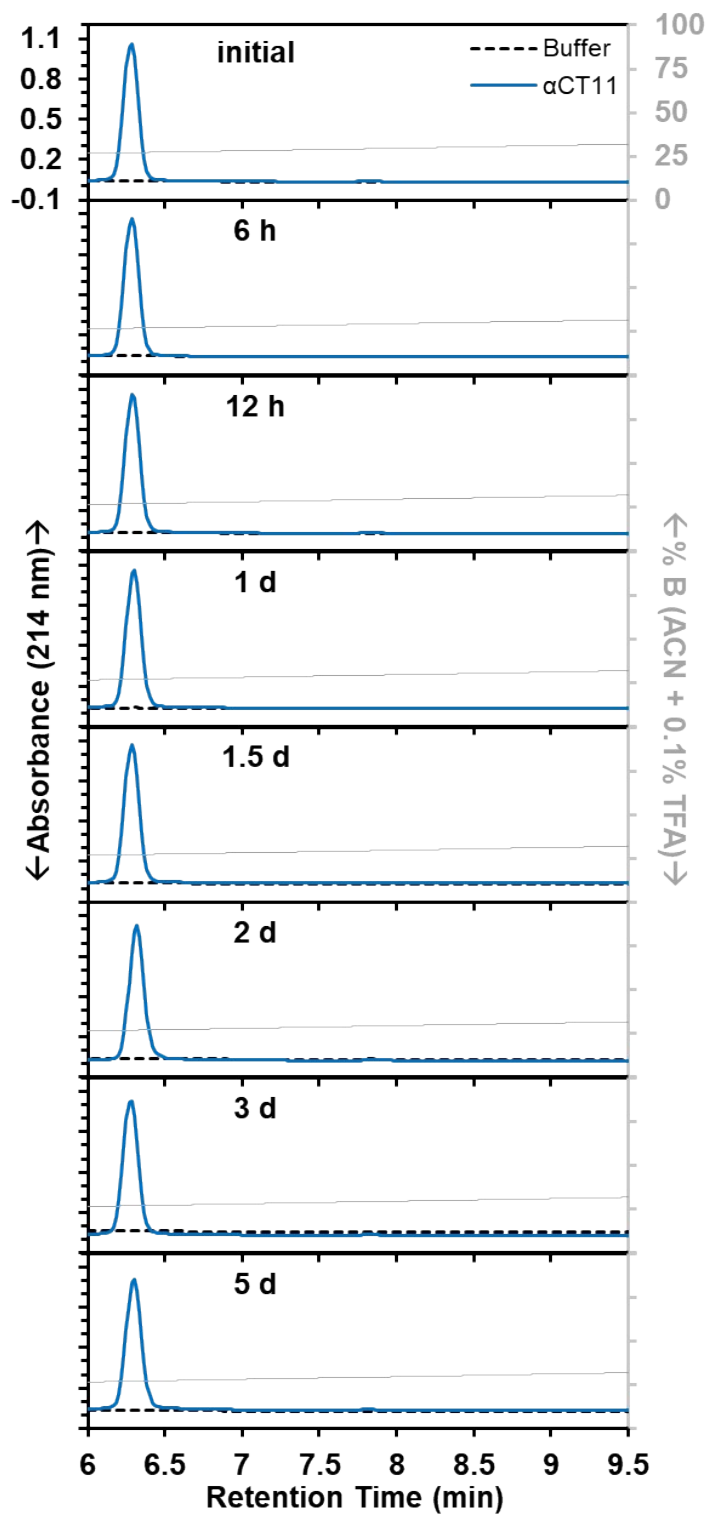

**Figure S38.** RP-HPLC chromatograms αCT11 in 100 mM carbonate buffer (pH 10) over 1 week. No changes were seen in RP-HPLC chromatograms at each tested timepoint, suggesting stability of αCT11 under the basic conditions tested. Mobile phase composition (% ACN + 0.1% TFA, gray) was plotted against the retention time in each RP-HPLC chromatogram.

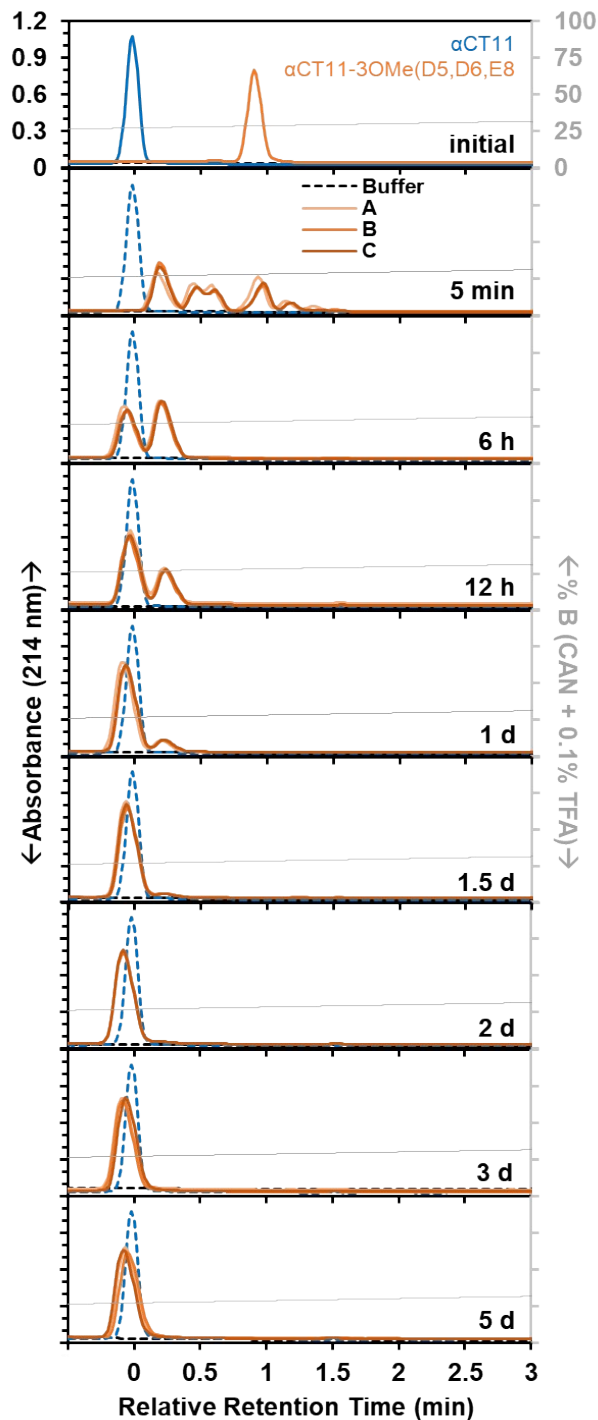

**Figure S39.** Hydrolysis of  $\alpha$ CT11-3OMe(D5,D6,E8) in 100 mM carbonate buffer (pH 10.0). RP-HPLC chromatograms of  $\alpha$ CT11-3OMe(D5,D6,E8) (orange solid lines) are shown compared to unmodified  $\alpha$ CT11 (blue dashed lines) standards run at each timepoint. Standards were stored in 5 % ACN in which no hydrolysis was expected to occur. Full esterified peptide activation was observed after 3 d and was confirmed by LC-MS (**Figure S41**). The experiment was repeated in triplicate, with each replicate plotted as a solid line with varying shades of orange (A, B, C). Retention time for each esterified sample was reported relative to that of  $\alpha$ CT11, which was set to a retention time of 0. Mobile phase composition (% ACN + 0.1% TFA, gray) was plotted against the retention time in each RP-HPLC chromatogram.

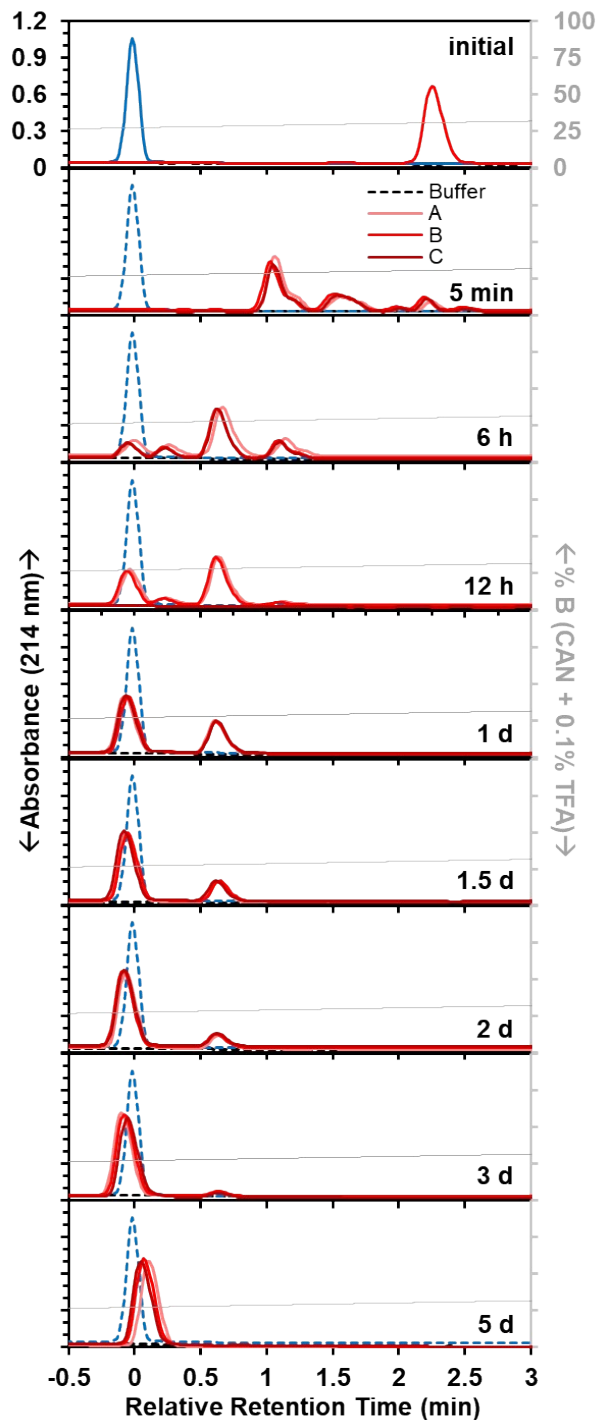

**Figure S40.** Hydrolysis of  $\alpha$ CT11-4OMe in 100 mM carbonate buffer (pH 10.0). RP-HPLC chromatograms of  $\alpha$ CT11-4OMe (red solid lines) are shown compared to unmodified  $\alpha$ CT11 (blue dashed lines) standards run at each timepoint. Standards were stored in 5 % ACN in which no hydrolysis was expected to occur. Full esterified peptide activation was observed after 5 d and was confirmed by LC-MS (**Figure S42**). The experiment was repeated in triplicate, with each replicate plotted as a solid line with varying shades of red (A, B, C). Retention time for each esterified sample was reported relative to that of  $\alpha$ CT11, which was set to a retention time of 0. Mobile phase composition (% ACN + 0.1% TFA, gray) was plotted against the retention time in each RP-HPLC chromatogram.



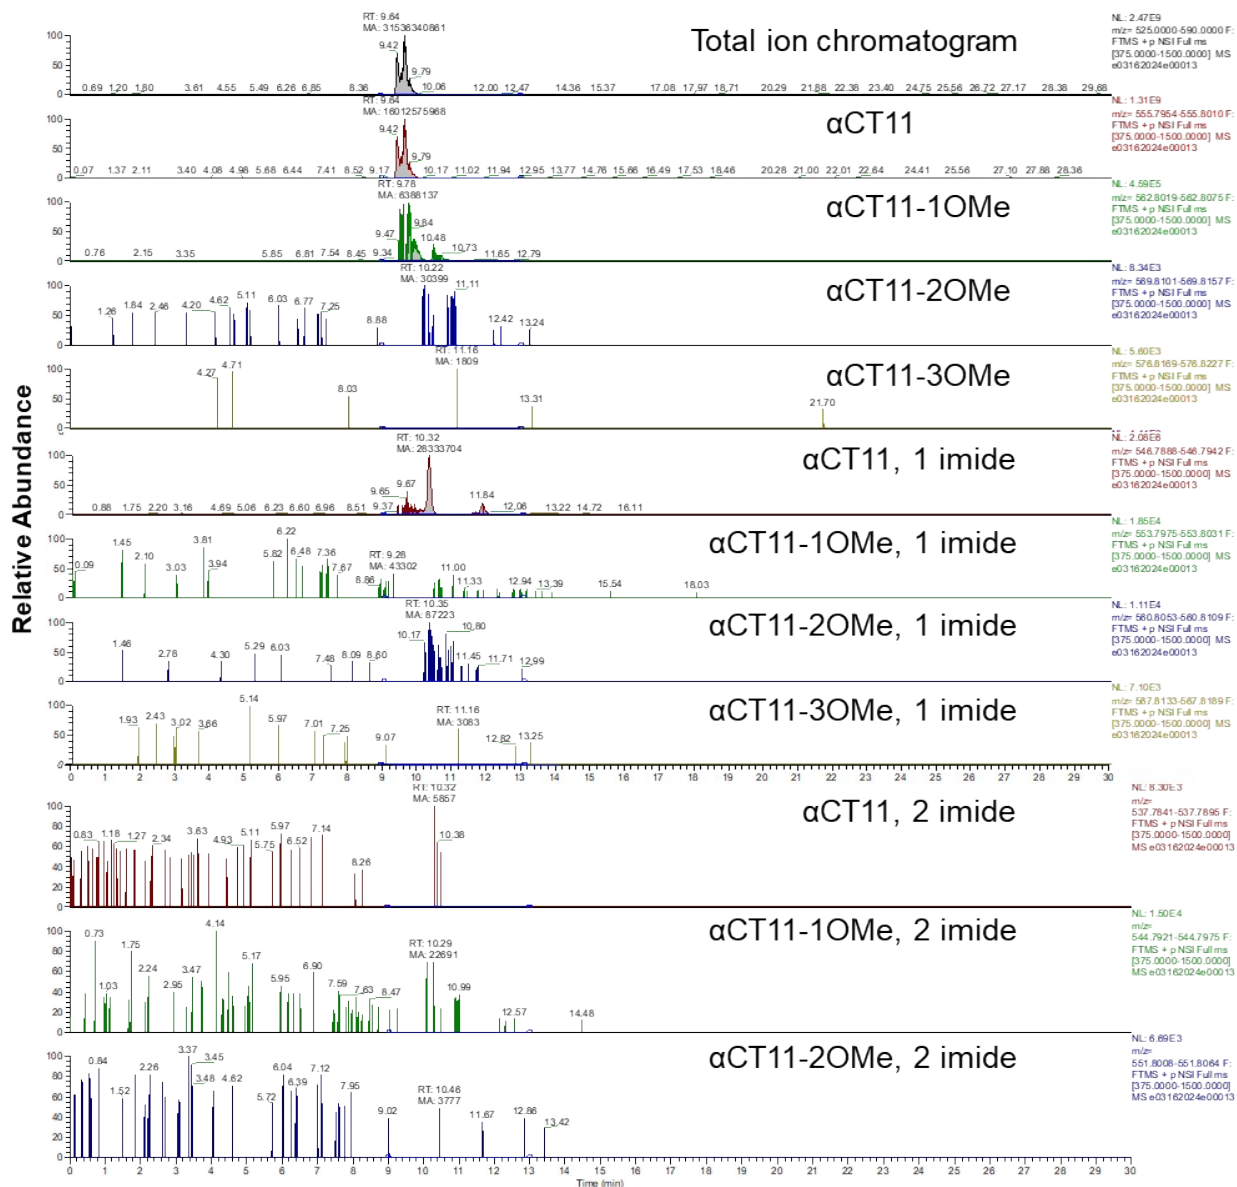

**Figure S41.** LC-MS chromatograms of  $\alpha$ CT11-3OMe(D5,D6,E8) after 3 d of stirring in 100 mM carbonate buffer (pH 10.0) at 37 °C. Total ion chromatogram (top, gray) and selective ion chromatograms for  $\alpha$ CT11 with different numbers of esters and/or imides.



**Table S11.** % Abundance and retention times (RT, min) of  $\alpha$ CT11-based formulations produced by the hydrolysis of  $\alpha$ CT11-4OMe in 100 mM carbonate buffer (pH 10) after 5 d, quantified by LC-MS.

|          |           | Ester #     |          |             |          |             |          |             |          | Total       |          |             |
|----------|-----------|-------------|----------|-------------|----------|-------------|----------|-------------|----------|-------------|----------|-------------|
|          |           | 0           |          | 1           |          | 2           |          | 3           |          |             | 4        |             |
|          |           | % Abundance | RT (min) | % Abundance |
| 5 d      | no imides | 97.46       | 9.41     | 0.61        | -        | 0.00        | -        | 0.00        | -        | 0.00        | -        | 0.00        |
|          |           |             | 9.65     |             |          |             |          |             |          |             |          |             |
|          |           |             | 9.69     |             |          |             |          |             |          |             |          |             |
|          | 1 imide   | 0.51        | -        | 0.00        | -        | 0.00        | -        | 0.00        | -        | N/A         | N/A      | 0.51        |
| 2 imides | 0.00      | -           | 0.00     | -           | 0.00     | -           | N/A      | N/A         | N/A      | N/A         | 0.00     |             |

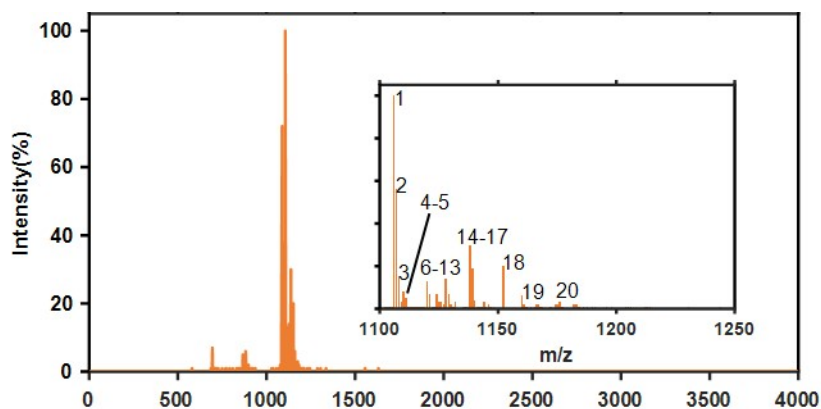

| label | Mass (Da) | Intensity (%) | Species                                                   |
|-------|-----------|---------------|-----------------------------------------------------------|
| 1     | 1106.1    | 100           | [ $\alpha$ CT11-1OMe - H <sub>2</sub> O + H] <sup>+</sup> |
| 2     | 1107.1    | 56            |                                                           |
| 3     | 1108.1    | 15            |                                                           |
| 4     | 1110.1    | 8             | [ $\alpha$ CT11 + H] <sup>+</sup>                         |
| 5     | 1111.1    | 5             |                                                           |
| 6     | 1120.2    | 13            | [ $\alpha$ CT11-2OMe - H <sub>2</sub> O + H] <sup>+</sup> |
| 7     | 1121.1    | 7             |                                                           |
| 8     | 1124.1    | 7             | [ $\alpha$ CT11-1OMe + H] <sup>+</sup>                    |
| 9     | 1125.1    | 3             |                                                           |
| 10    | 1126.0    | 3             |                                                           |
| 11    | 1128.0    | 14            | $\alpha$ CT11-1OMe - H <sub>2</sub> O + Na] <sup>+</sup>  |
| 12    | 1129.1    | 7             |                                                           |
| 13    | 1132.0    | 3             | [ $\alpha$ CT11 + Na] <sup>+</sup>                        |
| 14    | 1138.1    | 30            | [ $\alpha$ CT11-2OMe + H] <sup>+</sup>                    |
| 15    | 1139.2    | 19            |                                                           |
| 16    | 1140.1    | 4             |                                                           |
| 17    | 1144.1    | 3             | [ $\alpha$ CT11-1OMe - H <sub>2</sub> O + K] <sup>+</sup> |
| 18    | 1152.2    | 20            | [ $\alpha$ CT11-3OMe + H] <sup>+</sup>                    |
| 19    | 1160.1    | 6             | [ $\alpha$ CT11-2OMe + Na] <sup>+</sup>                   |
| 20    | 1176.1    | 3             | [ $\alpha$ CT11-2OMe + K] <sup>+</sup>                    |

**Figure S43.** MALDI-TOF MS of  $\alpha$ CT11-3OMe(D5,D6,E8) after 2 h of incubation into 1X PBS. Peaks related to esterified  $\alpha$ CT11 with the loss of either 1 or 2 H<sub>2</sub>O molecules suggest the formation of intramolecular imides/amides.

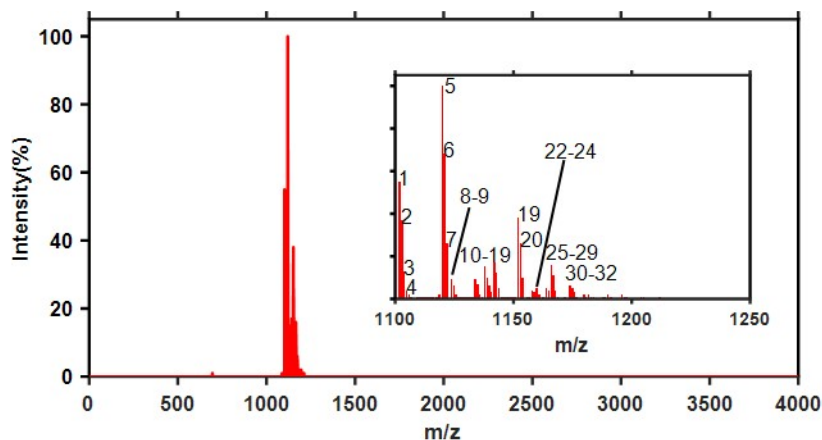

| label | Mass (Da) | Intensity (%) | Species                                                                                              |
|-------|-----------|---------------|------------------------------------------------------------------------------------------------------|
| 1     | 1101.9    | 55            | [ $\alpha$ CT11-2OMe - 2 H <sub>2</sub> O + H] <sup>+</sup>                                          |
| 2     | 1102.9    | 37            |                                                                                                      |
| 3     | 1103.8    | 13            |                                                                                                      |
| 4     | 1104.8    | 4             |                                                                                                      |
| 5     | 1119.9    | 100           | [ $\alpha$ CT11-2OMe - H <sub>2</sub> O + H] <sup>+</sup>                                            |
| 6     | 1120.9    | 68            |                                                                                                      |
| 7     | 1121.9    | 26            | [ $\alpha$ CT11-1OMe H] <sup>+</sup> or [ $\alpha$ CT11-2OMe - 2 H <sub>2</sub> O + Na] <sup>+</sup> |
| 8     | 1123.9    | 9             |                                                                                                      |
| 9     | 1124.8    | 6             | [ $\alpha$ CT11-3OMe - H <sub>2</sub> O + H] <sup>+</sup>                                            |
| 10    | 1133.9    | 9             |                                                                                                      |
| 11    | 1134.9    | 7             | [ $\alpha$ CT11-2OMe + H] <sup>+</sup>                                                               |
| 12    | 1137.9    | 15            |                                                                                                      |
| 13    | 1138.9    | 10            | [ $\alpha$ CT11-2OMe - 2 H <sub>2</sub> O + K] <sup>+</sup>                                          |
| 14    | 1139.9    | 6             |                                                                                                      |
| 15    | 1140.7    | 3             | [ $\alpha$ CT11-2OMe - H <sub>2</sub> O + Na] <sup>+</sup>                                           |
| 16    | 1141.9    | 17            |                                                                                                      |
| 17    | 1142.9    | 12            | [ $\alpha$ CT11-3OMe + H] <sup>+</sup>                                                               |
| 18    | 1143.8    | 5             |                                                                                                      |
| 19    | 1151.9    | 38            | [ $\alpha$ CT11-2OMe - H <sub>2</sub> O + K] <sup>+</sup>                                            |
| 20    | 1153.0    | 26            |                                                                                                      |
| 21    | 1153.8    | 10            | [ $\alpha$ CT11-2OMe + Na] <sup>+</sup>                                                              |
| 22    | 1157.9    | 4             |                                                                                                      |
| 23    | 1158.8    | 3             | [ $\alpha$ CT11-2OMe - H <sub>2</sub> O + 2 Na - H] <sup>+</sup>                                     |
| 24    | 1159.9    | 5             |                                                                                                      |
| 25    | 1163.9    | 5             | [ $\alpha$ CT11-4OMe + H] <sup>+</sup>                                                               |
| 26    | 1164.9    | 4             |                                                                                                      |
| 27    | 1166.0    | 16            | [ $\alpha$ CT11-3OMe + Na] <sup>+</sup>                                                              |
| 28    | 1166.9    | 11            |                                                                                                      |
| 29    | 1167.8    | 4             | [ $\alpha$ CT11-3OMe + Na] <sup>+</sup>                                                              |
| 30    | 1173.9    | 6             |                                                                                                      |
| 31    | 1174.9    | 5             |                                                                                                      |
| 32    | 1175.9    | 3             |                                                                                                      |

**Figure S44.** MALDI-TOF MS of  $\alpha$ CT11-4OMe after 2 h of incubation into 1X PBS. Peaks related to esterified  $\alpha$ CT11 with the loss of either 1 or 2 H<sub>2</sub>O molecules suggest the formation of intramolecular imides/amides.

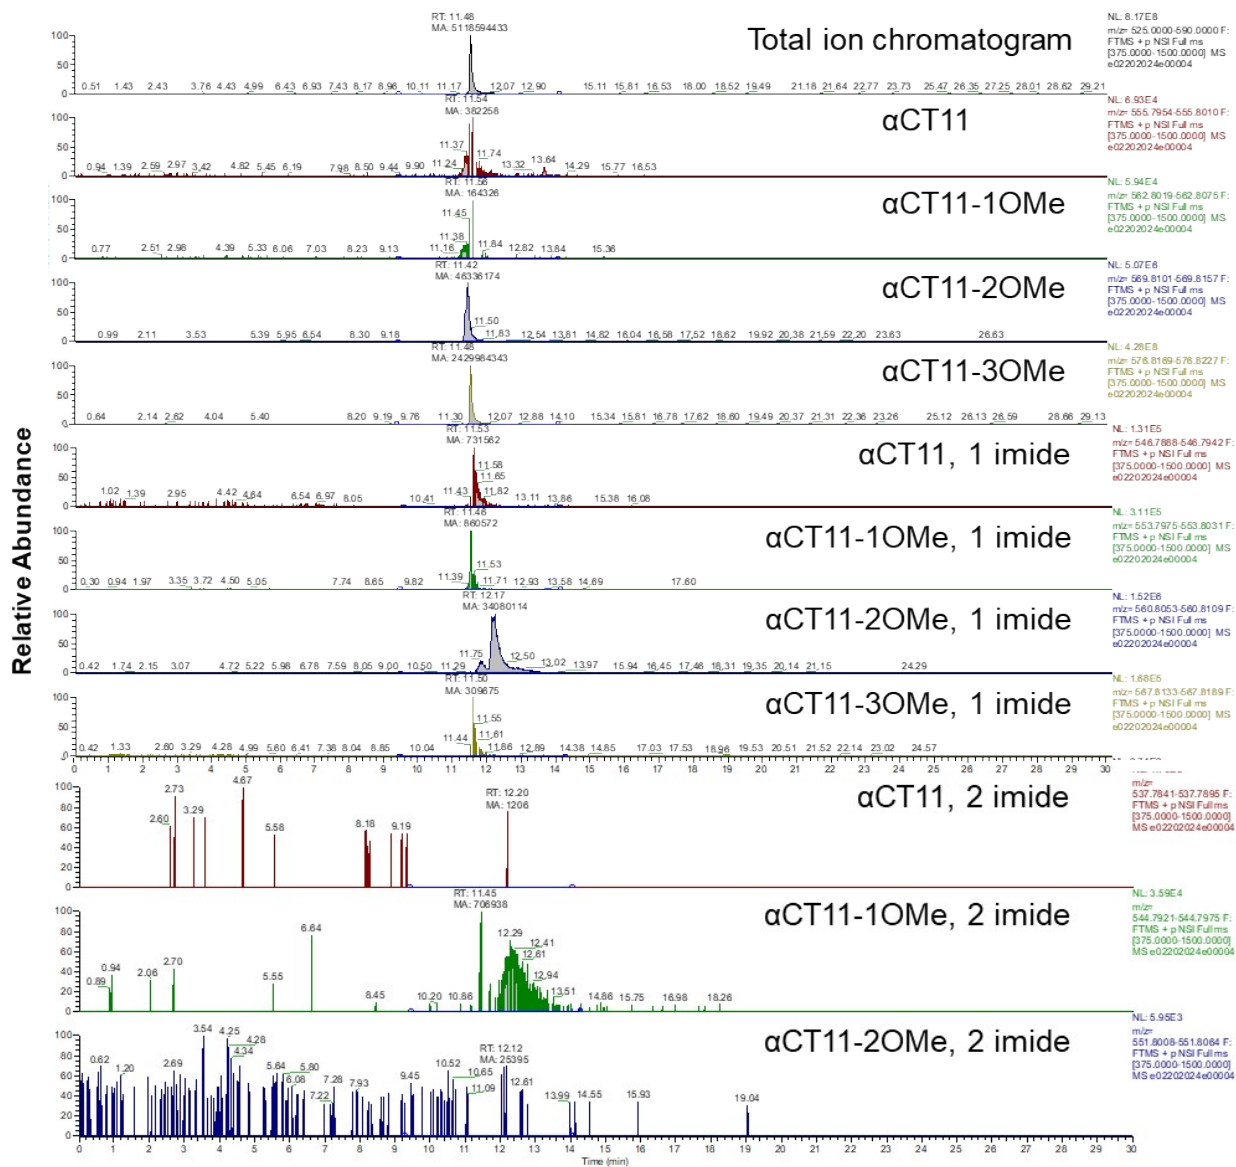

**Figure S45.** LC-MS chromatograms of  $\alpha$ CT11-3OMe(D5,D6,E8) after 5 min of incubation in 37 °C 1X PBS (pH 7.4). Total ion chromatogram (top, gray) and selective ion chromatograms for  $\alpha$ CT11 with different numbers of esters and/or imides.

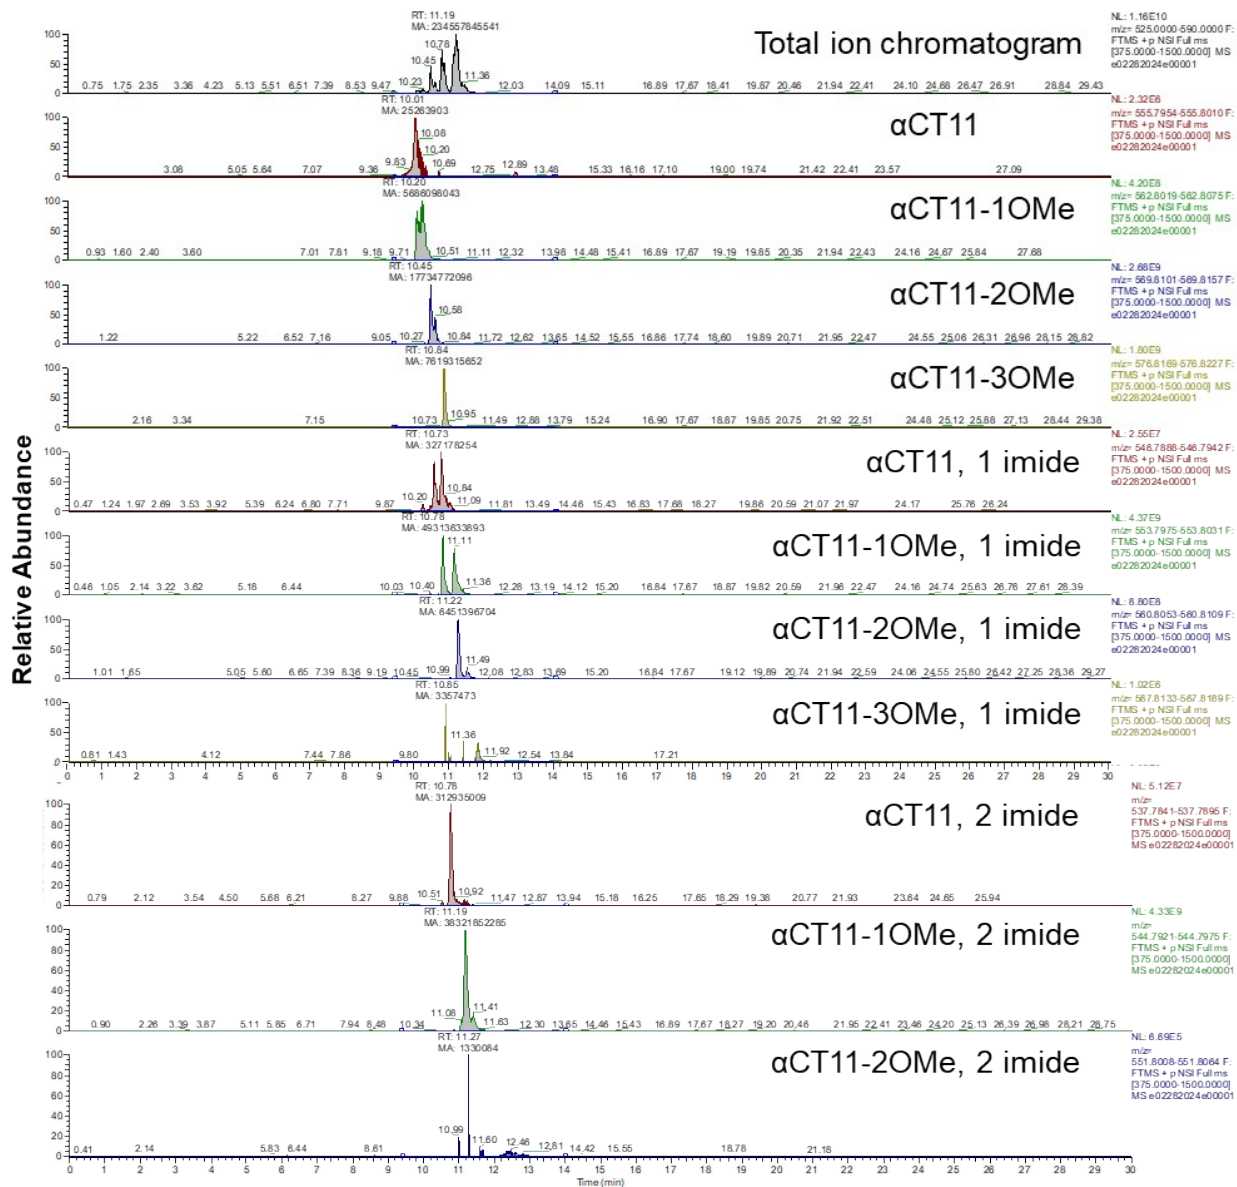

**Figure S46.** LC-MS chromatograms of αCT11-3OMe(D5,D6,E8) after 2 h of stirring in 1X PBS (pH 7.4) at 37 °C. Total ion chromatogram (top, gray) and selective ion chromatograms for αCT11 with different numbers of esters and/or imides.



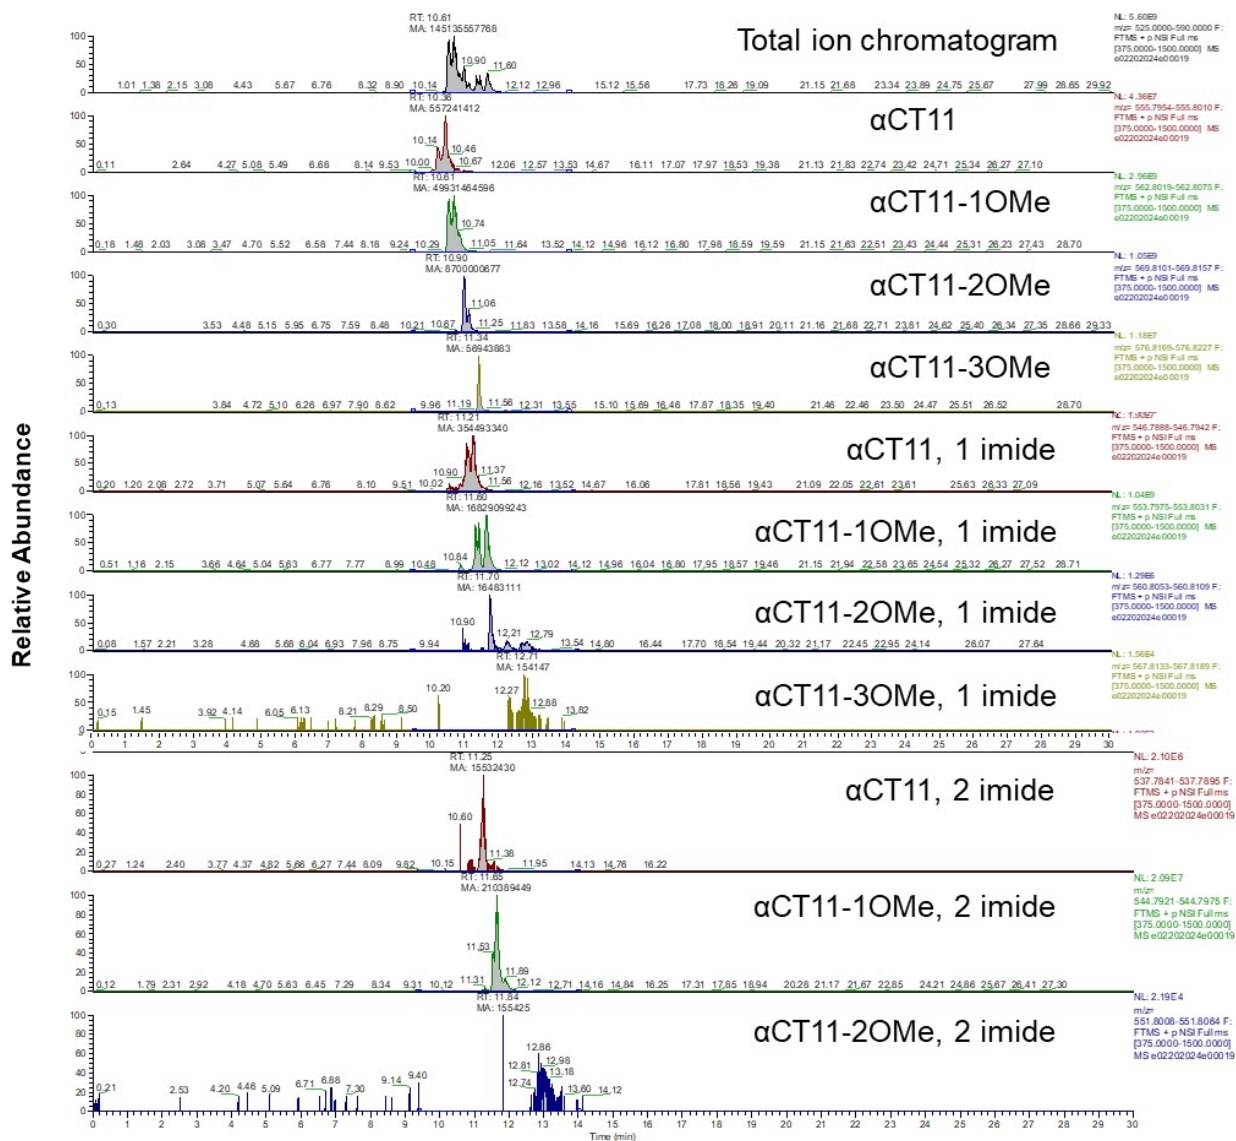

**Figure S47.** LC-MS chromatograms of  $\alpha$ CT11-3OMe(D5,D6,E8) after 6 h of stirring in 1X PBS (pH 7.4) at 37 °C. Total ion chromatogram (top, gray) and selective ion chromatograms for  $\alpha$ CT11 with different numbers of esters and/or imides.

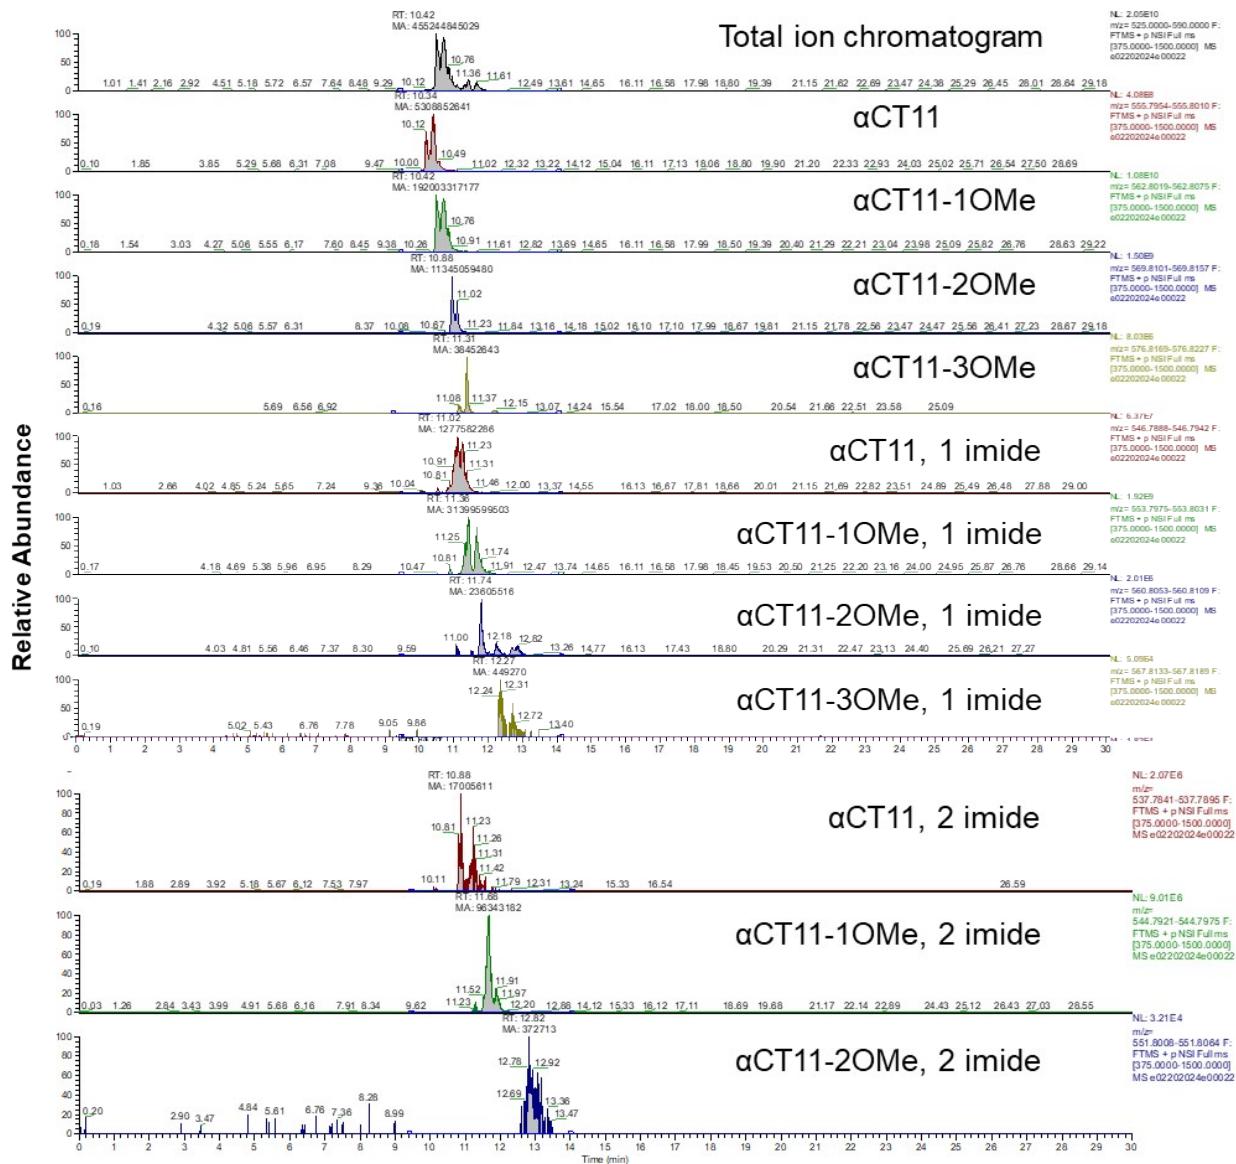

**Figure S48.** LC-MS chromatograms of  $\alpha$ CT11-3OMe(D5,D6,E8) after 12 h of stirring in 1X PBS (pH 7.4) at 37 °C. Total ion chromatogram (top, gray) and selective ion chromatograms for  $\alpha$ CT11 with different numbers of esters and/or imides.



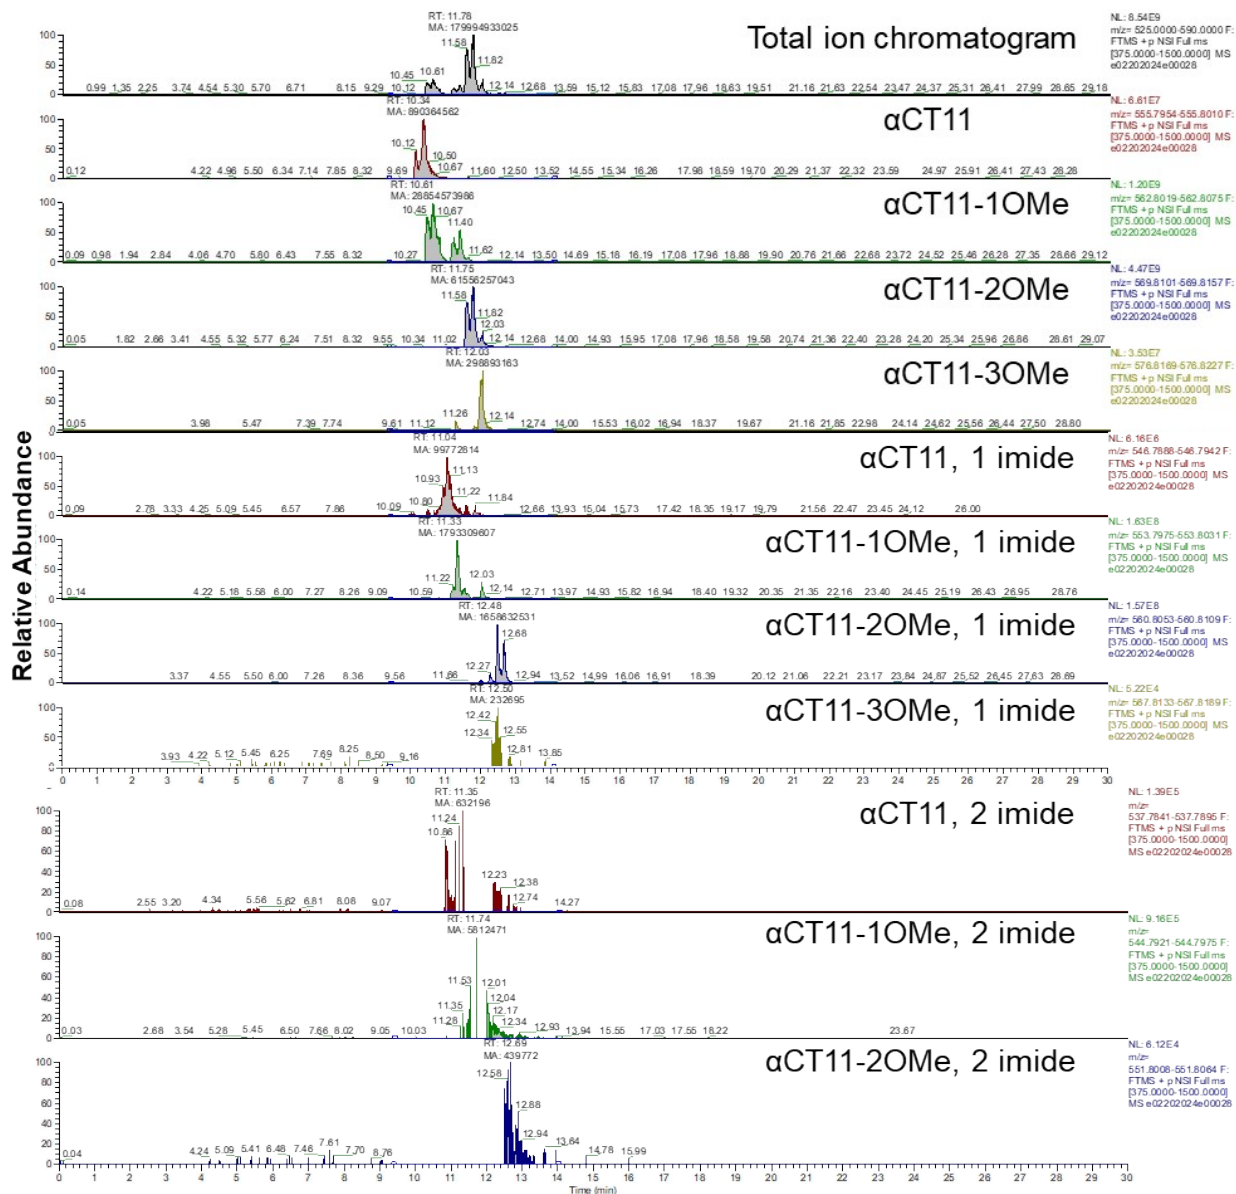

**Figure S49.** LC-MS chromatograms of  $\alpha$ CT11-3OMe(D5,D6,E8) after 24 h of stirring in 1X PBS (pH 7.4) at 37 °C. Total ion chromatogram (top, gray) and selective ion chromatograms for  $\alpha$ CT11 with different numbers of esters and/or imides.

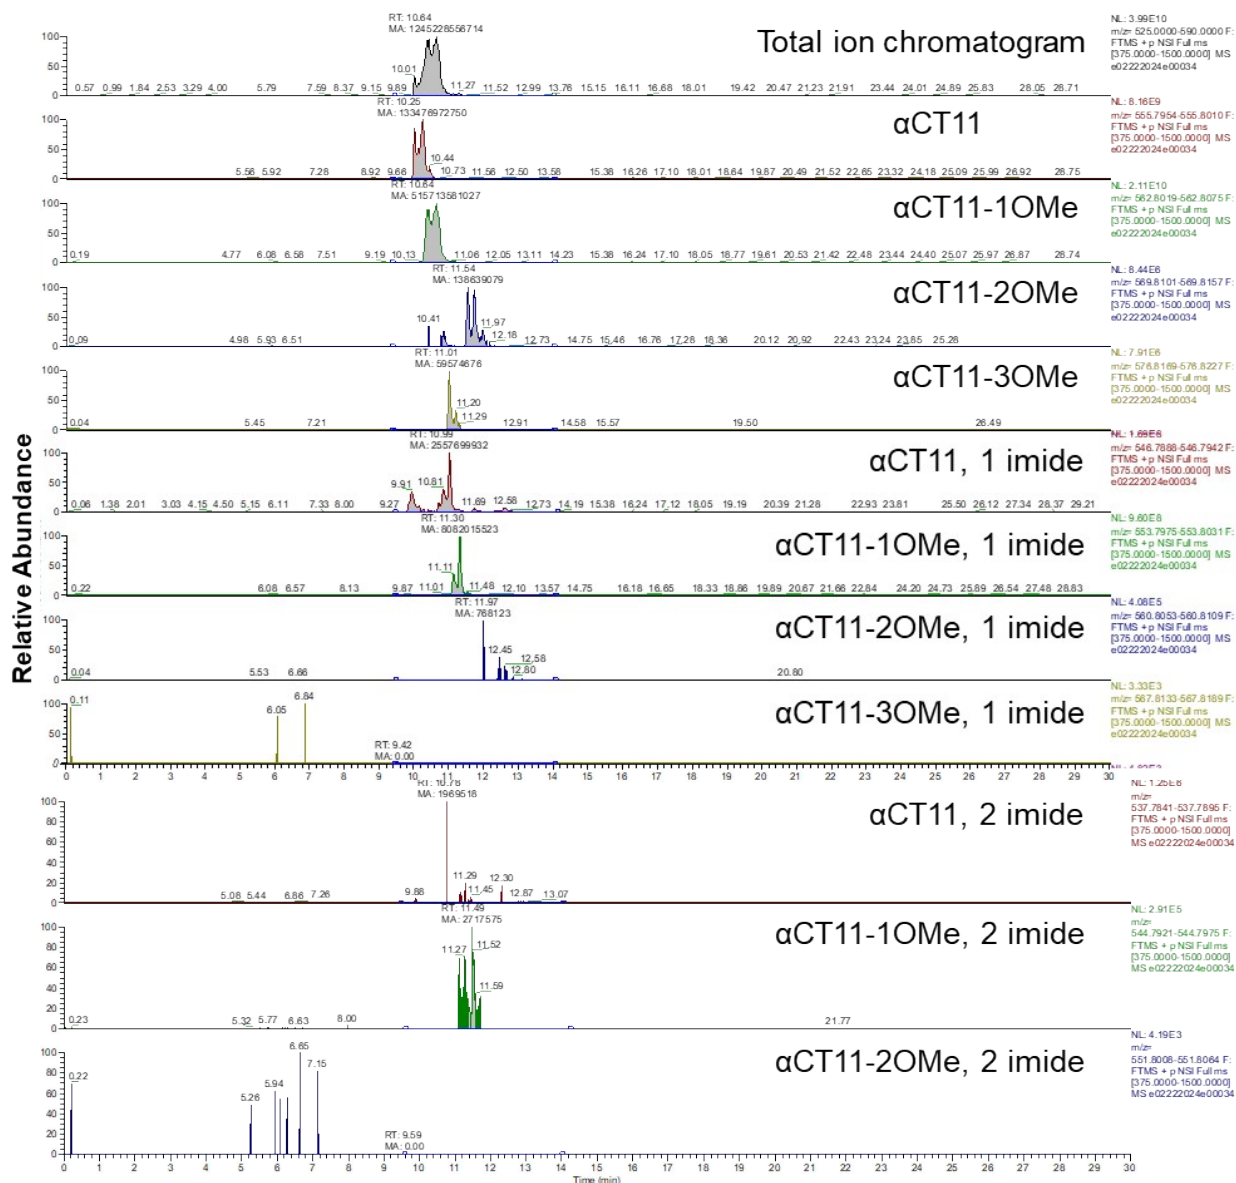

**Figure S50.** LC-MS chromatograms of  $\alpha$ CT11-3OMe(D5,D6,E8) after 1 week of stirring in 1X PBS (pH 7.4) at 37 °C. Total ion chromatogram (top, gray) and selective ion chromatograms for  $\alpha$ CT11 with different numbers of esters and/or imides.

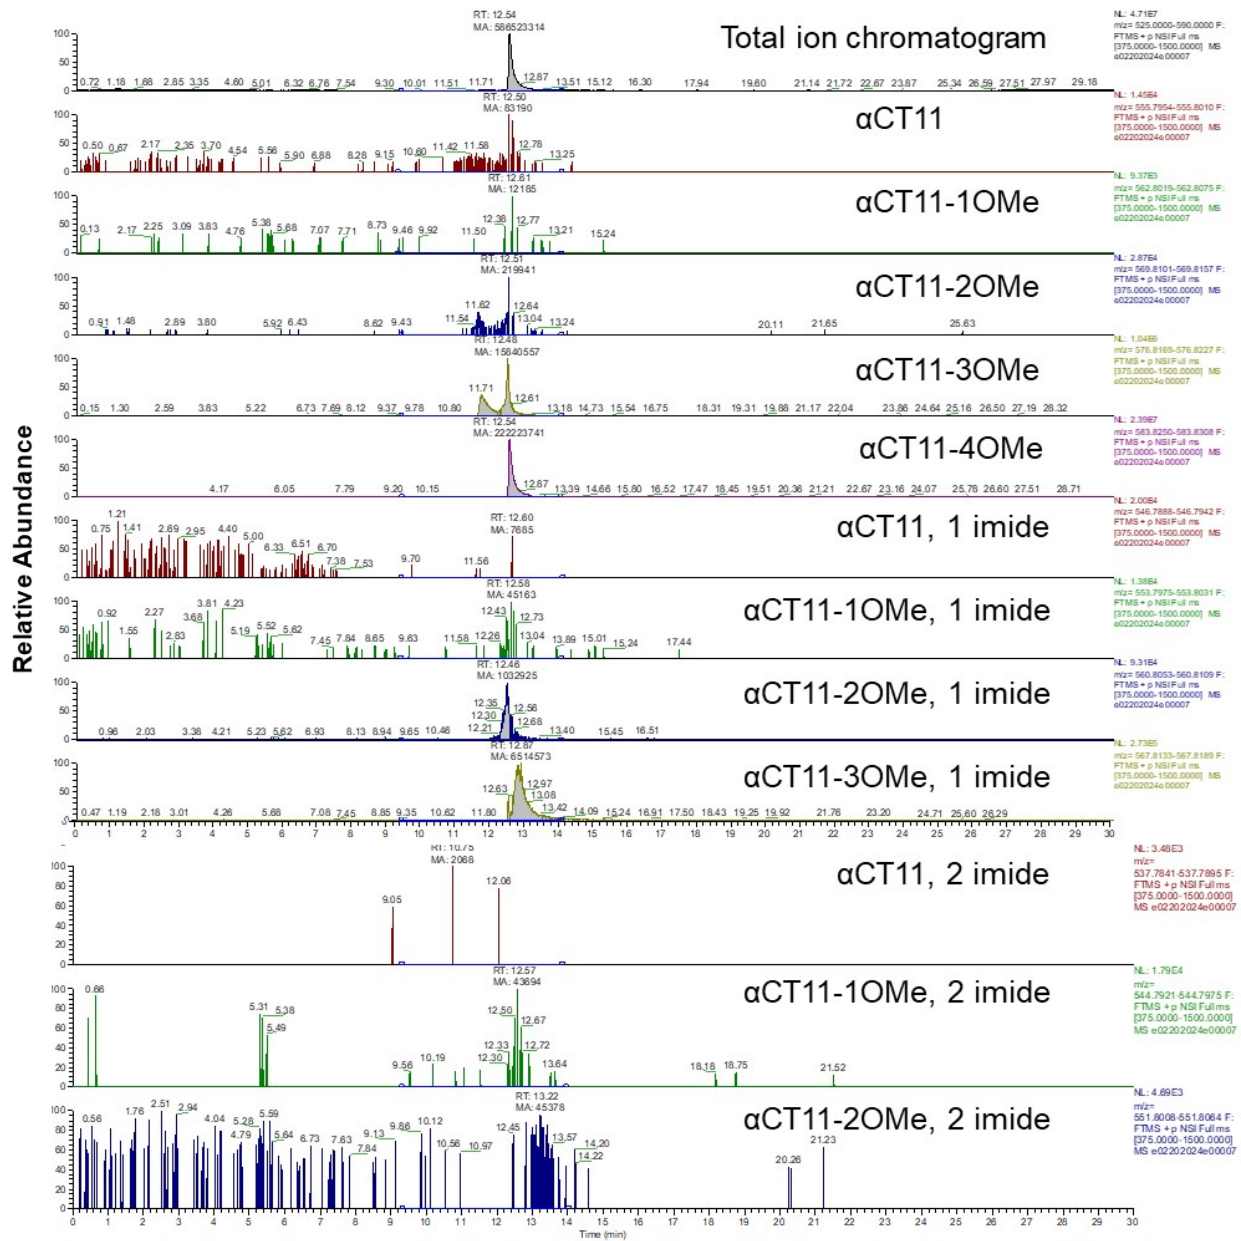

**Figure S51.** LC-MS chromatograms of  $\alpha$ CT11-4OMe after 5 min of incubation in 37 °C 1X PBS (pH 7.4). Total ion chromatogram (top, gray) and selective ion chromatograms for  $\alpha$ CT11 with different numbers of esters and/or imides.

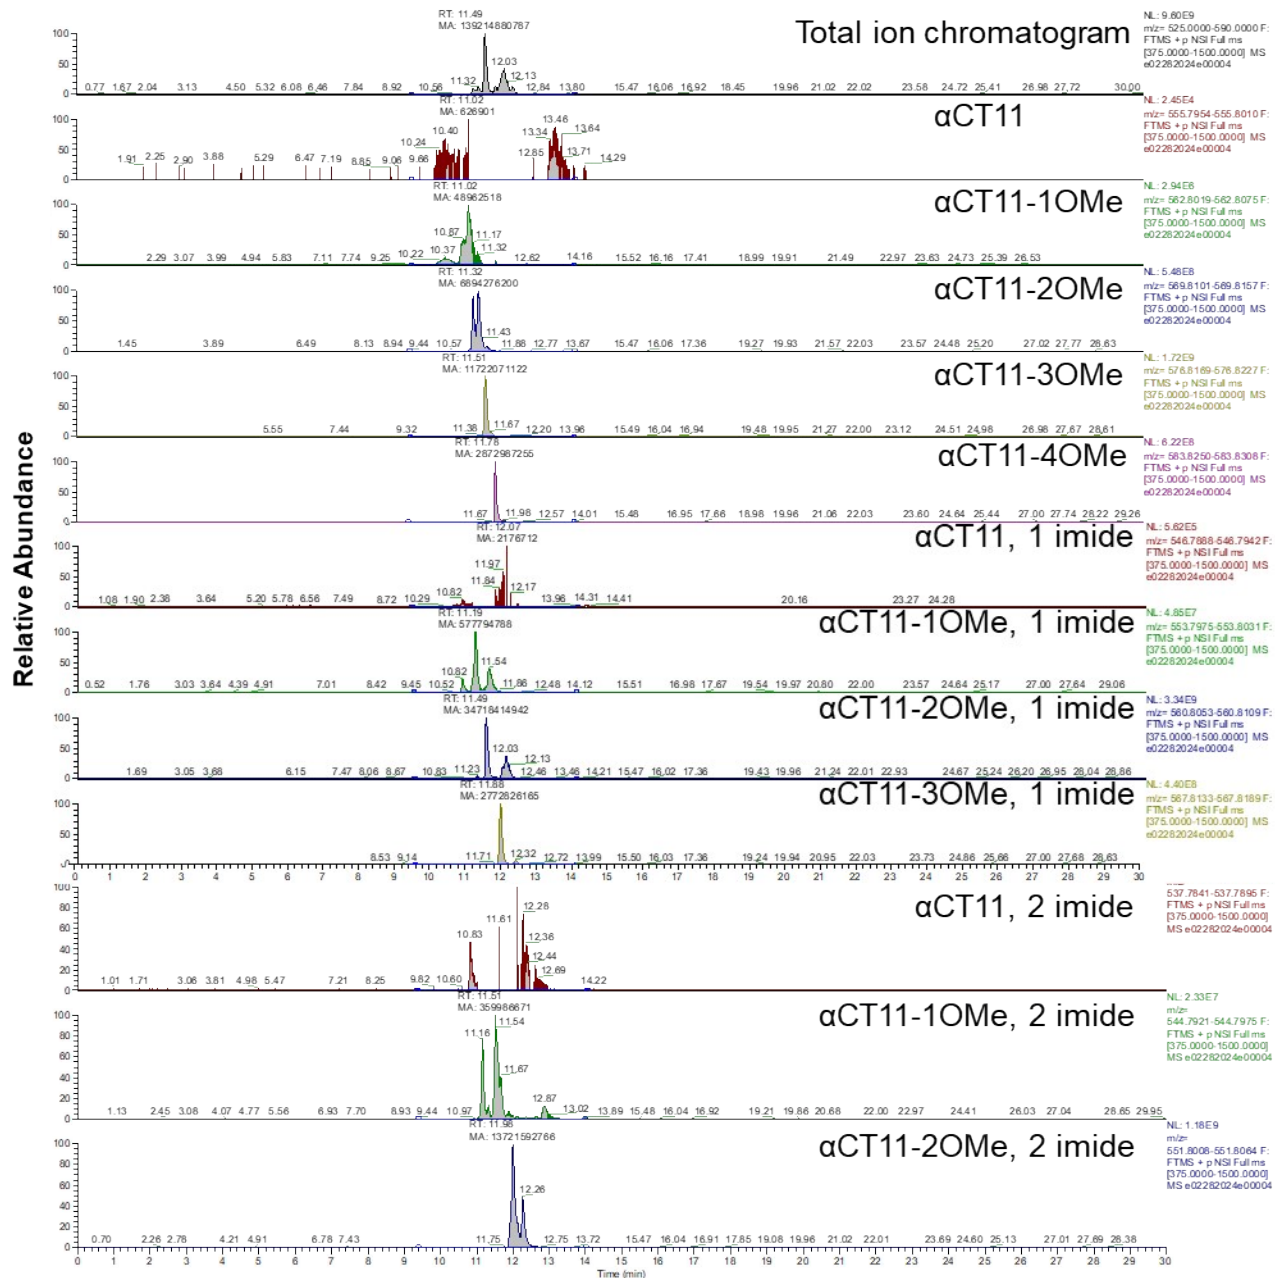

**Figure S52.** LC-MS chromatograms of αCT11-4OMe after 2 h of stirring in 1X PBS (pH 7.4) at 37 °C. Total ion chromatogram (top, gray) and selective ion chromatograms for αCT11 with different numbers of esters and/or imides.

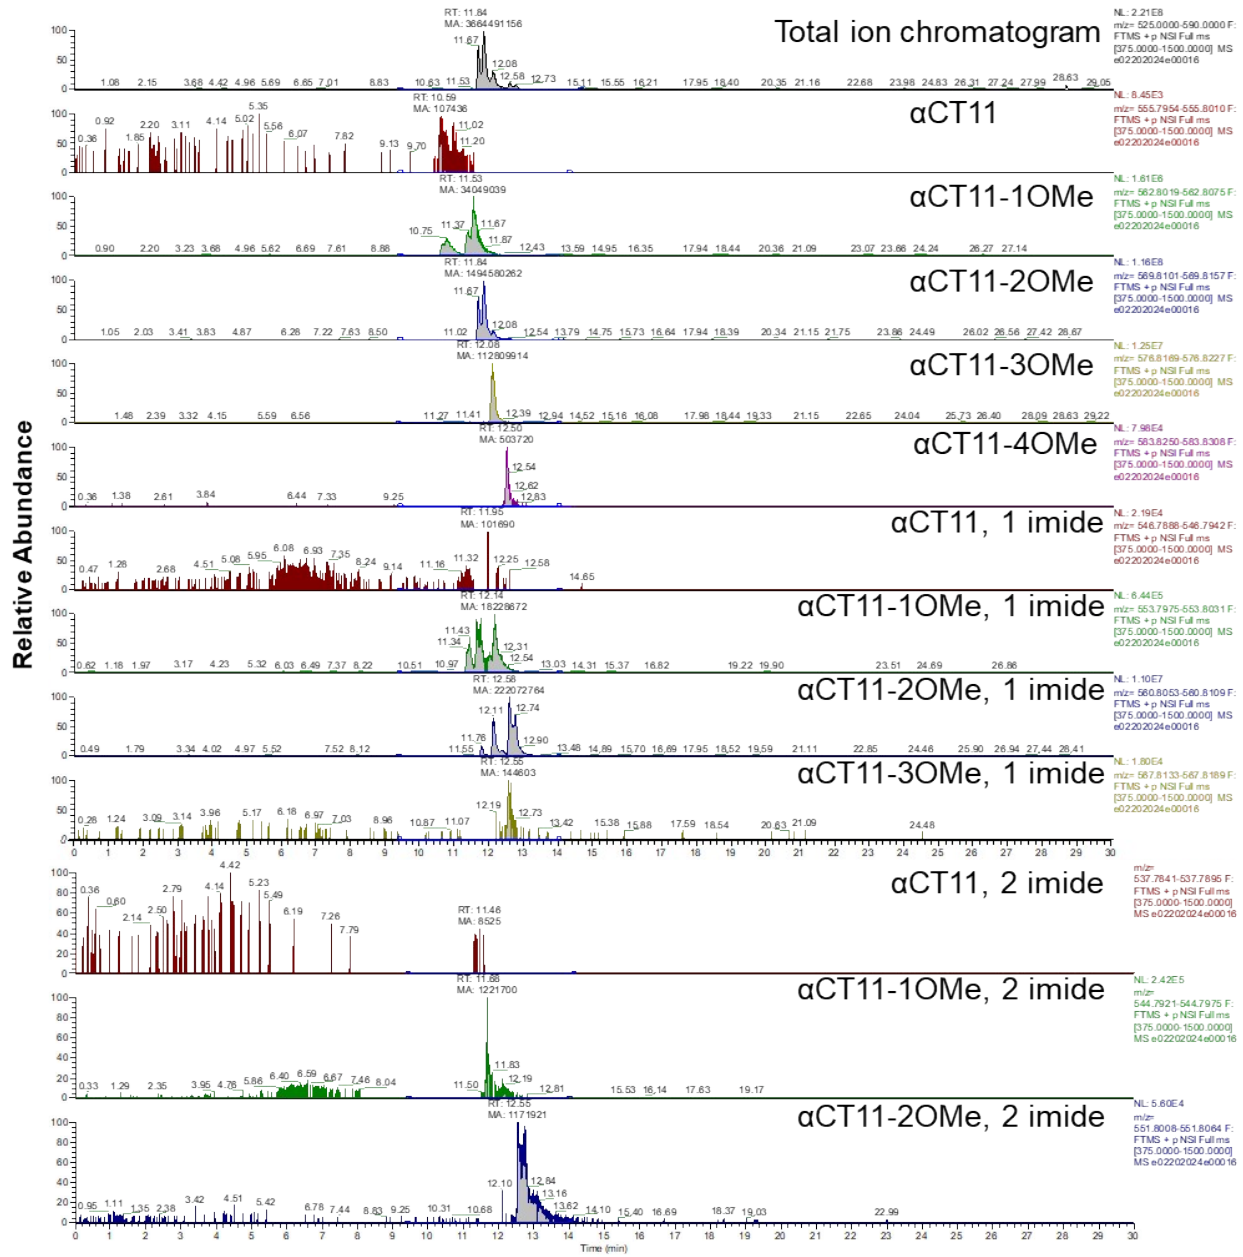

**Figure S53.** LC-MS chromatograms of  $\alpha$ CT11-4OMe after 6 h of stirring in 1X PBS (pH 7.4) at 37 °C. Total ion chromatogram (top, gray) and selective ion chromatograms for  $\alpha$ CT11 with different numbers of esters and/or imides.



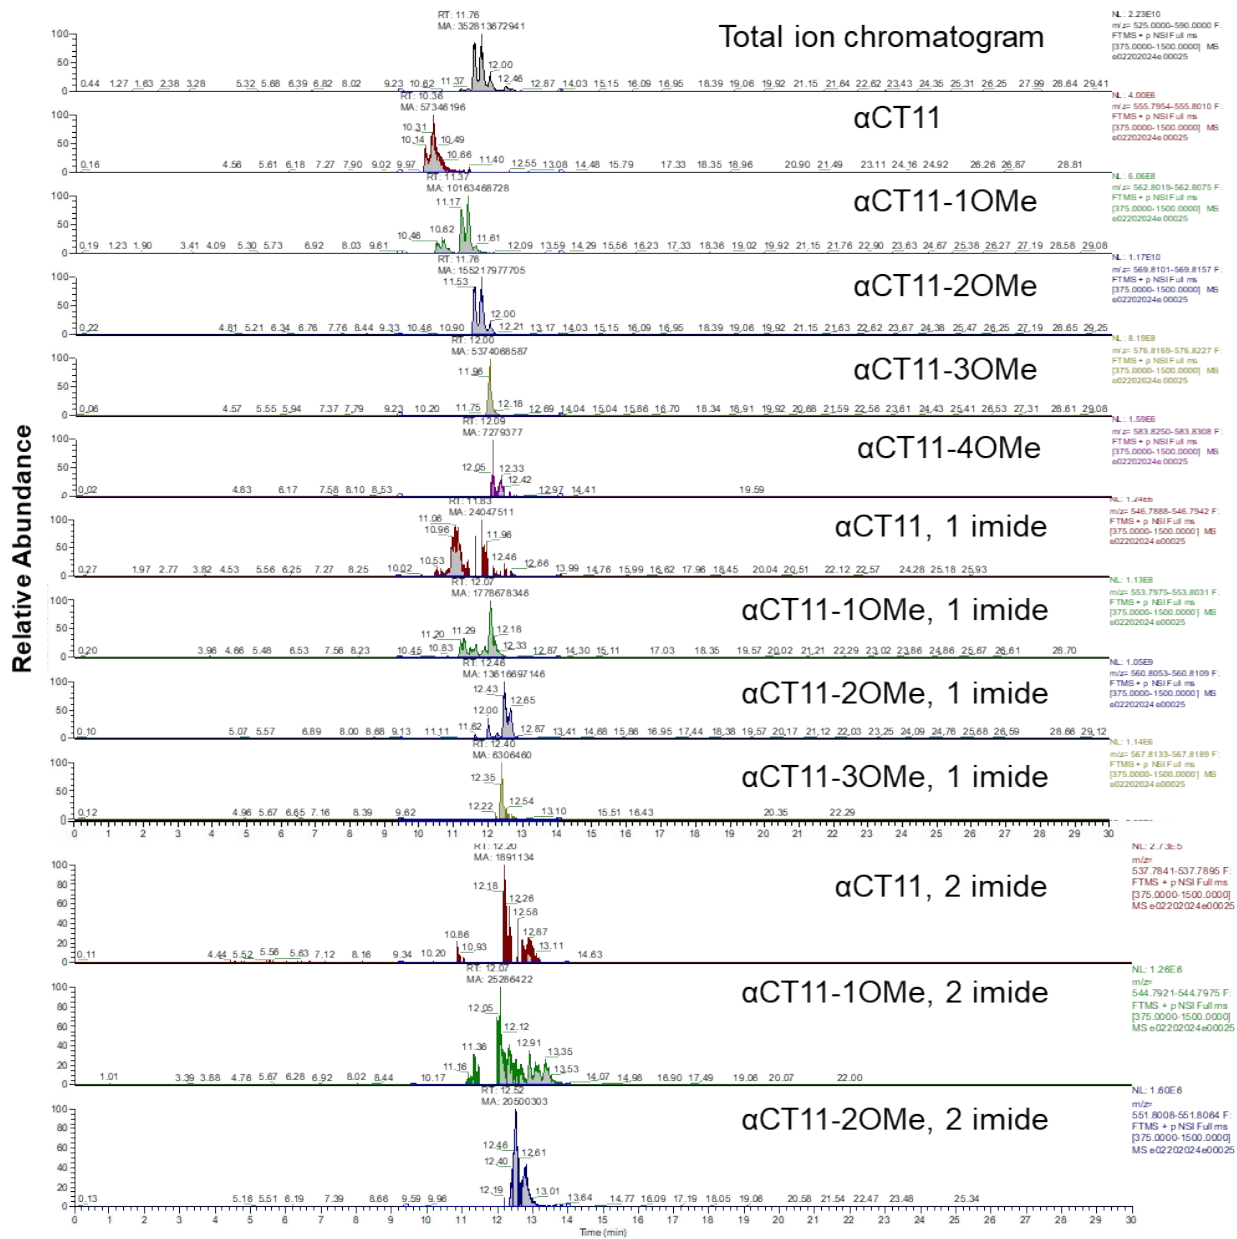

**Figure S54.** LC-MS chromatograms of  $\alpha$ CT11-4OMe after 12 h of stirring in 1X PBS (pH 7.4) at 37 °C. Total ion chromatogram (top, gray) and selective ion chromatograms for  $\alpha$ CT11 with different numbers of esters and/or imides.

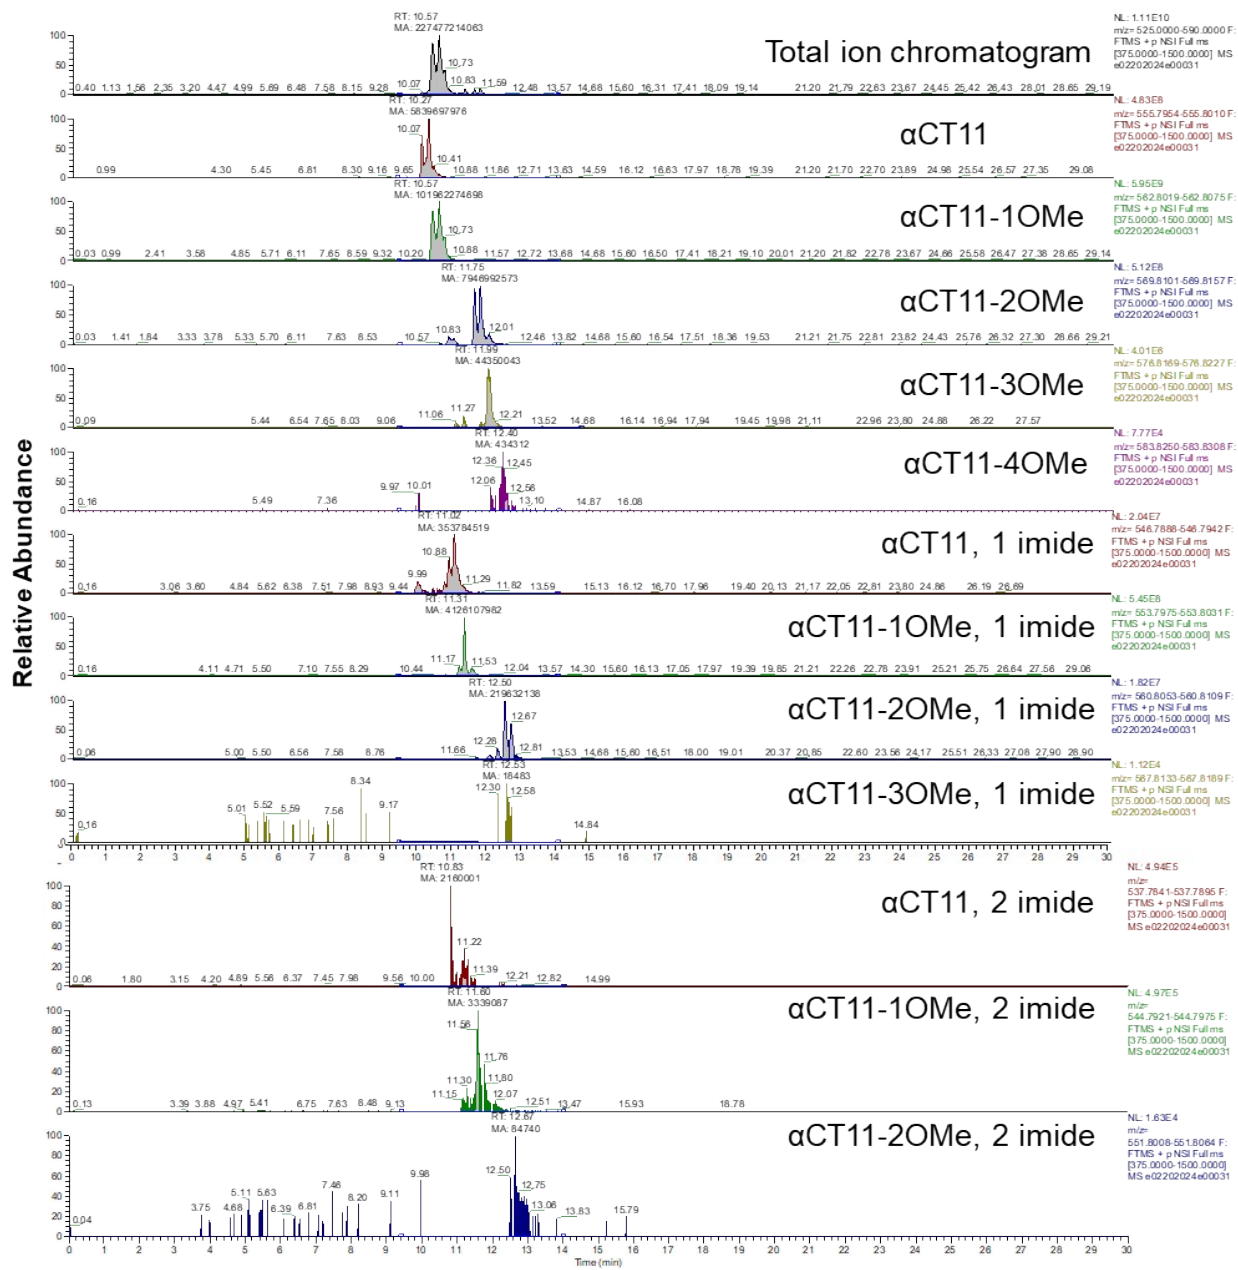

**Figure S55.** LC-MS chromatograms of  $\alpha$ CT11-4OMe after 24 h of stirring in 1X PBS (pH 7.4) at 37 °C. Total ion chromatogram (top, gray) and selective ion chromatograms for  $\alpha$ CT11 with different numbers of esters and/or imides.

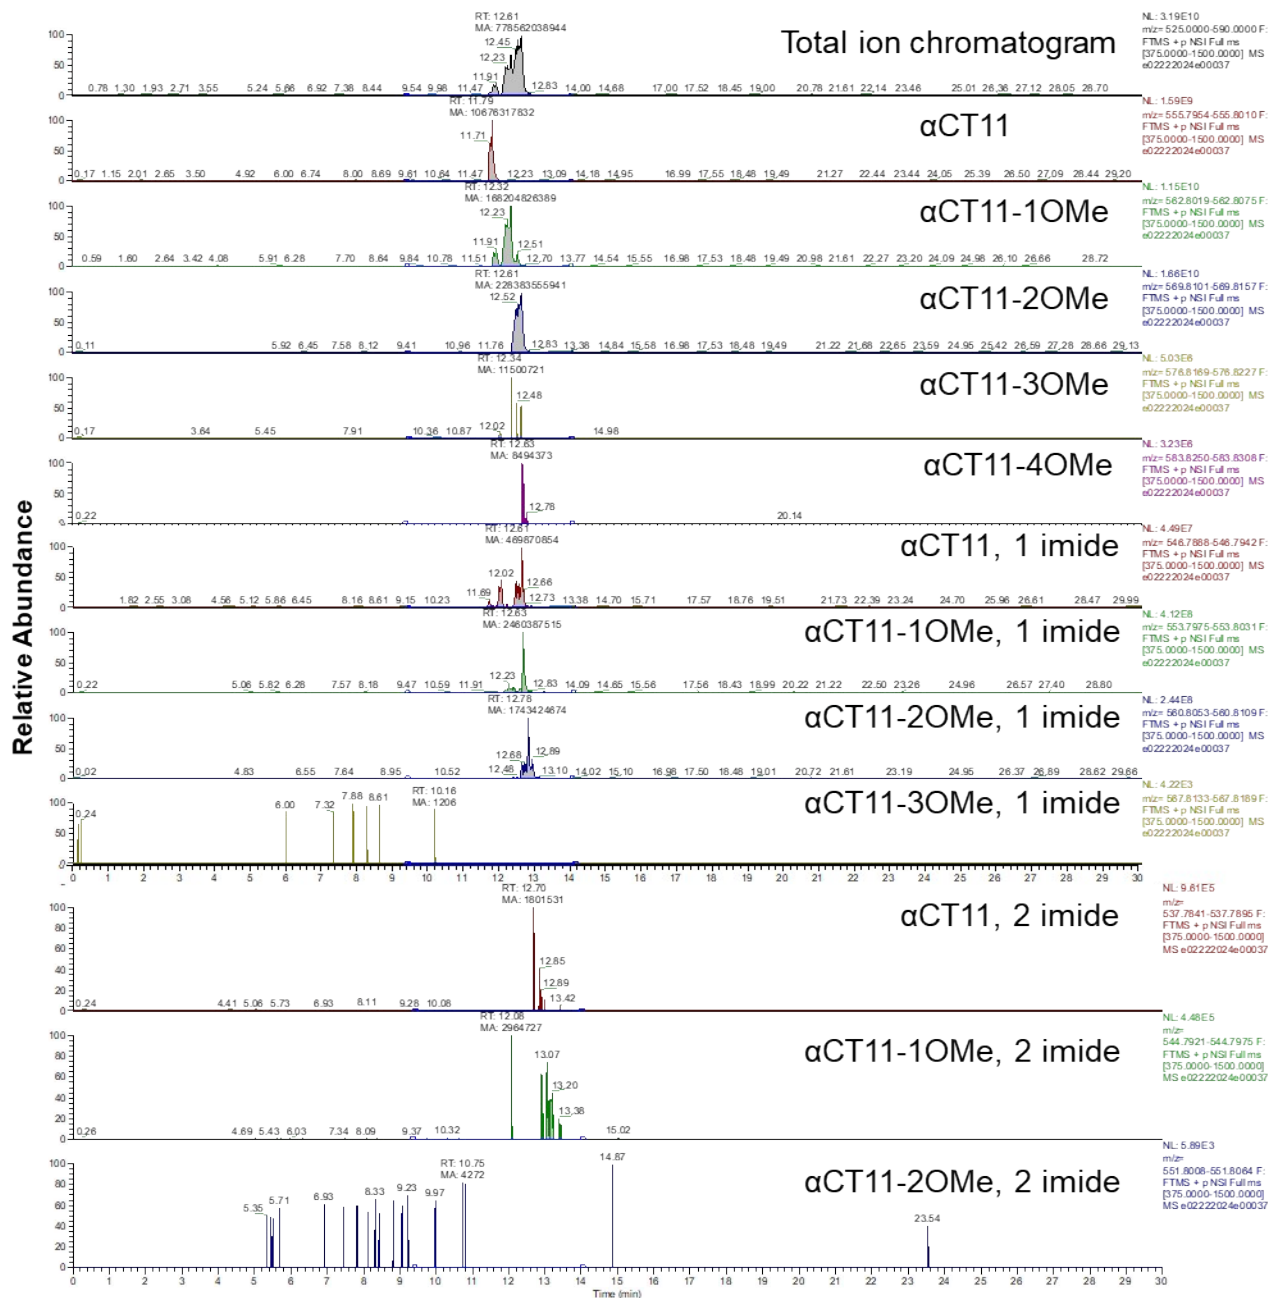

**Figure S56.** LC-MS chromatograms of  $\alpha$ CT11-4OMe after 1 week of stirring in 1X PBS (pH 7.4) at 37 °C. Total ion chromatogram (top, gray) and selective ion chromatograms for  $\alpha$ CT11 with different numbers of esters and/or imides.



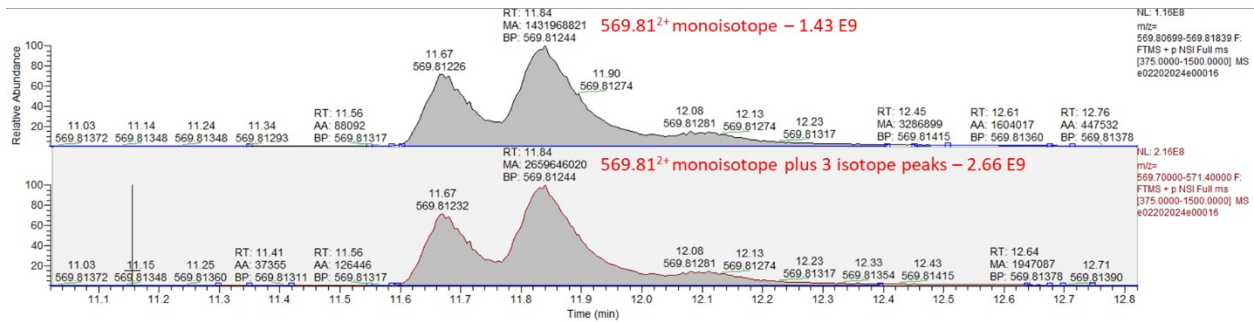

#02202024e00016 #2293-2456 RT: 11.65-12.27 AV: 114 NL: 3.55E7  
T: FTMS + p NSI Full ms [375.0000-1500.0000]

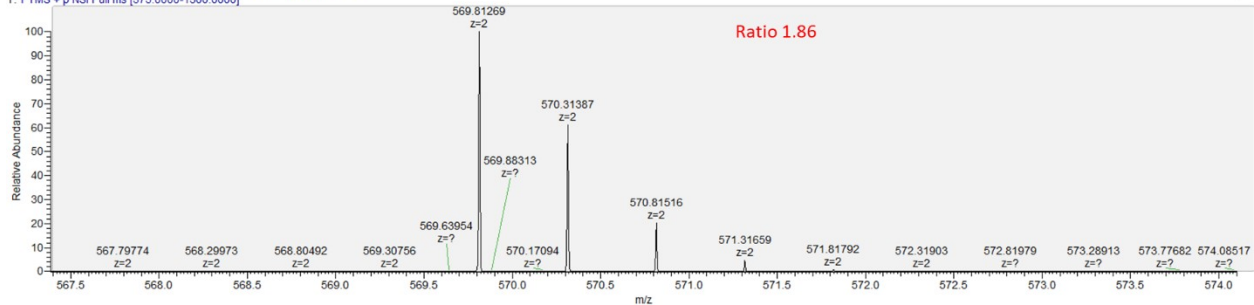

**Figure S57.** LC-MS chromatograms of relevant isotopes of  $\alpha$ CT11-3OMe(D5,D6,E8) after 5 min of incubation in 37 °C 1X PBS (pH 7.4). The ratio of the area of the monoisotope (569.81) and 3 additional isotope peaks in the chromatogram to just the area of the monoisotope is 1.86; thus, all monoisotope selective ion chromatogram areas were multiplied by 1.9 to account for the additional isotopes.

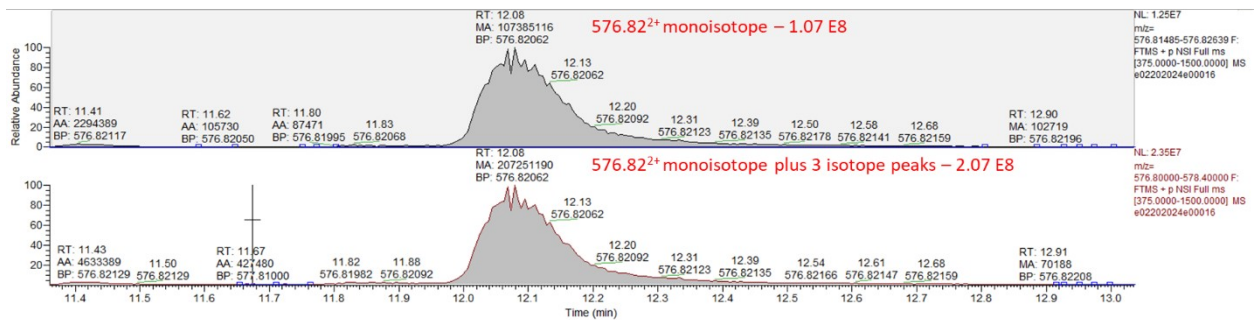

#02202024e00016 #2293-2456 RT: 11.65-12.27 AV: 114 NL: 2.46E6  
T: FTMS + p NSI Full ms [375.0000-1500.0000]

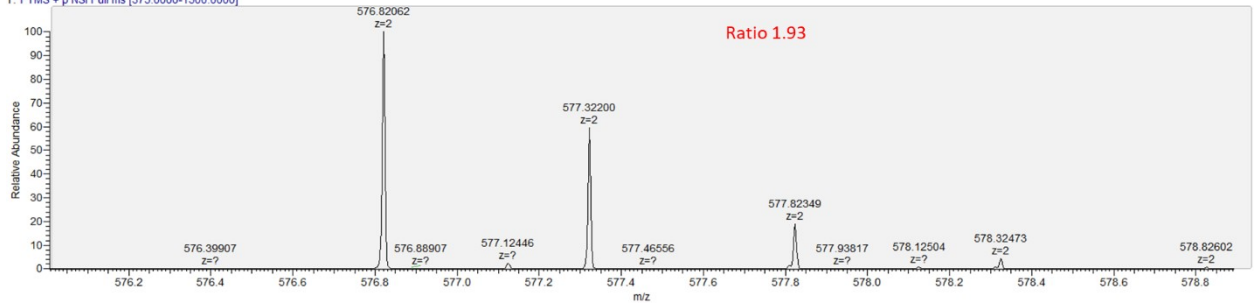

**Figure S58.** LC-MS chromatograms of relevant isotopes of  $\alpha$ CT11-4OMe after 5 min of incubation in 37 °C 1X PBS (pH 7.4). The ratio of the area of the monoisotope (576.82) and 3 additional isotope peaks in the chromatogram to just the area of the monoisotope is 1.93; thus, all monoisotope selective ion chromatogram areas were multiplied by 1.9 to account for the additional isotopes.

**Table S12.** % Abundance and retention times (RT, min) of  $\alpha$ CT11-based formulations produced by the hydrolysis of  $\alpha$ CT11-3OMe(D5,D6,E8) in 37 °C 1X PBS over 7 d, quantified by LC-MS.

|         |           | Ester #     |                |             |                         |             |                         |             |          |             |          | Total |
|---------|-----------|-------------|----------------|-------------|-------------------------|-------------|-------------------------|-------------|----------|-------------|----------|-------|
|         |           | 0           |                | 1           |                         | 2           |                         | 3           |          | 4           |          |       |
|         |           | % Abundance | RT (min)       | % Abundance | RT (min)                | % Abundance | RT (min)                | % Abundance | RT (min) | % Abundance | RT (min) |       |
| Initial | no imides | 0.01        | -              | 0.01        | -                       | 1.72        | 11.40                   | 90.20       | 11.48    | N/A         | N/A      | 91.94 |
|         | 1 imide   | 0.03        | -              | 0.03        | -                       | 0.01        | -                       | 0.01        | -        | N/A         | N/A      | 0.08  |
|         | 2 imides  | 0.00        | -              | 0.03        | -                       | 0.00        | -                       | N/A         | N/A      | N/A         | N/A      | 0.03  |
| 2 h     | no imides | 0.02        | -              | 4.61        | 10.20<br>10.10          | 14.37       | 10.45<br>10.58          | 6.17        | 10.84    | N/A         | N/A      | 25.16 |
|         | 1 imides  | 0.27        | -              | 39.95       | 10.78<br>11.11          | 5.23        | 11.22<br>11.49          | 0.00        | -        | N/A         | N/A      | 45.44 |
|         | 2 imides  | 0.25        | -              | 31.04       | 11.19                   | 0.00        | -                       | N/A         | N/A      | N/A         | N/A      | 31.30 |
| 6 h     | no imides | 0.73        | -              | 65.37       | 10.61<br>10.74          | 11.39       | 10.09<br>11.06          | 0.01        | -        | N/A         | N/A      | 77.49 |
|         | 1 imide   | 0.46        | -              | 22.03       | 11.20<br>11.40<br>11.60 | 0.02        | -                       | 0.00        | -        | N/A         | N/A      | 22.52 |
|         | 2 imides  | 0.20        | -              | 0.28        | -                       | 0.00        | -                       | N/A         | N/A      | N/A         | N/A      | 0.48  |
| 12 h    | no imides | 2.22        | 10.12<br>10.34 | 80.13       | 10.42<br>10.60          | 4.73        | 10.88<br>11.02          | 0.02        | -        | N/A         | N/A      | 87.10 |
|         | 1 imide   | 0.53        | -              | 13.10       | 11.36<br>11.60          | 0.01        | -                       | 0.00        | -        | N/A         | N/A      | 13.65 |
|         | 2 imides  | 0.01        | -              | 0.04        | -                       | 0.00        | -                       | N/A         | N/A      | N/A         | N/A      | 0.05  |
| 1 d     | no imides | 4.88        | 10.12<br>10.34 | 85.16       | 10.45<br>10.61<br>11.20 | 6.64        | 11.58<br>11.75<br>12.03 | 0.04        | -        | N/A         | N/A      | 96.72 |
|         | 1 imide   | 0.30        | -              | 3.45        | 11.22<br>11.33<br>12.03 | 0.18        | -                       | 0.00        | -        | N/A         | N/A      | 3.93  |
|         | 2 imides  | 0.00        | -              | 0.00        | -                       | 0.00        | -                       | N/A         | N/A      | N/A         | N/A      | 0.00  |
| 7 d     | no imides | 20.37       | 10<br>10.25    | 78.69       | 10.40<br>10.64          | 0.21        | -                       | 0.01        | -        | N/A         | N/A      | 99.28 |
|         | 1 imide   | 0.39        | -              | 1.23        | 11.11<br>11.30          | 0.00        | -                       | 0.00        | -        | N/A         | N/A      | 1.62  |
|         | 2 imides  | 0.00        | -              | 0.00        | -                       | 0.00        | -                       | N/A         | N/A      | N/A         | N/A      | 0.00  |

\*Only retention times for products over 1% abundance were reported

**Table S13.** % Abundance and retention times (RT, min) of  $\alpha$ CT11-based formulations produced by the hydrolysis of  $\alpha$ CT11-4OMe in 37 °C 1X PBS over 7 d, quantified by LC-MS

|          |           | Ester #     |          |             |          |             |          |             |          |             |          | Total<br>% Abundance |
|----------|-----------|-------------|----------|-------------|----------|-------------|----------|-------------|----------|-------------|----------|----------------------|
|          |           | 0           |          | 1           |          | 2           |          | 3           |          | 4           |          |                      |
|          |           | % Abundance | RT (min) |                      |
| Initial  | no imides | 0.03        | -        | 0.00        | -        | 0.07        | -        | 5.13        | 12.48    | 71.99       | 12.54    | 77.22                |
|          | 1 imide   | 0.00        | -        | 0.01        | -        | 0.33        | -        | 2.11        | 12.87    | N/A         | N/A      | 2.46                 |
|          | 2 imides  | 0.00        | -        | 0.01        | -        | 0.01        | -        | N/A         | N/A      | N/A         | N/A      | 0.03                 |
| 2 h      | no imides | 0.00        | -        | 0.07        | -        | 9.41        | 11.20    | 16.00       | 11.51    | 3.92        | 11.78    | 29.40                |
|          |           |             |          |             |          |             | 11.32    |             |          |             |          |                      |
|          | 1 imides  | 0.00        | -        | 0.79        | -        | 47.38       | 11.49    | 3.78        | 11.88    | N/A         | N/A      | 51.96                |
|          |           |             |          |             |          |             | 12.03    |             |          |             |          |                      |
|          | 2 imides  | 0.00        | -        | 0.49        | 11.19    | 18.73       | 11.98    | N/A         | N/A      | N/A         | N/A      | 19.22                |
|          |           |             |          |             |          | 12.26       |          |             |          |             |          |                      |
| 6 h      | no imides | 0.01        | -        | 1.77        | -        | 77.49       | 10.75    | 5.85        | 12.08    | 0.03        | -        | 85.14                |
|          |           |             |          |             |          |             | 11.37    |             |          |             |          |                      |
|          |           |             |          |             |          |             | 11.53    |             |          |             |          |                      |
|          | 1 imide   | 0.01        | -        | 0.95        | -        | 11.51       | 11.87    | 0.01        | -        | N/A         | N/A      | 12.47                |
|          |           |             |          |             |          |             | 12.08    |             |          |             |          |                      |
| 2 imides | 0.00      | -           | 0.06     | -           | 0.06     | 12.11       | N/A      | N/A         | N/A      | N/A         | 0.12     |                      |
|          |           |             |          |             |          | 12.58       |          |             |          |             |          |                      |
|          |           |             |          |             |          | 12.74       |          |             |          |             |          |                      |
| 12 h     | no imides | 0.03        | -        | 5.47        | -        | 83.59       | 11.17    | 2.89        | 12.00    | 0.00        | -        | 91.99                |
|          |           |             |          |             |          |             | 11.37    |             |          |             |          |                      |
|          | 1 imide   | 0.01        | -        | 0.96        | -        | 7.33        | 11.76    | 0.00        | -        | N/A         | N/A      | 8.31                 |
|          |           |             |          |             |          |             | 12.46    |             |          |             |          |                      |
|          | 2 imides  | 0.00        | -        | 0.01        | -        | 0.01        | 12.65    | N/A         | N/A      | N/A         | N/A      | 0.03                 |
| 1 d      | no imides | 0.94        | -        | 30.46       | -        | 64.98       | 10.40    | 0.32        | -        | 0.01        | -        | 96.70                |
|          |           |             |          |             |          |             | 10.57    |             |          |             |          |                      |
|          |           |             |          |             |          |             | 10.73    |             |          |             |          |                      |
|          | 1 imide   | 0.11        | -        | 1.89        | -        | 1.75        | 11.17    | 0.00        | -        | N/A         | N/A      | 3.75                 |
|          |           |             |          |             |          |             | 11.31    |             |          |             |          |                      |
|          |           |             |          |             |          |             | 11.53    |             |          |             |          |                      |
|          | 2 imides  | 0.00        | -        | 0.01        | -        | 0.00        | 12.81    | N/A         | N/A      | N/A         | N/A      | 0.00                 |
| 7 d      | no imides | 2.61        | 11.79    | 41.05       | -        | 55.73       | 11.91    | 0.00        | -        | 0.00        | -        | 99.39                |
|          |           |             |          |             |          |             | 12.23    |             |          |             |          |                      |
|          |           |             |          |             |          |             | 12.32    |             |          |             |          |                      |
|          |           |             |          |             |          |             | 12.51    |             |          |             |          |                      |
|          | 1 imide   | 0.11        | -        | 0.60        | -        | 0.43        | 12.61    | 0.00        | -        | N/A         | N/A      | 1.14                 |
| 2 imides | 0.00      | -           | 0.00     | -           | 0.00     | -           | N/A      | N/A         | N/A      | N/A         |          |                      |

\*Only retention times for products over 1% abundance were reported

## Section S4: Activity of esterified $\alpha$ CT11

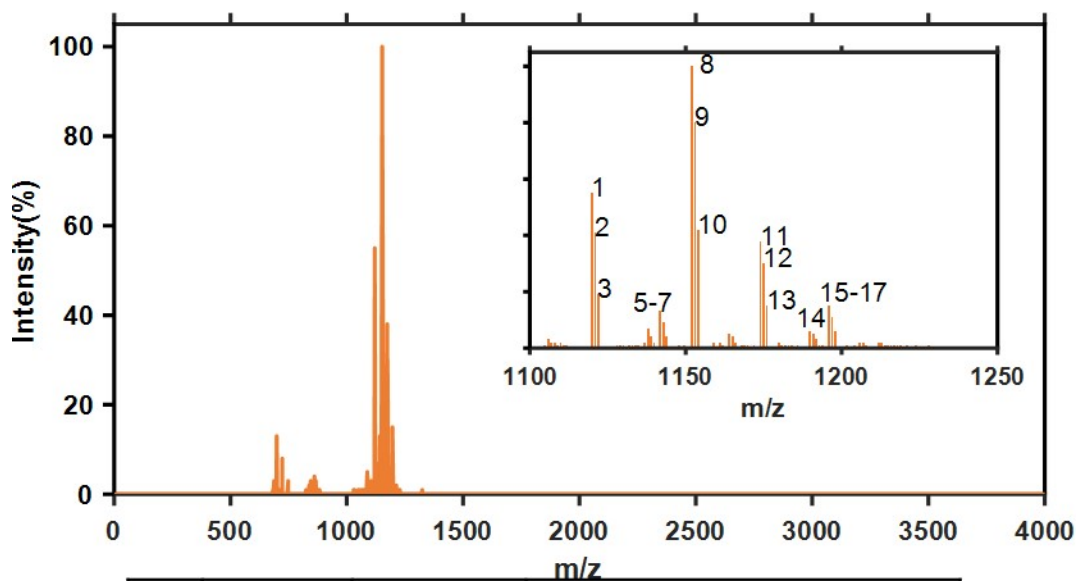

| label | Mass (Da) | Intensity (%) | Species                                                    |
|-------|-----------|---------------|------------------------------------------------------------|
| 1     | 1119.9    | 55            | $[\alpha\text{CT11-2OMe} + 1 \text{ imide} + \text{H}]^+$  |
| 2     | 1121      | 41            | $[\alpha\text{CT11-2OMe} + 1 \text{ imide} + \text{H}]^+$  |
| 3     | 1122      | 19            | $[\alpha\text{CT11-2OMe} + 1 \text{ imide} + \text{H}]^+$  |
| 4     | 1138      | 7             | $[\alpha\text{CT11-2OMe} + \text{H}]^+$                    |
| 5     | 1141.9    | 13            | $[\alpha\text{CT11-2OMe} + 1 \text{ imide} + \text{Na}]^+$ |
| 6     | 1142.8    | 9             | $[\alpha\text{CT11-2OMe} + 1 \text{ imide} + \text{Na}]^+$ |
| 7     | 1151.9    | 100           | $[\alpha\text{CT11-3OMe} + \text{H}]^+$                    |
| 8     | 1153      | 80            | $[\alpha\text{CT11-3OMe} + \text{H}]^+$                    |
| 9     | 1154      | 42            | $[\alpha\text{CT11-3OMe} + \text{H}]^+$                    |
| 10    | 1174      | 38            | $[\alpha\text{CT11-3OMe} + \text{Na}]^+$                   |
| 11    | 1174.9    | 30            | $[\alpha\text{CT11-3OMe} + \text{Na}]^+$                   |
| 12    | 1176      | 15            | $[\alpha\text{CT11-3OMe} + \text{Na}]^+$                   |
| 13    | 1189.9    | 6             | $[\alpha\text{CT11-3OMe} + \text{K}]^+$                    |
| 14    | 1196      | 15            | $[\alpha\text{CT11-3OMe} + 2\text{Na} - \text{H}]^+$       |
| 15    | 1197      | 11            | $[\alpha\text{CT11-3OMe} + 2\text{Na} - \text{H}]^+$       |
| 16    | 1198      | 6             | $[\alpha\text{CT11-3OMe} + 2\text{Na} - \text{H}]^+$       |

**Figure S59.** MALDI-TOF MS of  $\alpha$ CT11-3OMe(D5,D6,E8) after the trifluoroacetate counterion exchange. Multiple esterified  $\alpha$ CT11 species, but no activated  $\alpha$ CT11, were detected, suggesting a small amount of hydrolysis over the counterion exchange.

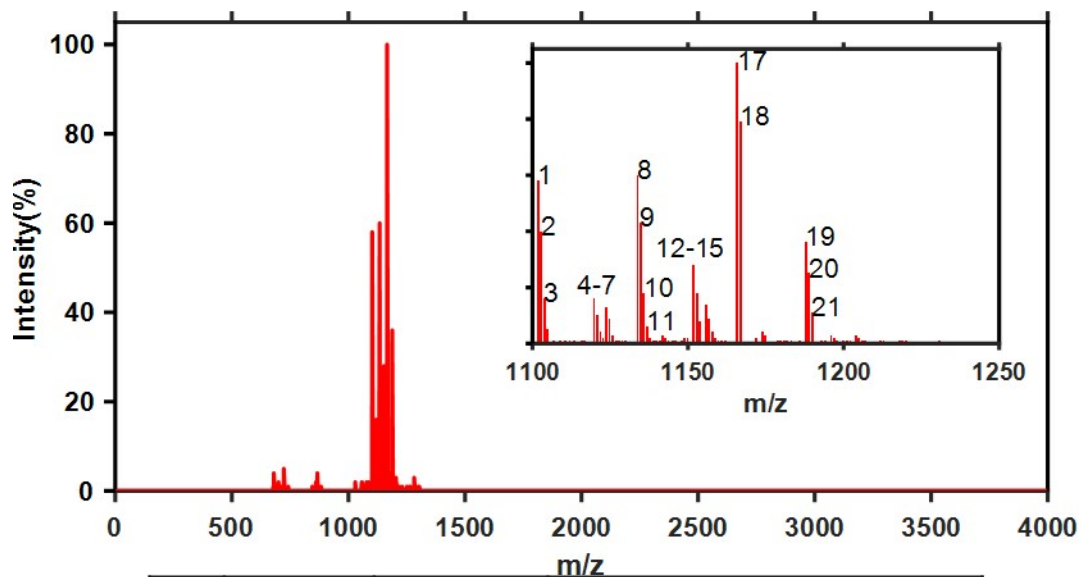

| label | Mass (Da) | Intensity (%) | Species                                           |
|-------|-----------|---------------|---------------------------------------------------|
| 1     | 1101.8    | 58            | [ $\alpha$ CT11-2OMe + 2 imide + H] <sup>+</sup>  |
| 2     | 1102.8    | 40            | [ $\alpha$ CT11-2OMe + 2 imide + H] <sup>+</sup>  |
| 3     | 1103.9    | 16            | [ $\alpha$ CT11-2OMe + 2 imide + H] <sup>+</sup>  |
| 4     | 1119.8    | 16            | [ $\alpha$ CT11-2OMe + 1 imide + H] <sup>+</sup>  |
| 5     | 1120.8    | 10            | [ $\alpha$ CT11-2OMe + 1 imide + H] <sup>+</sup>  |
| 6     | 1123.8    | 13            | [ $\alpha$ CT11-1OMe + H] <sup>+</sup>            |
| 7     | 1124.8    | 9             | [ $\alpha$ CT11-1OMe + H] <sup>+</sup>            |
| 8     | 1133.8    | 60            | [ $\alpha$ CT11-3OMe + 1 imide + H] <sup>+</sup>  |
| 9     | 1134.8    | 43            | [ $\alpha$ CT11-3OMe + 1 imide + H] <sup>+</sup>  |
| 10    | 1135.8    | 18            | [ $\alpha$ CT11-3OMe + 1 imide + H] <sup>+</sup>  |
| 11    | 1136.9    | 6             | [ $\alpha$ CT11-3OMe + 1 imide + H] <sup>+</sup>  |
| 12    | 1151.8    | 28            | [ $\alpha$ CT11-3OMe + H] <sup>+</sup>            |
| 13    | 1152.9    | 18            | [ $\alpha$ CT11-3OMe + H] <sup>+</sup>            |
| 14    | 1153.8    | 8             | [ $\alpha$ CT11-3OMe + H] <sup>+</sup>            |
| 15    | 1155.9    | 14            | [ $\alpha$ CT11-3OMe + 1 imide + Na] <sup>+</sup> |
| 16    | 1156.8    | 9             | [ $\alpha$ CT11-3OMe + 1 imide + Na] <sup>+</sup> |
| 17    | 1165.8    | 100           | [ $\alpha$ CT11-4OMe + H] <sup>+</sup>            |
| 18    | 1166.9    | 79            | [ $\alpha$ CT11-4OMe + H] <sup>+</sup>            |
| 19    | 1187.9    | 36            | [ $\alpha$ CT11-4OMe + Na] <sup>+</sup>           |
| 20    | 1188.9    | 25            | [ $\alpha$ CT11-4OMe + Na] <sup>+</sup>           |
| 21    | 1189.9    | 11            | [ $\alpha$ CT11-4OMe + Na] <sup>+</sup>           |

**Figure S60.** MALDI-TOF MS of  $\alpha$ CT11-4OMe after the trifluoroacetate counterion exchange. Multiple esterified  $\alpha$ CT11 species, but no activated  $\alpha$ CT11, were detected, suggesting a small amount of hydrolysis over the counterion exchange.

**Table S14.** Scratch wound assay results: relative migration indices (Rel. Mis) and standard deviation for each individual scratched cell culture and their averages.

| Cell Culture:  | Vehicle    |            | $\alpha$ CT11 |            | 3OMe(D5,D6,E8) |            | 4OMe       |            |
|----------------|------------|------------|---------------|------------|----------------|------------|------------|------------|
|                | Rel. MI    | StDev      | Rel. MI       | StDev      | Rel. MI        | StDev      | Rel. MI    | StDev      |
| 1              | 1.0        | 0.3        | 1.7           | 1.2        | 6.0            | 1.7        | 8.1        | 0.9        |
| 2              | 1.0        | 0.3        | 1.4           | 0.5        | 5.3            | 1.4        | 6.6        | 0.7        |
| 3              | 1.0        | 0.8        | 1.0           | 0.4        | 3.1            | 0.5        | 4.0        | 0.5        |
| <b>Average</b> | <b>1.0</b> | <b>0.0</b> | <b>1.4</b>    | <b>0.4</b> | <b>4.8</b>     | <b>1.5</b> | <b>6.2</b> | <b>2.1</b> |

**Table S15.** Statistical analysis of scratch wound assays: one-tailed paired t-tests assuming unequal variances (confidence interval = 0.95).

| Treatment      | Vehicle | $\alpha$ CT11 | 3OMe(D5,D6,E8) | 4OMe |
|----------------|---------|---------------|----------------|------|
| Vehicle        |         | 0.11          | 0.02           | 0.02 |
| $\alpha$ CT11  |         |               | 0.03           | 0.03 |
| 3OMe(D5,D6,E8) |         |               |                | 0.19 |
| 4OMe           |         |               |                |      |
